# Supplementary material for: Proteome expression profiling of red blood cells during the tumorigenesis of hepatocellular carcinoma
Source: PLoS One. 2022 Nov 8;17(11):e0276904. doi: 10.1371/journal.pone.0276904 (PMC9642896; doi:10.1371/journal.pone.0276904)
Supplement: S3 Table — SMIM1 and ANXA7 are the top two confirmed proteins. (XLSX) [file pone.0276904.s003.xlsx]

## Sheet: Tested proteins by PRM 
ID	Gene	LC-1	LC-2	LC-3	LC-4	LC-5	LC-6	LC-7	LC-8	LC-9	HCC-1	HCC-2	HCC-3	HCC-4	HCC-5	HCC-6	HCC-7	HCC-8	HCC-9	HCC-10	HCC-11	HC-1	HC-2	HC-3	HC-4	HC-5	HC-6	HC-7	HC-8	HC-9	HC-10	MEDIAN(LC)	MEDIAN(HCC)	MEDIAN(HCC)	AVERAGE(LC)	AVERAGE(HCC)	AVERAGE(HC)	PVALUE(LCvsHCC)	PVALUE(HCvsHCC)	PVALUE(LCvsHC)	HC	HCC	LC	HCC/HC	HCC/LC	LC/HC
sp|B2RUZ4|SMIM1_HUMAN	SMIM1	769835	1302927	1939014	1527489	1597976	1685214	1080602	589215	1463968	1726514	1992339	2872682	2037851	2188472	1865353	1406816	2672999	1866860	2411706	2459809	1320275	911714	2150453	1881722	2274821	2052382	700587	1890434	1548216	1750611	1463968	2037851	1.81617e+06	1.32847e+06	2136491	1.64812e+06	0.000328	0.0155562	0.144507	1648122	2136491	1398301	1.29632	1.52792	0.848421
sp|P20073|ANXA7_HUMAN	ANXA7	5934296	7354708	11338831	6688333	7996290	5289348	8880960	6435185	3971904	5324171	4713828	6912448	5857834	4774696	4249467	4930541	7865397	6420997	5709198	7723385	5331890	1011671	5061736	4912060	5015192	5527873	6084688	3816781	4458534	4275205	6688333	5709198	4963626	7.09887e+06	5.862e+06	4549563	0.061776	0.0170092	0.003327	4549563	5861997	7244445	1.28848	0.809171	1.59234
sp|P69891|HBG1_HUMAN	HBG1	595000000	1130000000	443000000	559000000	67536603	200000000	343000000	376000000	629000000	946000000	423000000	205000000	114000000	423000000	662000000	1160000000	744000000	1370000000	509000000	551000000	247000000	79425781	447000000	82271398	201000000	567000000	375000000	74486307	433000000	897000000	443000000	551000000	311000000	482504067	6.46091e+08	3.40318e+08	0.156607	0.0246628	0.183533	340000000	646000000	468000000	1.89809	1.38118	1.37425
sp|Q16543|CDC37_HUMAN	CDC37	2025525	1656017	4118399	1778610	2500917	1642146	4031273	2235643	1905100	1284206	855635	1802681	1741705	1224699	995066	1715491	1490611	1908757	1496820	1575529	1155936	287442	866397	1079385	1775008	1200526	1869521	1006266	744950	1181345	2025525	1496820	1.11766e+06	2.43263e+06	1.46284e+06	1.11668e+06	0.003051	0.0315746	0.00081	1116678	1462836	2483513	1.30999	0.589019	2.22402
sp|P26447|S10A4_HUMAN	S100A4	93720471	79456398	146000000	59561854	98170542	82609999	151000000	82417224	89163546	99331859	75792722	61779275	98795344	106000000	78370477	74488680	111000000	176000000	73210531	134000000	54944731	39707615	83182727	72581488	67010125	85907012	142000000	87551027	71769206	76128724	89163546	98795344	74355106	9.80111e+07	9.8979e+07	7.80783e+07	0.471375	0.0648742	0.081452	78046824	98973715	98453592	1.26813	1.00528	1.26147
sp|P02100|HBE_HUMAN	HBE1	38896786	21648324	33538926	52846487	40765313	31273102	52872318	32864256	26298388	30885070	35959083	37679969	27455921	26886266	26694116	31026373	33408303	57051311	27103641	32558892	33115680	8555338	23419942	25512671	29917897	27558257	47801075	23040417	26108698	27729387	33538926	31026373	2.68335e+07	3.67782e+07	3.33372e+07	2.72759e+07	0.219989	0.0741077	0.041626	27275936	33337177	36513389	1.22222	0.913012	1.33867
sp|Q6B0K9|HBM_HUMAN	HBM	1326068	6453191	7241668	4370667	1790120	1505370	6741599	2060379	2524448	1768341	1443020	3343431	906300	1266041	1026113	5642847	1817519	7683940	1518642	4104551	1725732	458255	1130837	925224	4081292	2667862	1261287	550199	1102082	2851960	2524448	1768341	1196062	3.77928e+06	2.77461e+06	1675473	0.173527	0.0878802	0.006681	1675473	2774613	4085930	1.65602	0.679065	2.43867
sp|P61981|1433G_HUMAN	1433G	2760677	1858330	2685274	2386313	4526934	2099900	4551762	2759795	1121277	1279571	946999	1323682	1617076	993583	531062	1434903	843425	1203027	1709848	1419041	1153493	518307	649028	1079054	1635846	1030393	1339071	893568	1353811	281390	2685274	1279571	1.05472e+06	2.75003e+06	1.20929e+06	993396	0.000235	0.10662	0.000288	993396	1209292	2748698	1.21733	0.439951	2.76697
sp|O14737|PDCD5_HUMAN	PDCD5	481900	167548	1343950	268295	268690	366479	723091	424389	323791	284573	459076	635111	305674	392279	410749	346287	462132	386502	223558	485111	315721	20196	121477	383254	458056	396764	555920	355243	172412	476338	366479	392279	369248	485348	399187	325538	0.229891	0.126237	0.126089	325538	399186	485779	1.22624	0.821745	1.49223
sp|P02042|HBD_HUMAN	HBD	7880000000	5870000000	6810000000	7400000000	7340000000	7610000000	11900000000	5440000000	6780000000	7390000000	7280000000	8200000000	6640000000	6720000000	6730000000	6150000000	8230000000	8700000000	7580000000	8540000000	6630000000	5030000000	7150000000	5740000000	8240000000	7560000000	9850000000	6910000000	5860000000	6010000000	7340000000	7390000000	6770000000	7.44778e+09	7.46909e+09	6898000000	0.484183	0.135673	0.272934	6900000000	7470000000	7390000000	1.0825	1.0107	1.07104
sp|Q9NPQ8|RIC8A_HUMAN	RIC8A	624030	578670	895664	549812	711076	583992	1012216	413163	87415	412411	211938	823145	187008	460926	142891	295710	234775	445317	193912	464790	236445	29193	221240	121583	745919	285840	353768	329639	92169	151570	583992	295710	228842	606226	352075	256737	0.012482	0.14386	0.003997	256737	352075	604001	1.37135	0.582904	2.35261
sp|P31946|1433B_HUMAN	1433B	9868204	8350423	14399879	7113195	12716451	7147180	15665258	11856688	6823377	5483484	5680681	7977443	8977098	5932141	5095072	6228363	11323236	9413669	6657930	6991712	3807561	1361780	6614068	6482635	9495115	7093338	10283849	7134505	5283178	4969306	9868204	6657930	6.54835e+06	1.04379e+07	7.25098e+06	6.25253e+06	0.008005	0.164834	0.004938	6252534	7250984	10509056	1.15969	0.689975	1.68077
sp|P36959|QDPR_HUMAN	QDPR	10328407	6301573	11376480	7434002	9789177	8107739	10371968	8082703	2098357	7588632	9376397	8662996	8957492	2438038	6252154	5759404	11070783	7594198	7913434	7983482	6510346	812258	6369497	5937288	8398157	8899048	8990916	8785435	5848697	5227752	8107739	7913434	6.43992e+06	8.21005e+06	7.59973e+06	6.57794e+06	0.297715	0.166979	0.147801	6577939	7599728	7945250	1.15534	0.956512	1.20786
sp|P68871|HBB_HUMAN	HBB	36600000000	30000000000	37600000000	31700000000	36000000000	32000000000	47600000000	30100000000	28300000000	28800000000	33100000000	37400000000	28300000000	19300000000	27600000000	28200000000	36500000000	39600000000	28000000000	39400000000	29000000000	16500000000	32300000000	26600000000	34700000000	28300000000	38900000000	27700000000	27700000000	28800000000	32000000000	28800000000	28550000000	3.44333e+10	3.14727e+10	29050000000	0.14985	0.185622	0.0468	29100000000	31500000000	34200000000	1.08387	0.921787	1.17583
sp|P69905|HBA_HUMAN	HBA1	5960000000	5830000000	9090000000	6270000000	7960000000	7140000000	12700000000	6000000000	5870000000	5500000000	6820000000	1710000000	6050000000	6910000000	4610000000	5460000000	2230000000	6980000000	1350000000	3490000000	4030000000	2690000000	6290000000	4990000000	7780000000	6070000000	8290000000	5000000000	5690000000	2930000000	6270000000	5460000000	5345000000	7.42444e+09	4.64636e+09	5376000000	0.005715	0.207541	0.019498	5380000000	4650000000	7610000000	0.864209	0.61085	1.41477
sp|P69892|HBG2_HUMAN	HBG2	53289865	166000000	49030380	48170152	10060373	18016523	187000000	653000000	88416471	112000000	35106549	134000000	11290113	29434979	81203963	1280000000	249000000	904000000	84074167	141000000	140000000	7757618	26964964	29458458	11832146	661000000	24743411	11952310	66093429	859000000	53289865	112000000	28211711	1.41443e+08	2.78283e+08	1.8388e+08	0.189735	0.282664	0.405155	184000000	278000000	152000000	1.51415	1.82622	0.829118
sp|P16070|CD44_HUMAN	CD44	191625	442960	970871	394324	1116913	62952	2105580	465204	535153	623467	511656	846314	393683	345445	327068	531272	474104	932088	361425	813137	484079	150055	480390	219273	898129	793879	733865	783284	364635	324470	465204	511656	482234	698398	559969	523206	0.249768	0.364734	0.147957	523206	559969	761745	1.07027	0.735114	1.45592
sp|P02724|GYPA_HUMAN	GYPA	455718	625258	812048	1373708	2515648	995056	2405265	444449	895705	1654790	768176	1459822	875585	757827	1292630	597591	1054727	926100	810044	972596	1791244	443989	632121	2274191	134235	734453	1617152	787558	404102	564933	895705	926100	683287	1.16921e+06	1.01544e+06	938398	0.280494	0.373399	0.188512	938398	1015444	1258392	1.0821	0.806938	1.341
sp|P02008|HBZ_HUMAN	HBZ	13843668	17624361	7206295	49212967	15316788	1262442	42255280	1804979	1534967	26800069	13762220	66184303	7510500	58364699	44837093	1527523	21167178	2583213	39401703	52631425	692509	11240202	1667646	30503283	45823971	27862967	123000000	34623917	28121145	29236522	13843668	26800069	2.86788e+07	1.66735e+07	3.04336e+07	3.32772e+07	0.080003	0.41401	0.126232	33236407	30433630	17027260	0.915671	1.78735	0.512307
