# Supplementary material for: Proteome expression profiling of red blood cells during the tumorigenesis of hepatocellular carcinoma
Source: PLoS One. 2022 Nov 8;17(11):e0276904. doi: 10.1371/journal.pone.0276904 (PMC9642896; doi:10.1371/journal.pone.0276904)
Supplement: S4 Table — (XLSX) [file pone.0276904.s004.xlsx]

## Sheet: PRM precurcors
GeneName	Mass [m/z]	Species	CS [z]	Polarity	Start [min]	End [min]	(N)CE	(N)CE type	MSX ID	Comment	Modification	UniprotID
1433G	415.876	Human	3	Positive	7.62	11.62	27	NCE		EHMQPTHPIR		P61981
1433G	567.774	Human	2	Positive	7.78	11.78	27	NCE		AYSEAHEISK		P61981
1433G	710.997	Human	3	Positive	31.65	35.65	27	NCE		TAFDDAIAELDTLNEDSYK		P61981
1433G	822.398	Human	2	Positive	15.32	19.32	27	NCE		NVTELNEPLSNEER		P61981
1433G	591.785	Human	2	Positive	9.85	13.85	27	NCE		YLSEVASGDNK		P31946
1433G	720.34	Human	3	Positive	32.35	36.35	27	NCE		TAFDEAIAELDTLNEESYK		P31946
1433G	799.873	Human	2	Positive	8.08	12.08	27	NCE		AVTEQGHELSNEER		P31946
1433G	1065.54	Human	2	Positive	35.16	39.16	27	NCE		IEAELQDICNDVLELLDK		P31946
1433G	1080.02	Human	2	Positive	19.28	23.28	27	NCE		QTTVSNSQQAYQEAFEISK		P31946
SMIM1	514.239	Human	3	Positive	9.27	13.27	27	NCE		MQPQESHVHYSR	(1×Acetyl [N-Term])	B2RUZ4
SMIM1	519.571	Human	3	Positive	5.81	9.81	27	NCE		MQPQESHVHYSR	(1×Oxidation [M1]; 1×Acetyl [N-Term])	B2RUZ4
S100A4	445.753	Human	2	Positive	22.14	26.14	27	NCE		ELPSFLGK		P26447
S100A4	525.256	Human	2	Positive	10.27	14.27	27	NCE		LMSNLDSNR		P26447
S100A4	624.326	Human	2	Positive	18.65	22.65	27	NCE		ALDVMVSTFHK		P26447
RIC8A	473.803	Human	2	Positive	29.22	33.22	27	NCE		ALLIFLEK		Q9NPQ8
QDPR	382.227	Human	2	Positive	11.74	15.74	27	NCE		VLVYGGR		P09417
QDPR	515.301	Human	2	Positive	21.35	25.35	27	NCE		EGGLLTLAGAK		P09417
QDPR	553.962	Human	3	Positive	20.14	24.14	27	NCE		QSIWTSTISSHLATK		P09417
QDPR	600.991	Human	3	Positive	18.3	22.3	27	NCE		NRPSSGSLIQVVTTEGR		P09417
QDPR	829.924	Human	2	Positive	25.45	29.45	27	NCE		VDAILCVAGGWAGGNAK		P09417
QDPR	978.949	Human	2	Positive	20.75	24.75	27	NCE		MTDSFTEQADQVTAEVGK		P09417
PDCD5	707.887	Human	2	Positive	26.61	30.61	27	NCE		NSILAQVLDQSAR		O14737
HBZ	357.537	Human	3	Positive	10.86	14.86	27	NCE		LFLSHPQTK		P02008
HBZ	405.568	Human	3	Positive	18.13	22.13	27	NCE		LSELHAYILR		P02008
HBZ	464.777	Human	2	Positive	11.55	15.55	27	NCE		VVAAVGDAVK		P02008
HBZ	472.239	Human	4	Positive	21.05	25.05	27	NCE		TYFPHFDLHPGSAQLR		P02008
HBZ	538.286	Human	2	Positive	17.3	21.3	27	NCE		SIDDIGGALSK		P02008
HBZ	559.595	Human	3	Positive	21.19	25.19	27	NCE		FPADFTAEAHAAWDK		P02008
HBZ	654.874	Human	2	Positive	27.48	31.48	27	NCE		FLSVVSSVLTEK		P02008
HBM	528.293	Human	2	Positive	19.1	23.1	27	NCE		LFTVYPSTK		Q6B0K9
HBG2	589.812	Human	2	Positive	16.3	20.3	27	NCE		MVTGVASALSSR	1×Oxidation [M1]	P69892
HBG1	596.823	Human	2	Positive	17.94	21.94	27	NCE		MVTAVASALSSR		P69891
HBG1	604.82	Human	2	Positive	15.24	19.24	27	NCE		MVTAVASALSSR		P69891
HBE1	501.239	Human	2	Positive	8.84	12.84	27	NCE		LSELHCDK	1×Carbamidomethyl [C6]	P02100
HBE1	549.784	Human	2	Positive	13.12	17.12	27	NCE		LHVDPENFK		P02100
HBE1	637.868	Human	2	Positive	28.81	32.81	27	NCE		LLVVYPWTQR		P02100
HBD	480.27	Human	2	Positive	17.78	21.78	27	NCE		TAVNALWGK		P02042
HBD	628.834	Human	2	Positive	15.73	19.73	27	NCE		VNVDAVGGEALGR		P02042
HBD	721.345	Human	2	Positive	15.05	19.05	27	NCE		EFTPQMQAAYQK		P02042
HBD	1022.97	Human	2	Positive	28.55	32.55	27	NCE		FFESFGDLSSPDAVMGNPK		P02042
HBB	438.893	Human	3	Positive	15.76	19.76	27	NCE		VNVDEVGGEALGR		P68871
HBB	466.764	Human	2	Positive	36.55	40.55	27	NCE		SAVTALWGK		P68871
HBB	573.996	Human	3	Positive	32.14	36.14	27	NCE		LLGNVLVCVLAHHFGK		P68871
HBB	689.855	Human	2	Positive	17.08	21.08	27	NCE		EFTPPVQAAYQK		P68871
HBB	711.341	Human	2	Positive	17.97	21.97	27	NCE		GTFATLSELHCDK		P68871
HBB	1029.98	Human	2	Positive	29.06	33.06	27	NCE		FFESFGDLSTPDAVMGNPK	1×Oxidation [M15]	P68871
HBB	1114.59	Human	2	Positive	25.71	29.71	27	NCE		SAVTALWGKVNVDEVGGEALGR		P68871
HBA1	536.282	Human	2	Positive	28.81	32.81	27	NCE		MFLSFPTTK		P69905
HBA1	765.371	Human	2	Positive	14.87	18.87	27	NCE		VGAHAGEYGAEALER		P69905
HBA1	917.449	Human	2	Positive	19.87	23.87	27	NCE		TYFPHFDLSHGSAQVK		P69905
GYPA	376.199	Human	3	Positive	9.13	13.13	27	NCE		AHEVSEISVR		P02724
GYPA	703.825	Human	2	Positive	10.53	14.53	27	NCE		TVYPPEEETGER		P02724
GYPA	1060.51	Human	3	Positive	25.63	29.63	27	NCE		SPSDVKPLPSPDTDVPLSSVEIENPETSDQ		P02724
GYPA	1103.21	Human	3	Positive	22.87	26.87	27	NCE		KSPSDVKPLPSPDTDVPLSSVEIENPETSDQ		P02724
GMPR	416.214	Human	2	Positive	10.07	14.07	27	NCE		AEVDLER		P36959
GMPR	529.252	Human	2	Positive	8.52	12.52	27	NCE		STCTYVGAAK		P36959
GMPR	532.246	Human	2	Positive	14.39	18.39	27	NCE		HYSLDDWK		P36959
GMPR	581.931	Human	3	Positive	9.53	13.53	27	NCE		GHIISDGGCTCPGDVAK	2×Carbamidomethyl [C9; C11]	P36959
GMPR	758.382	Human	3	Positive	25.78	29.78	27	NCE		TGVGYPQLSAVIECADSAHGLK	1×Carbamidomethyl [C14]	P36959
GMPR	792.936	Human	2	Positive	35.45	39.45	27	NCE		GDVENTILDILGGLR		P36959
GMPR	939.117	Human	3	Positive	17.65	21.65	27	NCE		LFATNHPECLQNVAVSSGSGQNDLEK	1×Carbamidomethyl [C9]	P36959
GMPR	1038.54	Human	3	Positive	35.2	39.2	27	NCE		FPEHTIMAGNVVTGEMVEELILSGADIIK		P36959
CDC37	466.24	Human	2	Positive	9.67	13.67	27	NCE		ELEVAEGGK		Q16543
CDC37	528.793	Human	2	Positive	9.48	13.48	27	NCE		LQAEAQQLR		Q16543
CD44	462.923	Human	3	Positive	20.74	24.74	27	NCE		YGFIEGHVVIPR		P16070
CD44	481.242	Human	2	Positive	10.29	14.29	27	NCE		NLQNVDMK		P16070
ANXA7	464.713	Human	2	Positive	8.53	12.53	27	NCE		ATMEAYSR		P20073
ANXA7	523.72	Human	2	Positive	9.95	13.95	27	NCE		CYQSEFGR		P20073
ANXA7	546.27	Human	2	Positive	9.78	13.78	27	NCE		GAGTDDSTLVR		P20073
ANXA7	608.299	Human	2	Positive	17.28	21.28	27	NCE		EFSGYVESGLK		P20073
ANXA7	671.96	Human	3	Positive	8.66	12.66	27	NCE		DENQSINHQMAQEDAQR		P20073
ANXA7	845.926	Human	2	Positive	25.75	29.75	27	NCE		GFGTDEQAIVDVVANR		P20073
ANXA7	864.412	Human	2	Positive	26.43	30.43	27	NCE		LGTDESCFNMILATR	1×Carbamidomethyl [C7]	P20073
