# Supplementary material for: Proteome expression profiling of red blood cells during the tumorigenesis of hepatocellular carcinoma
Source: PLoS One. 2022 Nov 8;17(11):e0276904. doi: 10.1371/journal.pone.0276904 (PMC9642896; doi:10.1371/journal.pone.0276904)
Supplement: S6 Table — (XLSX) [file pone.0276904.s006.xlsx]

## Sheet: HCC VS LC
ID	FoldChange	Log2FoldChange	Uniprot	Genename	Biological Process	Cell Component	Molecular Function	KEGG Pathways	Disease	Drug	UNIPROT_URL	Transcription Factor
SMIM1	18.983	4.24664	B2RUZ4	SMIM1		GO:0043230,extracellular organelle|GO:0031982,vesicle|GO:0044421,extracellular region part|GO:0043227,membrane-bounded organelle|GO:0016021,integral component of membrane|GO:0016020,membrane|GO:0031988,membrane-bounded vesicle|GO:0005576,extracellular region|GO:0044425,membrane part|GO:1903561,extracellular vesicle|GO:0065010,extracellular membrane-bounded organelle|GO:0043226,organelle|GO:003122…	GO:0005488,binding|GO:0005515,protein binding|GO:0046983,protein dimerization activity|GO:0042802,identical protein binding|GO:0042803,protein homodimerization activity				http://www.uniprot.org/uniprot/B2RUZ4	False
PPP2R1B	18.0303	4.17235	P30154	PPP2R1B	GO:2001235,positive regulation of apoptotic signaling pathway|GO:2001236,regulation of extrinsic apoptotic signaling pathway|GO:0019220,regulation of phosphate metabolic process|GO:0080090,regulation of primary metabolic process|GO:0019222,regulation of metabolic process|GO:2001233,regulation of apoptotic signaling pathway|GO:0006470,protein dephosphorylation|GO:0048584,positive regulation of res…	GO:0016020,membrane|GO:0098589,membrane region|GO:0043230,extracellular organelle|GO:0031982,vesicle|GO:0044421,extracellular region part|GO:0043227,membrane-bounded organelle|GO:0098805,whole membrane|GO:0045121,membrane raft|GO:0031988,membrane-bounded vesicle|GO:0005576,extracellular region|GO:0044425,membrane part|GO:1903561,extracellular vesicle|GO:0065010,extracellular membrane-bounded orga…	GO:0019888,protein phosphatase regulator activity|GO:0019208,phosphatase regulator activity|GO:0005488,binding|GO:0005515,protein binding|GO:0008601,protein phosphatase type 2A regulator activity|GO:0098772,molecular function regulator|GO:0030234,enzyme regulator activity|GO:0016787,hydrolase activity|GO:0016791,phosphatase activity|GO:0140096,catalytic activity, acting on a protein|GO:0004722,pr…	hsa04350,TGF-beta signaling pathway|hsa04530,Tight junction|hsa05160,Hepatitis C|hsa05142,Chagas disease (American trypanosomiasis)|hsa04114,Oocyte meiosis|hsa04071,Sphingolipid signaling pathway|hsa03015,mRNA surveillance pathway|hsa04390,Hippo signaling pathway|hsa05165,Human papillomavirus infection|hsa04728,Dopaminergic synapse|hsa04152,AMPK signaling pathway|hsa04261,Adrenergic signaling in …			http://www.uniprot.org/uniprot/P30154	False
PPIL1	8.38403	3.06764	Q9Y3C6	PPIL1	GO:0044238,primary metabolic process|GO:0006457,protein folding|GO:0090304,nucleic acid metabolic process|GO:0034641,cellular nitrogen compound metabolic process|GO:0006807,nitrogen compound metabolic process|GO:0000398,mRNA splicing, via spliceosome|GO:1901360,organic cyclic compound metabolic process|GO:0006139,nucleobase-containing compound metabolic process|GO:0000413,protein peptidyl-prolyl …	GO:0043229,intracellular organelle|GO:0030529,intracellular ribonucleoprotein complex|GO:0043227,membrane-bounded organelle|GO:0043226,organelle|GO:0031982,vesicle|GO:0005634,nucleus|GO:0031988,membrane-bounded vesicle|GO:0071013,catalytic step 2 spliceosome|GO:0032991,macromolecular complex|GO:1903561,extracellular vesicle|GO:0070062,extracellular exosome|GO:0043230,extracellular organelle|GO:00…	GO:0003755,peptidyl-prolyl cis-trans isomerase activity|GO:0016853,isomerase activity|GO:0016859,cis-trans isomerase activity|GO:0003824,catalytic activity|GO:0005488,binding|GO:0005515,protein binding|GO:0033218,amide binding|GO:0016018,cyclosporin A binding|GO:0042277,peptide binding|GO:0008144,drug binding|GO:0140096,catalytic activity, acting on a protein|GO:0019904,protein domain specific bi…	hsa03040,Spliceosome			http://www.uniprot.org/uniprot/Q9Y3C6	False
MAP2K3	5.84238	2.54656	P46734	MAP2K3	GO:0019220,regulation of phosphate metabolic process|GO:0080090,regulation of primary metabolic process|GO:0019222,regulation of metabolic process|GO:0048584,positive regulation of response to stimulus|GO:0048583,regulation of response to stimulus|GO:0032147,activation of protein kinase activity|GO:0031349,positive regulation of defense response|GO:0003012,muscle system process|GO:0003013,circula…	GO:0031974,membrane-enclosed lumen|GO:0043229,intracellular organelle|GO:0043227,membrane-bounded organelle|GO:0043226,organelle|GO:0005737,cytoplasm|GO:0031981,nuclear lumen|GO:0005634,nucleus|GO:0016020,membrane|GO:0005654,nucleoplasm|GO:0043231,intracellular membrane-bounded organelle|GO:0043233,organelle lumen|GO:0005829,cytosol|GO:0044464,cell part|GO:0005623,cell|GO:0005622,intracellular|GO…	GO:0035639,purine ribonucleoside triphosphate binding|GO:0019899,enzyme binding|GO:0004672,protein kinase activity|GO:0043167,ion binding|GO:1901363,heterocyclic compound binding|GO:0001883,purine nucleoside binding|GO:0001882,nucleoside binding|GO:0043168,anion binding|GO:0019900,kinase binding|GO:0000166,nucleotide binding|GO:0004674,protein serine/threonine kinase activity|GO:0016740,transfera…	hsa04935,unkown|hsa05135,unkown|hsa05235,unkown|hsa05145,Toxoplasmosis|hsa04620,Toll-like receptor signaling pathway|hsa05014,Amyotrophic lateral sclerosis (ALS)|hsa04912,GnRH signaling pathway|hsa04218,Cellular senescence|hsa04015,Rap1 signaling pathway|hsa04664,Fc epsilon RI signaling pathway|hsa05169,Epstein-Barr virus infection|hsa04010,MAPK signaling pathway|hsa04668,TNF signaling pathway|hs…			http://www.uniprot.org/uniprot/P46734	False
RAB5C	5.43251	2.44162	P51148	RAB5C	GO:0008104,protein localization|GO:0051234,establishment of localization|GO:0050794,regulation of cellular process|GO:0051049,regulation of transport|GO:0051128,regulation of cellular component organization|GO:0048227,plasma membrane to endosome transport|GO:0023052,signaling|GO:0007165,signal transduction|GO:0051641,cellular localization|GO:0035556,intracellular signal transduction|GO:0050789,re…	GO:0016020,membrane|GO:0000323,lytic vacuole|GO:0044421,extracellular region part|GO:0048770,pigment granule|GO:0030139,endocytic vesicle|GO:0043229,intracellular organelle|GO:0043228,non-membrane-bounded organelle|GO:0005773,vacuole|GO:0031988,membrane-bounded vesicle|GO:0043227,membrane-bounded organelle|GO:0043226,organelle|GO:0010008,endosome membrane|GO:0005737,cytoplasm|GO:0005764,lysosome|…	GO:0035639,purine ribonucleoside triphosphate binding|GO:0005488,binding|GO:0043167,ion binding|GO:1901363,heterocyclic compound binding|GO:1901265,nucleoside phosphate binding|GO:0001882,nucleoside binding|GO:0043168,anion binding|GO:0016462,pyrophosphatase activity|GO:0000166,nucleotide binding|GO:0032561,guanyl ribonucleotide binding|GO:0001883,purine nucleoside binding|GO:0032549,ribonucleosi…	hsa04962,Vasopressin-regulated water reabsorption|hsa04014,Ras signaling pathway|hsa04145,Phagosome|hsa04144,Endocytosis|hsa05152,Tuberculosis|hsa05146,Amoebiasis			http://www.uniprot.org/uniprot/P51148	False
KRAS	5.05486	2.33767	P01116	KRAS	GO:0007599,hemostasis|GO:0007596,blood coagulation|GO:0051716,cellular response to stimulus|GO:0000165,MAPK cascade|GO:0060541,respiratory system development|GO:0035176,social behavior|GO:0048468,cell development|GO:0045859,regulation of protein kinase activity|GO:0097485,neuron projection guidance|GO:0046483,heterocycle metabolic process|GO:0042325,regulation of phosphorylation|GO:0042327,positi…	GO:0019897,extrinsic component of plasma membrane|GO:0009898,cytoplasmic side of plasma membrane|GO:0019898,extrinsic component of membrane|GO:0043229,intracellular organelle|GO:0071944,cell periphery|GO:0098552,side of membrane|GO:0005924,cell-substrate adherens junction|GO:0005925,focal adhesion|GO:0043227,membrane-bounded organelle|GO:0043226,organelle|GO:0030054,cell junction|GO:0030055,cell-…	GO:0035639,purine ribonucleoside triphosphate binding|GO:0044877,macromolecular complex binding|GO:0005488,binding|GO:0000166,nucleotide binding|GO:1901363,heterocyclic compound binding|GO:1901265,nucleoside phosphate binding|GO:0001882,nucleoside binding|GO:0043168,anion binding|GO:0043167,ion binding|GO:0032561,guanyl ribonucleotide binding|GO:0001883,purine nucleoside binding|GO:0032549,ribonu…	hsa04550,Signaling pathways regulating pluripotency of stem cells|hsa05219,Bladder cancer|hsa04929,unkown|hsa05212,Pancreatic cancer|hsa04650,Natural killer cell mediated cytotoxicity|hsa05210,Colorectal cancer|hsa04915,Estrogen signaling pathway|hsa05216,Thyroid cancer|hsa05218,Melanoma|hsa05214,Glioma|hsa05215,Prostate cancer|hsa04140,Regulation of autophagy|hsa04722,Neurotrophin signaling path…	H00019,Pancreatic cancer|H00020,Colorectal cancer		http://www.uniprot.org/uniprot/P01116	False
MOB1B	4.52106	2.17666	Q7L9L4	MOB1B	GO:0019220,regulation of phosphate metabolic process|GO:0009893,positive regulation of metabolic process|GO:0019222,regulation of metabolic process|GO:0016310,phosphorylation|GO:0031325,positive regulation of cellular metabolic process|GO:0031323,regulation of cellular metabolic process|GO:0023052,signaling|GO:0007165,signal transduction|GO:0035556,intracellular signal transduction|GO:0050789,reg…	GO:0043231,intracellular membrane-bounded organelle|GO:0005737,cytoplasm|GO:0005829,cytosol|GO:0005622,intracellular|GO:0043230,extracellular organelle|GO:0031982,vesicle|GO:0044421,extracellular region part|GO:0043227,membrane-bounded organelle|GO:0005634,nucleus|GO:0044464,cell part|GO:0044444,cytoplasmic part|GO:0005623,cell|GO:0031988,membrane-bounded vesicle|GO:0043229,intracellular organell…	GO:0043169,cation binding|GO:0046872,metal ion binding|GO:0019207,kinase regulator activity|GO:0030234,enzyme regulator activity|GO:0019209,kinase activator activity|GO:0019899,enzyme binding|GO:0043167,ion binding|GO:0019900,kinase binding|GO:0008047,enzyme activator activity|GO:0005515,protein binding|GO:0098772,molecular function regulator|GO:0005488,binding	hsa04390,Hippo signaling pathway|hsa04392,Hippo signaling pathway -multiple species			http://www.uniprot.org/uniprot/Q7L9L4	False
TBCB	3.7273	1.89813	K7EP07	TBCB		GO:0005737,cytoplasm|GO:0044446,intracellular organelle part|GO:0043231,intracellular membrane-bounded organelle|GO:0031981,nuclear lumen|GO:0043233,organelle lumen|GO:0005634,nucleus|GO:0044464,cell part|GO:0031974,membrane-enclosed lumen|GO:0005622,intracellular|GO:0005654,nucleoplasm|GO:0070013,intracellular organelle lumen|GO:0043229,intracellular organelle|GO:0044428,nuclear part|GO:0005623,…					http://www.uniprot.org/uniprot/K7EP07	False
LAP3	3.63129	1.86048	P28838	LAP3	GO:0044238,primary metabolic process|GO:0019538,protein metabolic process|GO:0043170,macromolecule metabolic process|GO:0071704,organic substance metabolic process|GO:0008152,metabolic process|GO:0006508,proteolysis|GO:1901564,organonitrogen compound metabolic process|GO:0006807,nitrogen compound metabolic process	GO:0031974,membrane-enclosed lumen|GO:0043229,intracellular organelle|GO:0005924,cell-substrate adherens junction|GO:0005925,focal adhesion|GO:0043227,membrane-bounded organelle|GO:0043226,organelle|GO:0030054,cell junction|GO:0030055,cell-substrate junction|GO:0005737,cytoplasm|GO:0031984,organelle subcompartment|GO:0070062,extracellular exosome|GO:0031981,nuclear lumen|GO:0005634,nucleus|GO:000…	GO:0004177,aminopeptidase activity|GO:0046914,transition metal ion binding|GO:0016787,hydrolase activity|GO:0003824,catalytic activity|GO:0043169,cation binding|GO:0030145,manganese ion binding|GO:0043167,ion binding|GO:0008238,exopeptidase activity|GO:0070011,peptidase activity, acting on L-amino acid peptides|GO:0005488,binding|GO:0008233,peptidase activity|GO:0046872,metal ion binding|GO:00082…	hsa01100,Metabolic pathways|hsa00480,Glutathione metabolism|hsa00330,Arginine and proline metabolism			http://www.uniprot.org/uniprot/P28838	False
MAP2K2	3.62722	1.85886	P36507	MAP2K2	GO:0044238,primary metabolic process|GO:0019220,regulation of phosphate metabolic process|GO:0080090,regulation of primary metabolic process|GO:0019222,regulation of metabolic process|GO:0051049,regulation of transport|GO:0032386,regulation of intracellular transport|GO:0048584,positive regulation of response to stimulus|GO:0048679,regulation of axon regeneration|GO:0032147,activation of protein …	GO:0016020,membrane|GO:0005783,endoplasmic reticulum|GO:0009898,cytoplasmic side of plasma membrane|GO:0042579,microbody|GO:0043229,intracellular organelle|GO:0043228,non-membrane-bounded organelle|GO:0098552,side of membrane|GO:0005924,cell-substrate adherens junction|GO:0005925,focal adhesion|GO:0005874,microtubule|GO:0043226,organelle|GO:0030054,cell junction|GO:0030055,cell-substrate junction…	GO:0005488,binding|GO:0019207,kinase regulator activity|GO:0035639,purine ribonucleoside triphosphate binding|GO:0019209,kinase activator activity|GO:0032947,protein complex scaffold activity|GO:0098772,molecular function regulator|GO:1901363,heterocyclic compound binding|GO:0001883,purine nucleoside binding|GO:0001882,nucleoside binding|GO:0043168,anion binding|GO:0043167,ion binding|GO:0032549,…	hsa04550,Signaling pathways regulating pluripotency of stem cells|hsa05219,Bladder cancer|hsa04929,unkown|hsa05135,unkown|hsa04022,cGMP-PKG signaling pathway|hsa04650,Natural killer cell mediated cytotoxicity|hsa05210,Colorectal cancer|hsa04915,Estrogen signaling pathway|hsa05216,Thyroid cancer|hsa05218,Melanoma|hsa04024,cAMP signaling pathway|hsa05215,Prostate cancer|hsa04140,Regulation of autop…		D09666,Selumetinib (USAN/INN)|D10024,Selumetinib sulfate (JAN/USAN)|D10175,Trametinib (USAN)|D10176,Trametinib dimethyl sulfoxide (JAN/USAN); Mekinist (TN)|D10426,Pimasertib (USAN/INN)|D10486,Pimasertib hydrochloride (USAN)|D10604,Binimetinib (JAN/USAN)	http://www.uniprot.org/uniprot/P36507	False
MAP2K1	3.3184	1.73049	Q02750	MAP2K1	GO:0051049,regulation of transport|GO:0098779,mitophagy in response to mitochondrial depolarization|GO:0051656,establishment of organelle localization|GO:0051650,establishment of vesicle localization|GO:0051716,cellular response to stimulus|GO:0000165,MAPK cascade|GO:0030855,epithelial cell differentiation|GO:0060541,respiratory system development|GO:0031103,axon regeneration|GO:0031102,neuron pr…	GO:0042995,cell projection|GO:0016020,membrane|GO:0005783,endoplasmic reticulum|GO:0044421,extracellular region part|GO:0030425,dendrite|GO:0030424,axon|GO:0043229,intracellular organelle|GO:0043228,non-membrane-bounded organelle|GO:0005924,cell-substrate adherens junction|GO:0005815,microtubule organizing center|GO:0005874,microtubule|GO:0043226,organelle|GO:0030054,cell junction|GO:0030055,cell…	GO:0005488,binding|GO:0008022,protein C-terminus binding|GO:0016791,phosphatase activity|GO:0019207,kinase regulator activity|GO:0035639,purine ribonucleoside triphosphate binding|GO:0019209,kinase activator activity|GO:0019899,enzyme binding|GO:0042578,phosphoric ester hydrolase activity|GO:0060089,molecular transducer activity|GO:0051020,GTPase binding|GO:0019900,kinase binding|GO:0008047,enzym…	hsa04550,Signaling pathways regulating pluripotency of stem cells|hsa05219,Bladder cancer|hsa04510,Focal adhesion|hsa05135,unkown|hsa04022,cGMP-PKG signaling pathway|hsa04650,Natural killer cell mediated cytotoxicity|hsa05210,Colorectal cancer|hsa04726,Serotonergic synapse|hsa05216,Thyroid cancer|hsa05218,Melanoma|hsa04024,cAMP signaling pathway|hsa05215,Prostate cancer|hsa04140,Regulation of aut…		D09666,Selumetinib (USAN/INN)|D10024,Selumetinib sulfate (JAN/USAN)|D10175,Trametinib (USAN)|D10176,Trametinib dimethyl sulfoxide (JAN/USAN); Mekinist (TN)|D10426,Pimasertib (USAN/INN)|D10486,Pimasertib hydrochloride (USAN)|D10604,Binimetinib (JAN/USAN)	http://www.uniprot.org/uniprot/Q02750	False
YKT6	2.60859	1.38327	O15498	YKT6	GO:0008104,protein localization|GO:0008152,metabolic process|GO:0051648,vesicle localization|GO:0006904,vesicle docking involved in exocytosis|GO:0006906,vesicle fusion|GO:0006903,vesicle targeting|GO:0061025,membrane fusion|GO:0061024,membrane organization|GO:0032940,secretion by cell|GO:0051641,cellular localization|GO:0051640,organelle localization|GO:0051656,establishment of organelle localiz…	GO:0005783,endoplasmic reticulum|GO:0043229,intracellular organelle|GO:0071944,cell periphery|GO:0031201,SNARE complex|GO:0005622,intracellular|GO:0043227,membrane-bounded organelle|GO:0043226,organelle|GO:0031224,intrinsic component of membrane|GO:0005737,cytoplasm|GO:0070062,extracellular exosome|GO:0016023,cytoplasmic, membrane-bounded vesicle|GO:0031410,cytoplasmic vesicle|GO:0016021,integral…	GO:0003824,catalytic activity|GO:0000149,SNARE binding|GO:0016417,S-acyltransferase activity|GO:0016740,transferase activity|GO:0016746,transferase activity, transferring acyl groups|GO:0016747,transferase activity, transferring acyl groups other than amino-acyl groups|GO:0005515,protein binding|GO:0005484,SNAP receptor activity|GO:0019707,protein-cysteine S-acyltransferase activity|GO:0019706,pr…	hsa04130,SNARE interactions in vesicular transport			http://www.uniprot.org/uniprot/O15498	False
ANXA7	2.46775	1.30319	P20073	ANXA7	GO:0022604,regulation of cell morphogenesis|GO:0009992,cellular water homeostasis|GO:0009628,response to abiotic stimulus|GO:0009892,negative regulation of metabolic process|GO:0008152,metabolic process|GO:0019222,regulation of metabolic process|GO:0022603,regulation of anatomical structure morphogenesis|GO:0050801,ion homeostasis|GO:0030154,cell differentiation|GO:0007610,behavior|GO:0051128,reg…	GO:0016020,membrane|GO:0005783,endoplasmic reticulum|GO:0044421,extracellular region part|GO:0005789,endoplasmic reticulum membrane|GO:0042175,nuclear outer membrane-endoplasmic reticulum membrane network|GO:0043229,intracellular organelle|GO:0071944,cell periphery|GO:0043227,membrane-bounded organelle|GO:0043226,organelle|GO:0005737,cytoplasm|GO:0030667,secretory granule membrane|GO:0070062,extr…	GO:0048306,calcium-dependent protein binding|GO:0005488,binding|GO:0003676,nucleic acid binding|GO:1901363,heterocyclic compound binding|GO:0043168,anion binding|GO:0043169,cation binding|GO:0005543,phospholipid binding|GO:0005544,calcium-dependent phospholipid binding|GO:0043167,ion binding|GO:0005509,calcium ion binding|GO:0032403,protein complex binding|GO:0046872,metal ion binding|GO:0005178,…				http://www.uniprot.org/uniprot/P20073	False
GABARAPL2	2.45488	1.29565	P60520	GABARAPL2	GO:0008104,protein localization|GO:0080090,regulation of primary metabolic process|GO:0019222,regulation of metabolic process|GO:0061025,membrane fusion|GO:0061024,membrane organization|GO:0007005,mitochondrion organization|GO:0044712,single-organism catabolic process|GO:0051716,cellular response to stimulus|GO:0010605,negative regulation of macromolecule metabolic process|GO:1901799,negative reg…	GO:0019898,extrinsic component of membrane|GO:0043229,intracellular organelle|GO:0005622,intracellular|GO:0043227,membrane-bounded organelle|GO:0043226,organelle|GO:0005737,cytoplasm|GO:0000407,pre-autophagosomal structure|GO:0031090,organelle membrane|GO:0005773,vacuole|GO:0031410,cytoplasmic vesicle|GO:0098805,whole membrane|GO:0016020,membrane|GO:0005776,autophagosome|GO:0005774,vacuolar membr…	GO:0015631,tubulin binding|GO:0008092,cytoskeletal protein binding|GO:0051117,ATPase binding|GO:0008017,microtubule binding|GO:0019899,enzyme binding|GO:0048487,beta-tubulin binding|GO:0044877,macromolecular complex binding|GO:0050811,GABA receptor binding|GO:0005515,protein binding|GO:0032403,protein complex binding|GO:0005102,receptor binding|GO:0000149,SNARE binding|GO:0005488,binding|GO:00316…	hsa04727,GABAergic synapse|hsa04371,Apelin signaling pathway|hsa04621,NOD-like receptor signaling pathway|hsa04140,Regulation of autophagy|hsa04136,unkown|hsa04137,unkown|hsa04068,FoxO signaling pathway|hsa05167,Kaposi sarcoma-associated herpesvirus infection			http://www.uniprot.org/uniprot/P60520	False
CUL5	2.37725	1.24929	Q93034	CUL5	GO:0009628,response to abiotic stimulus|GO:0000082,G1/S transition of mitotic cell cycle|GO:0044257,cellular protein catabolic process|GO:0060322,head development|GO:0007165,signal transduction|GO:0098771,inorganic ion homeostasis|GO:0051716,cellular response to stimulus|GO:0045786,negative regulation of cell cycle|GO:0070647,protein modification by small protein conjugation or removal|GO:0044419…	GO:0043229,intracellular organelle|GO:0071944,cell periphery|GO:0043227,membrane-bounded organelle|GO:0043226,organelle|GO:0005737,cytoplasm|GO:0005634,nucleus|GO:0016020,membrane|GO:1902494,catalytic complex|GO:1990234,transferase complex|GO:0005886,plasma membrane|GO:0031461,cullin-RING ubiquitin ligase complex|GO:0031466,Cul5-RING ubiquitin ligase complex|GO:0043234,protein complex|GO:0032991,…	GO:0005261,cation channel activity|GO:0005262,calcium channel activity|GO:0019899,enzyme binding|GO:0060089,molecular transducer activity|GO:0004872,receptor activity|GO:0044389,ubiquitin-like protein ligase binding|GO:0019787,ubiquitin-like protein transferase activity|GO:0015085,calcium ion transmembrane transporter activity|GO:0061630,ubiquitin protein ligase activity|GO:0072509,divalent inorg…	hsa05170,Human immunodeficiency virus 1 infection|hsa04120,Ubiquitin mediated proteolysis			http://www.uniprot.org/uniprot/Q93034	False
SVIP	2.27815	1.18787	Q8NHG7	SVIP	GO:0033157,regulation of intracellular protein transport|GO:1903061,positive regulation of protein lipidation|GO:0008104,protein localization|GO:0080090,regulation of primary metabolic process|GO:0032434,regulation of proteasomal ubiquitin-dependent protein catabolic process|GO:0032435,negative regulation of proteasomal ubiquitin-dependent protein catabolic process|GO:0051049,regulation of transp…	GO:0005783,endoplasmic reticulum|GO:0005789,endoplasmic reticulum membrane|GO:0042175,nuclear outer membrane-endoplasmic reticulum membrane network|GO:0043229,intracellular organelle|GO:0071944,cell periphery|GO:0005623,cell|GO:0000153,cytoplasmic ubiquitin ligase complex|GO:0043227,membrane-bounded organelle|GO:0043226,organelle|GO:0031224,intrinsic component of membrane|GO:0031225,anchored comp…	GO:0051117,ATPase binding|GO:0019899,enzyme binding|GO:0005488,binding|GO:0005515,protein binding|GO:0043621,protein self-association	hsa04141,Protein processing in endoplasmic reticulum			http://www.uniprot.org/uniprot/Q8NHG7	False
HBG2	2.23484	1.16017	P69892	HBG2	GO:0051234,establishment of localization|GO:0044699,single-organism process|GO:0032501,multicellular organismal process|GO:0007599,hemostasis|GO:0044707,single-multicellular organism process|GO:0050878,regulation of body fluid levels|GO:0006950,response to stress|GO:0050896,response to stimulus|GO:0007596,blood coagulation|GO:0009611,response to wounding|GO:0042060,wound healing|GO:0015669,gas tr…	GO:0043234,protein complex|GO:0005737,cytoplasm|GO:0032991,macromolecular complex|GO:0005615,extracellular space|GO:0005829,cytosol|GO:0044464,cell part|GO:0005623,cell|GO:0005833,hemoglobin complex|GO:0044444,cytoplasmic part|GO:0044445,cytosolic part|GO:0072562,blood microparticle|GO:0044424,intracellular part|GO:0005622,intracellular|GO:0044421,extracellular region part|GO:0005576,extracellula…	GO:0043169,cation binding|GO:0005344,oxygen transporter activity|GO:0022892,substrate-specific transporter activity|GO:0046914,transition metal ion binding|GO:0020037,heme binding|GO:0046906,tetrapyrrole binding|GO:0005215,transporter activity|GO:0043167,ion binding|GO:0019825,oxygen binding|GO:0005488,binding|GO:0097159,organic cyclic compound binding|GO:0005506,iron ion binding|GO:0046872,metal…				http://www.uniprot.org/uniprot/P69892	False
GPX4	2.07942	1.05618	P36969	GPX4	GO:0006631,fatty acid metabolic process|GO:0043933,macromolecular complex subunit organization|GO:0019953,sexual reproduction|GO:0019752,carboxylic acid metabolic process|GO:0001676,long-chain fatty acid metabolic process|GO:0044281,small molecule metabolic process|GO:0007275,multicellular organism development|GO:0007276,gamete generation|GO:0048609,multicellular organismal reproductive process|G…	GO:0016020,membrane|GO:0044464,cell part|GO:0031975,envelope|GO:0043229,intracellular organelle|GO:0043227,membrane-bounded organelle|GO:0043226,organelle|GO:0005737,cytoplasm|GO:0031090,organelle membrane|GO:0005634,nucleus|GO:0005635,nuclear envelope|GO:0044444,cytoplasmic part|GO:0005739,mitochondrion|GO:0031988,membrane-bounded vesicle|GO:0031967,organelle envelope|GO:0031966,mitochondrial me…	GO:0047066,phospholipid-hydroperoxide glutathione peroxidase activity|GO:0016209,antioxidant activity|GO:0003824,catalytic activity|GO:0016684,oxidoreductase activity, acting on peroxide as acceptor|GO:0004601,peroxidase activity|GO:0004602,glutathione peroxidase activity|GO:0016491,oxidoreductase activity|GO:0005488,binding|GO:0042802,identical protein binding|GO:0005515,protein binding|GO:00084…	hsa01100,Metabolic pathways|hsa00480,Glutathione metabolism|hsa04216,Ferroptosis			http://www.uniprot.org/uniprot/P36969	False
QDPR	1.94588	0.960425	P09417	QDPR	GO:0043436,oxoacid metabolic process|GO:0044281,small molecule metabolic process|GO:0044282,small molecule catabolic process|GO:1901362,organic cyclic compound biosynthetic process|GO:1901360,organic cyclic compound metabolic process|GO:1901361,organic cyclic compound catabolic process|GO:0044712,single-organism catabolic process|GO:0044710,single-organism metabolic process|GO:0048513,animal orga…	GO:0043229,intracellular organelle|GO:0043227,membrane-bounded organelle|GO:0043226,organelle|GO:0005737,cytoplasm|GO:1903561,extracellular vesicle|GO:0031982,vesicle|GO:0005739,mitochondrion|GO:0031988,membrane-bounded vesicle|GO:0097458,neuron part|GO:0043005,neuron projection|GO:0042995,cell projection|GO:0070062,extracellular exosome|GO:0043230,extracellular organelle|GO:0043231,intracellular…	GO:0051287,NAD binding|GO:0005488,binding|GO:0043167,ion binding|GO:1901363,heterocyclic compound binding|GO:1901265,nucleoside phosphate binding|GO:0016491,oxidoreductase activity|GO:0043168,anion binding|GO:0050662,coenzyme binding|GO:0050661,NADP binding|GO:0016646,oxidoreductase activity, acting on the CH-NH group of donors, NAD or NADP as acceptor|GO:0016645,oxidoreductase activity, acting o…	hsa01100,Metabolic pathways|hsa00790,Folate biosynthesis			http://www.uniprot.org/uniprot/P09417	False
CTPS2	1.78762	0.838038	Q9NRF8	CTPS2	GO:0009148,pyrimidine nucleoside triphosphate biosynthetic process|GO:0008152,metabolic process|GO:0009218,pyrimidine ribonucleotide metabolic process|GO:0009141,nucleoside triphosphate metabolic process|GO:0009142,nucleoside triphosphate biosynthetic process|GO:0019752,carboxylic acid metabolic process|GO:0009147,pyrimidine nucleoside triphosphate metabolic process|GO:0072528,pyrimidine-containi…	GO:0005737,cytoplasm|GO:0043231,intracellular membrane-bounded organelle|GO:0005829,cytosol|GO:0044464,cell part|GO:0044444,cytoplasmic part|GO:0005739,mitochondrion|GO:0005622,intracellular|GO:0043229,intracellular organelle|GO:0005623,cell|GO:0044424,intracellular part|GO:0043227,membrane-bounded organelle|GO:0043226,organelle|GO:0097268,cytoophidium	GO:0035639,purine ribonucleoside triphosphate binding|GO:0005488,binding|GO:0043167,ion binding|GO:1901363,heterocyclic compound binding|GO:1901265,nucleoside phosphate binding|GO:0001882,nucleoside binding|GO:0043168,anion binding|GO:0000166,nucleotide binding|GO:0016879,ligase activity, forming carbon-nitrogen bonds|GO:0003883,CTP synthase activity|GO:0001883,purine nucleoside binding|GO:003254…	hsa01100,Metabolic pathways|hsa00240,Pyrimidine metabolism			http://www.uniprot.org/uniprot/Q9NRF8	False
AHSP	1.73433	0.794375	Q9NZD4	AHSP	GO:0031647,regulation of protein stability|GO:0006457,protein folding|GO:0020027,hemoglobin metabolic process|GO:0050821,protein stabilization|GO:0007275,multicellular organism development|GO:0044699,single-organism process|GO:0044267,cellular protein metabolic process|GO:0044260,cellular macromolecule metabolic process|GO:0071704,organic substance metabolic process|GO:0048513,animal organ develo…	GO:0043234,protein complex|GO:0005737,cytoplasm|GO:0032991,macromolecular complex|GO:0005829,cytosol|GO:0044464,cell part|GO:0005623,cell|GO:0005833,hemoglobin complex|GO:0044444,cytoplasmic part|GO:0044445,cytosolic part|GO:0044424,intracellular part|GO:0005622,intracellular	GO:0030492,hemoglobin binding|GO:0005515,protein binding|GO:0051082,unfolded protein binding|GO:0005488,binding				http://www.uniprot.org/uniprot/Q9NZD4	False
SUMO3	1.59529	0.673822	P55854	SUMO3	GO:0009896,positive regulation of catabolic process|GO:0034504,protein localization to nucleus|GO:0009894,regulation of catabolic process|GO:0008104,protein localization|GO:0019538,protein metabolic process|GO:0009893,positive regulation of metabolic process|GO:0031329,regulation of cellular catabolic process|GO:0070647,protein modification by small protein conjugation or removal|GO:0031325,posit…	GO:0031974,membrane-enclosed lumen|GO:0043229,intracellular organelle|GO:0043228,non-membrane-bounded organelle|GO:0043227,membrane-bounded organelle|GO:0043226,organelle|GO:0005737,cytoplasm|GO:0016605,PML body|GO:0016604,nuclear body|GO:0070062,extracellular exosome|GO:0031981,nuclear lumen|GO:0005634,nucleus|GO:0031988,membrane-bounded vesicle|GO:0005654,nucleoplasm|GO:0044451,nucleoplasm part…	GO:0019787,ubiquitin-like protein transferase activity|GO:0019789,SUMO transferase activity|GO:0003824,catalytic activity|GO:0016740,transferase activity|GO:0005488,binding|GO:0005515,protein binding|GO:0031386,protein tag|GO:0019899,enzyme binding	hsa05418,Fluid shear stress and atherosclerosis|hsa03013,RNA transport			http://www.uniprot.org/uniprot/P55854	False
FAM114A2	1.54997	0.632244	Q9NRY5	FAM114A2			GO:0097159,organic cyclic compound binding|GO:0000166,nucleotide binding|GO:0036094,small molecule binding|GO:0005488,binding|GO:0017076,purine nucleotide binding|GO:1901363,heterocyclic compound binding|GO:1901265,nucleoside phosphate binding				http://www.uniprot.org/uniprot/Q9NRY5	False
PSMB6	1.54401	0.626684	P28072	PSMB6	GO:0080090,regulation of primary metabolic process|GO:0019222,regulation of metabolic process|GO:0048585,negative regulation of response to stimulus|GO:0048584,positive regulation of response to stimulus|GO:0048583,regulation of response to stimulus|GO:0031349,positive regulation of defense response|GO:0030111,regulation of Wnt signaling pathway|GO:0007165,signal transduction|GO:0007166,cell surf…	GO:0031974,membrane-enclosed lumen|GO:0043229,intracellular organelle|GO:0043227,membrane-bounded organelle|GO:0043226,organelle|GO:0005737,cytoplasm|GO:0005839,proteasome core complex|GO:0031981,nuclear lumen|GO:0005634,nucleus|GO:0031988,membrane-bounded vesicle|GO:0005654,nucleoplasm|GO:0032991,macromolecular complex|GO:0005794,Golgi apparatus|GO:0031982,vesicle|GO:0012505,endomembrane system|…	GO:0016787,hydrolase activity|GO:0004175,endopeptidase activity|GO:0004298,threonine-type endopeptidase activity|GO:0003824,catalytic activity|GO:0070003,threonine-type peptidase activity|GO:0070011,peptidase activity, acting on L-amino acid peptides|GO:0008233,peptidase activity|GO:0045296,cadherin binding|GO:0005488,binding|GO:0005515,protein binding|GO:0050839,cell adhesion molecule binding|GO…	hsa03050,Proteasome			http://www.uniprot.org/uniprot/P28072	False
GMPR	1.52764	0.611309	P36959	GMPR	GO:0009628,response to abiotic stimulus|GO:0044249,cellular biosynthetic process|GO:0034641,cellular nitrogen compound metabolic process|GO:0006807,nitrogen compound metabolic process|GO:0044281,small molecule metabolic process|GO:0072521,purine-containing compound metabolic process|GO:0072522,purine-containing compound biosynthetic process|GO:1901362,organic cyclic compound biosynthetic process|…	GO:0043234,protein complex|GO:0005737,cytoplasm|GO:0032991,macromolecular complex|GO:1902494,catalytic complex|GO:0005829,cytosol|GO:0044464,cell part|GO:0005623,cell|GO:1990204,oxidoreductase complex|GO:0044444,cytoplasmic part|GO:1902560,GMP reductase complex|GO:0044424,intracellular part|GO:0005622,intracellular	GO:0005488,binding|GO:0043169,cation binding|GO:0003920,GMP reductase activity|GO:0043167,ion binding|GO:0003824,catalytic activity|GO:0016657,oxidoreductase activity, acting on NAD(P)H, nitrogenous group as acceptor|GO:0016651,oxidoreductase activity, acting on NAD(P)H|GO:0046872,metal ion binding|GO:0016491,oxidoreductase activity	hsa01100,Metabolic pathways|hsa00230,Purine metabolism			http://www.uniprot.org/uniprot/P36959	False
PITPNB	1.50732	0.59199	B3KYB6	PITPNB	GO:0006810,transport|GO:0051179,localization|GO:0051234,establishment of localization|GO:0006869,lipid transport|GO:0015914,phospholipid transport|GO:0071702,organic substance transport|GO:0015711,organic anion transport|GO:0006820,anion transport|GO:0015748,organophosphate ester transport|GO:0033036,macromolecule localization|GO:0010876,lipid localization|GO:0006811,ion transport	GO:0044464,cell part|GO:0005623,cell|GO:0005622,intracellular	GO:0005548,phospholipid transporter activity|GO:0005319,lipid transporter activity|GO:0022892,substrate-specific transporter activity|GO:0005215,transporter activity				http://www.uniprot.org/uniprot/B3KYB6	False
AP2A1	0.65651	-0.60711	O95782	AP2A1	GO:0008104,protein localization|GO:0080090,regulation of primary metabolic process|GO:0019222,regulation of metabolic process|GO:0048585,negative regulation of response to stimulus|GO:0048583,regulation of response to stimulus|GO:0007165,signal transduction|GO:0007166,cell surface receptor signaling pathway|GO:0007167,enzyme linked receptor protein signaling pathway|GO:0007169,transmembrane recep…	GO:0098590,plasma membrane region|GO:0032433,filopodium tip|GO:0030139,endocytic vesicle|GO:0043229,intracellular organelle|GO:0071944,cell periphery|GO:0030117,membrane coat|GO:0005905,clathrin-coated pit|GO:0012510,trans-Golgi network transport vesicle membrane|GO:0030131,clathrin adaptor complex|GO:0030130,clathrin coat of trans-Golgi network vesicle|GO:0030133,transport vesicle|GO:0030132,cla…	GO:0008565,protein transporter activity|GO:0030674,protein binding, bridging|GO:0022892,substrate-specific transporter activity|GO:0030276,clathrin binding|GO:0005215,transporter activity|GO:0008022,protein C-terminus binding|GO:0019899,enzyme binding|GO:0019901,protein kinase binding|GO:0019900,kinase binding|GO:0044877,macromolecular complex binding|GO:0005488,binding|GO:0005515,protein binding…	hsa04721,Synaptic vesicle cycle|hsa05016,Huntington's disease|hsa04961,Endocrine and other factor-regulated calcium reabsorption|hsa04144,Endocytosis			http://www.uniprot.org/uniprot/O95782	False
LSM3	0.648438	-0.62496	P62310	LSM3	GO:0090304,nucleic acid metabolic process|GO:0034641,cellular nitrogen compound metabolic process|GO:0006807,nitrogen compound metabolic process|GO:0044237,cellular metabolic process|GO:1901360,organic cyclic compound metabolic process|GO:1901361,organic cyclic compound catabolic process|GO:0006139,nucleobase-containing compound metabolic process|GO:1901575,organic substance catabolic process|GO:…	GO:0005737,cytoplasm|GO:0005829,cytosol|GO:0005622,intracellular|GO:0032991,macromolecular complex|GO:0043231,intracellular membrane-bounded organelle|GO:0071013,catalytic step 2 spliceosome|GO:0044464,cell part|GO:0044444,cytoplasmic part|GO:0005623,cell|GO:0043226,organelle|GO:0044446,intracellular organelle part|GO:0043229,intracellular organelle|GO:0044428,nuclear part|GO:0044422,organelle pa…	GO:0003676,nucleic acid binding|GO:0097159,organic cyclic compound binding|GO:0044822,poly(A) RNA binding|GO:0003723,RNA binding|GO:0005515,protein binding|GO:1901363,heterocyclic compound binding|GO:0005488,binding	hsa03040,Spliceosome|hsa03018,RNA degradation			http://www.uniprot.org/uniprot/P62310	False
TTLL12	0.642817	-0.637521	Q14166	TTLL12	GO:0044267,cellular protein metabolic process|GO:0044260,cellular macromolecule metabolic process|GO:0044238,primary metabolic process|GO:0019538,protein metabolic process|GO:0009987,cellular process|GO:0044237,cellular metabolic process|GO:0043170,macromolecule metabolic process|GO:0071704,organic substance metabolic process|GO:0043412,macromolecule modification|GO:0036211,protein modification p…	GO:0005737,cytoplasm|GO:0044464,cell part|GO:0005623,cell|GO:0005622,intracellular|GO:0044424,intracellular part|GO:0005856,cytoskeleton|GO:0005819,spindle|GO:0043228,non-membrane-bounded organelle|GO:0043231,intracellular membrane-bounded organelle|GO:0043232,intracellular non-membrane-bounded organelle|GO:0005634,nucleus|GO:0030496,midbody|GO:0005815,microtubule organizing center|GO:0044446,int…	GO:0043168,anion binding|GO:0030554,adenyl nucleotide binding|GO:0035639,purine ribonucleoside triphosphate binding|GO:0097367,carbohydrate derivative binding|GO:1901265,nucleoside phosphate binding|GO:0000166,nucleotide binding|GO:0036094,small molecule binding|GO:0003824,catalytic activity|GO:0032559,adenyl ribonucleotide binding|GO:0032553,ribonucleotide binding|GO:0097159,organic cyclic compo…				http://www.uniprot.org/uniprot/Q14166	False
CYB5A	0.642292	-0.638698	P00167	CYB5A	GO:0010038,response to metal ion|GO:1902600,hydrogen ion transmembrane transport|GO:0019752,carboxylic acid metabolic process|GO:0044723,single-organism carbohydrate metabolic process|GO:0006818,hydrogen transport|GO:0044281,small molecule metabolic process|GO:0044699,single-organism process|GO:0019852,L-ascorbic acid metabolic process|GO:0044710,single-organism metabolic process|GO:0010035,respo…	GO:0005783,endoplasmic reticulum|GO:0044421,extracellular region part|GO:0005789,endoplasmic reticulum membrane|GO:0042175,nuclear outer membrane-endoplasmic reticulum membrane network|GO:0043229,intracellular organelle|GO:0043227,membrane-bounded organelle|GO:0043226,organelle|GO:0031224,intrinsic component of membrane|GO:0005737,cytoplasm|GO:0031982,vesicle|GO:0031975,envelope|GO:0016021,integr…	GO:0004033,aldo-keto reductase (NADP) activity|GO:0019899,enzyme binding|GO:0005488,binding|GO:1901363,heterocyclic compound binding|GO:0016491,oxidoreductase activity|GO:0043169,cation binding|GO:0015077,monovalent inorganic cation transmembrane transporter activity|GO:0043167,ion binding|GO:0046872,metal ion binding|GO:0015002,heme-copper terminal oxidase activity|GO:0004129,cytochrome-c oxidas…				http://www.uniprot.org/uniprot/P00167	False
FKBP1A	0.633017	-0.659684	P62942	FKBP1A	GO:0044238,primary metabolic process|GO:0032924,activin receptor signaling pathway|GO:0032925,regulation of activin receptor signaling pathway|GO:0019222,regulation of metabolic process|GO:0051049,regulation of transport|GO:0032386,regulation of intracellular transport|GO:0048584,positive regulation of response to stimulus|GO:0051282,regulation of sequestering of calcium ion|GO:0051283,negative r…	GO:0005783,endoplasmic reticulum|GO:0005789,endoplasmic reticulum membrane|GO:0030016,myofibril|GO:0030017,sarcomere|GO:0043229,intracellular organelle|GO:0043228,non-membrane-bounded organelle|GO:0005623,cell|GO:0043227,membrane-bounded organelle|GO:0043226,organelle|GO:0030018,Z disc|GO:0005737,cytoplasm|GO:0031984,organelle subcompartment|GO:0070062,extracellular exosome|GO:0016020,membrane|GO…	GO:0005126,cytokine receptor binding|GO:0005160,transforming growth factor beta receptor binding|GO:0008144,drug binding|GO:0060089,molecular transducer activity|GO:0044877,macromolecular complex binding|GO:0005488,binding|GO:0004871,signal transducer activity|GO:0044325,ion channel binding|GO:0098772,molecular function regulator|GO:1901363,heterocyclic compound binding|GO:0019855,calcium channel…				http://www.uniprot.org/uniprot/P62942	False
AIDA	0.611996	-0.708406	Q96BJ3	AIDA	GO:0043549,regulation of kinase activity|GO:0019220,regulation of phosphate metabolic process|GO:0080090,regulation of primary metabolic process|GO:0019222,regulation of metabolic process|GO:0048585,negative regulation of response to stimulus|GO:0048583,regulation of response to stimulus|GO:0007165,signal transduction|GO:0023014,signal transduction by protein phosphorylation|GO:0044710,single-org…	GO:0005737,cytoplasm|GO:0044464,cell part|GO:0005623,cell|GO:0005622,intracellular|GO:0044424,intracellular part|GO:0016020,membrane	GO:0019904,protein domain specific binding|GO:0005515,protein binding|GO:0005488,binding|GO:0043168,anion binding|GO:0035091,phosphatidylinositol binding|GO:0005543,phospholipid binding|GO:0008289,lipid binding|GO:0043167,ion binding				http://www.uniprot.org/uniprot/Q96BJ3	False
S100A6	0.607912	-0.718066	P06703	S100A6	GO:0042127,regulation of cell proliferation|GO:0044707,single-multicellular organism process|GO:0030030,cell projection organization|GO:0048146,positive regulation of fibroblast proliferation|GO:0048145,regulation of fibroblast proliferation|GO:0048144,fibroblast proliferation|GO:0048468,cell development|GO:0032501,multicellular organismal process|GO:0023052,signaling|GO:0007165,signal transducti…	GO:0019897,extrinsic component of plasma membrane|GO:0016020,membrane|GO:0009898,cytoplasmic side of plasma membrane|GO:0019898,extrinsic component of membrane|GO:0043229,intracellular organelle|GO:0071944,cell periphery|GO:0098552,side of membrane|GO:0043227,membrane-bounded organelle|GO:0043226,organelle|GO:0005737,cytoplasm|GO:0001726,ruffle|GO:0042995,cell projection|GO:0031982,vesicle|GO:003…	GO:0022891,substrate-specific transmembrane transporter activity|GO:0043169,cation binding|GO:0022892,substrate-specific transporter activity|GO:0005515,protein binding|GO:0046914,transition metal ion binding|GO:0044548,S100 protein binding|GO:0005215,transporter activity|GO:0008092,cytoskeletal protein binding|GO:0005488,binding|GO:0043167,ion binding|GO:0015075,ion transmembrane transporter act…				http://www.uniprot.org/uniprot/P06703	False
GPHN	0.606006	-0.722596	Q9NQX3	GPHN	GO:0006777,Mo-molybdopterin cofactor biosynthetic process|GO:0050808,synapse organization|GO:0006732,coenzyme metabolic process|GO:0006807,nitrogen compound metabolic process|GO:0061024,membrane organization|GO:0022607,cellular component assembly|GO:0009108,coenzyme biosynthetic process|GO:0044281,small molecule metabolic process|GO:0051641,cellular localization|GO:1901576,organic substance biosy…	GO:0098590,plasma membrane region|GO:0043229,intracellular organelle|GO:0043228,non-membrane-bounded organelle|GO:0045202,synapse|GO:0005622,intracellular|GO:0043226,organelle|GO:0030054,cell junction|GO:0097060,synaptic membrane|GO:0098805,whole membrane|GO:0016020,membrane|GO:0098794,postsynapse|GO:0044456,synapse part|GO:0044459,plasma membrane part|GO:0005856,cytoskeleton|GO:0098589,membrane …	GO:0035639,purine ribonucleoside triphosphate binding|GO:0005488,binding|GO:0043167,ion binding|GO:1901363,heterocyclic compound binding|GO:1901265,nucleoside phosphate binding|GO:0001882,nucleoside binding|GO:0061599,molybdopterin molybdotransferase activity|GO:0061598,molybdopterin adenylyltransferase activity|GO:0000166,nucleotide binding|GO:0016740,transferase activity|GO:0001883,purine nucle…	hsa01100,Metabolic pathways|hsa00790,Folate biosynthesis|hsa04727,GABAergic synapse			http://www.uniprot.org/uniprot/Q9NQX3	False
FLOT1	0.6043	-0.726662	O75955	FLOT1	GO:0034116,positive regulation of heterotypic cell-cell adhesion|GO:0034114,regulation of heterotypic cell-cell adhesion|GO:0019220,regulation of phosphate metabolic process|GO:0080090,regulation of primary metabolic process|GO:0019222,regulation of metabolic process|GO:1901890,positive regulation of cell junction assembly|GO:0022407,regulation of cell-cell adhesion|GO:0010831,positive regulation…	GO:0048770,pigment granule|GO:0044853,plasma membrane raft|GO:0030054,cell junction|GO:0008180,COP9 signalosome|GO:0031982,vesicle|GO:0005773,vacuole|GO:0016021,integral component of membrane|GO:0016020,membrane|GO:0031988,membrane-bounded vesicle|GO:0044291,cell-cell contact zone|GO:0098589,membrane region|GO:0042995,cell projection|GO:0043234,protein complex|GO:0043230,extracellular organelle|G…	GO:0005515,protein binding|GO:0019899,enzyme binding|GO:0005488,binding|GO:0002020,protease binding|GO:0046983,protein dimerization activity|GO:0046982,protein heterodimerization activity|GO:0035255,ionotropic glutamate receptor binding|GO:0035254,glutamate receptor binding|GO:0005102,receptor binding	hsa04910,Insulin signaling pathway			http://www.uniprot.org/uniprot/O75955	False
UROS	0.571511	-0.807148	P10746	UROS	GO:0050896,response to stimulus|GO:0019752,carboxylic acid metabolic process|GO:0071243,cellular response to arsenic-containing substance|GO:0044249,cellular biosynthetic process|GO:0034641,cellular nitrogen compound metabolic process|GO:0006807,nitrogen compound metabolic process|GO:0046677,response to antibiotic|GO:0044281,small molecule metabolic process|GO:0070887,cellular response to chemica…	GO:0005737,cytoplasm|GO:0043231,intracellular membrane-bounded organelle|GO:0005829,cytosol|GO:0044464,cell part|GO:0044444,cytoplasmic part|GO:0005739,mitochondrion|GO:0005622,intracellular|GO:0043229,intracellular organelle|GO:0005623,cell|GO:0044424,intracellular part|GO:0043227,membrane-bounded organelle|GO:0043226,organelle	GO:0016835,carbon-oxygen lyase activity|GO:0016836,hydro-lyase activity|GO:0003824,catalytic activity|GO:0048037,cofactor binding|GO:0005488,binding|GO:0016829,lyase activity|GO:0004852,uroporphyrinogen-III synthase activity	hsa00860,Porphyrin and chlorophyll metabolism|hsa01100,Metabolic pathways			http://www.uniprot.org/uniprot/P10746	False
MVD	0.570415	-0.809916	P53602	MVD	GO:0042127,regulation of cell proliferation|GO:0006637,acyl-CoA metabolic process|GO:0006732,coenzyme metabolic process|GO:0051186,cofactor metabolic process|GO:0035383,thioester metabolic process|GO:0044249,cellular biosynthetic process|GO:0046490,isopentenyl diphosphate metabolic process|GO:0044281,small molecule metabolic process|GO:0034645,cellular macromolecule biosynthetic process|GO:004428…	GO:0005737,cytoplasm|GO:0043231,intracellular membrane-bounded organelle|GO:0044464,cell part|GO:0005829,cytosol|GO:0005777,peroxisome|GO:0044444,cytoplasmic part|GO:0005623,cell|GO:0005622,intracellular|GO:0042579,microbody|GO:0043229,intracellular organelle|GO:0044424,intracellular part|GO:0043227,membrane-bounded organelle|GO:0043226,organelle	GO:0035639,purine ribonucleoside triphosphate binding|GO:0031072,heat shock protein binding|GO:0005488,binding|GO:0043167,ion binding|GO:1901363,heterocyclic compound binding|GO:1901265,nucleoside phosphate binding|GO:0001882,nucleoside binding|GO:0043168,anion binding|GO:0030544,Hsp70 protein binding|GO:0016829,lyase activity|GO:0000166,nucleotide binding|GO:0001883,purine nucleoside binding|GO:…	hsa00900,Terpenoid backbone biosynthesis|hsa01100,Metabolic pathways			http://www.uniprot.org/uniprot/P53602	False
MYL6B	0.561523	-0.832584	P14649	MYL6B	GO:0006928,movement of cell or subcellular component|GO:0003012,muscle system process|GO:0061061,muscle structure development|GO:0007275,multicellular organism development|GO:0044699,single-organism process|GO:0007517,muscle organ development|GO:0030029,actin filament-based process|GO:0007519,skeletal muscle tissue development|GO:0033275,actin-myosin filament sliding|GO:0048513,animal organ devel…	GO:0015629,actin cytoskeleton|GO:0043229,intracellular organelle|GO:0043228,non-membrane-bounded organelle|GO:0044430,cytoskeletal part|GO:0031988,membrane-bounded vesicle|GO:0043227,membrane-bounded organelle|GO:0043226,organelle|GO:0005856,cytoskeleton|GO:0031982,vesicle|GO:0044444,cytoplasmic part|GO:0005859,muscle myosin complex|GO:0016459,myosin complex|GO:0005576,extracellular region|GO:000…	GO:0016787,hydrolase activity|GO:0016818,hydrolase activity, acting on acid anhydrides, in phosphorus-containing anhydrides|GO:0003824,catalytic activity|GO:0043167,ion binding|GO:0017111,nucleoside-triphosphatase activity|GO:0016817,hydrolase activity, acting on acid anhydrides|GO:0005198,structural molecule activity|GO:0016462,pyrophosphatase activity|GO:0008307,structural constituent of muscle…	hsa04530,Tight junction|hsa04921,Oxytocin signaling pathway|hsa04270,Vascular smooth muscle contraction			http://www.uniprot.org/uniprot/P14649	False
KRT14	0.544555	-0.87685	P02533	KRT14	GO:0022607,cellular component assembly|GO:0043933,macromolecular complex subunit organization|GO:0009314,response to radiation|GO:1990267,response to transition metal nanoparticle|GO:0030154,cell differentiation|GO:0007044,cell-substrate junction assembly|GO:0042221,response to chemical|GO:0010043,response to zinc ion|GO:0008544,epidermis development|GO:0044699,single-organism process|GO:0045110,…	GO:0045095,keratin filament|GO:0043229,intracellular organelle|GO:0043228,non-membrane-bounded organelle|GO:0043227,membrane-bounded organelle|GO:0043226,organelle|GO:0005856,cytoskeleton|GO:0045111,intermediate filament cytoskeleton|GO:0031982,vesicle|GO:0005634,nucleus|GO:0031988,membrane-bounded vesicle|GO:0044430,cytoskeletal part|GO:0005576,extracellular region|GO:0005737,cytoplasm|GO:000588…	GO:0005200,structural constituent of cytoskeleton|GO:0019215,intermediate filament binding|GO:0005198,structural molecule activity|GO:0044877,macromolecular complex binding|GO:0005488,binding|GO:0005515,protein binding|GO:0032403,protein complex binding|GO:1990254,keratin filament binding	hsa05150,Staphylococcus aureus infection|hsa04915,Estrogen signaling pathway			http://www.uniprot.org/uniprot/P02533	False
ALDOC	0.526375	-0.925837	P09972	ALDOC	GO:0009167,purine ribonucleoside monophosphate metabolic process|GO:0061621,canonical glycolysis|GO:0061620,glycolytic process through glucose-6-phosphate|GO:0044281,small molecule metabolic process|GO:0009161,ribonucleoside monophosphate metabolic process|GO:1901360,organic cyclic compound metabolic process|GO:0044712,single-organism catabolic process|GO:0044710,single-organism metabolic process…	GO:0043229,intracellular organelle|GO:0043228,non-membrane-bounded organelle|GO:0043227,membrane-bounded organelle|GO:0043226,organelle|GO:0005856,cytoskeleton|GO:0031982,vesicle|GO:0005739,mitochondrion|GO:0031988,membrane-bounded vesicle|GO:0005737,cytoplasm|GO:1903561,extracellular vesicle|GO:0070062,extracellular exosome|GO:0043230,extracellular organelle|GO:0043231,intracellular membrane-bou…	GO:0005515,protein binding|GO:0008092,cytoskeletal protein binding|GO:0016829,lyase activity|GO:0016830,carbon-carbon lyase activity|GO:0016832,aldehyde-lyase activity|GO:0003824,catalytic activity|GO:0005488,binding|GO:0004332,fructose-bisphosphate aldolase activity	hsa01200,Carbon metabolism|hsa01100,Metabolic pathways|hsa00030,Pentose phosphate pathway|hsa04066,HIF-1 signaling pathway|hsa00051,Fructose and mannose metabolism|hsa01230,Biosynthesis of amino acids|hsa00010,Glycolysis / Gluconeogenesis			http://www.uniprot.org/uniprot/P09972	False
AKR1E2	0.503759	-0.989194	Q96JD6	AKR1E2	GO:0009896,positive regulation of catabolic process|GO:0032106,positive regulation of response to extracellular stimulus|GO:0009894,regulation of catabolic process|GO:0016239,positive regulation of macroautophagy|GO:0009893,positive regulation of metabolic process|GO:0031329,regulation of cellular catabolic process|GO:0032101,regulation of response to external stimulus|GO:0031325,positive regulat…	GO:0005737,cytoplasm|GO:0005622,intracellular|GO:0043230,extracellular organelle|GO:0031982,vesicle|GO:0044421,extracellular region part|GO:0043227,membrane-bounded organelle|GO:0044464,cell part|GO:0005623,cell|GO:0031988,membrane-bounded vesicle|GO:0005576,extracellular region|GO:0044424,intracellular part|GO:1903561,extracellular vesicle|GO:0065010,extracellular membrane-bounded organelle|GO:0…	GO:0016614,oxidoreductase activity, acting on CH-OH group of donors|GO:0016616,oxidoreductase activity, acting on the CH-OH group of donors, NAD or NADP as acceptor|GO:0003824,catalytic activity|GO:0050571,1,5-anhydro-D-fructose reductase activity|GO:0016491,oxidoreductase activity|GO:0004033,aldo-keto reductase (NADP) activity|GO:0004032,alditol:NADP+ 1-oxidoreductase activity|GO:0008106,alcohol…				http://www.uniprot.org/uniprot/Q96JD6	False
YARS	0.485813	-1.04153	P54577	YARS	GO:0006437,tyrosyl-tRNA aminoacylation|GO:0044238,primary metabolic process|GO:0019752,carboxylic acid metabolic process|GO:1901564,organonitrogen compound metabolic process|GO:0090304,nucleic acid metabolic process|GO:0044249,cellular biosynthetic process|GO:0034641,cellular nitrogen compound metabolic process|GO:0006807,nitrogen compound metabolic process|GO:0023052,signaling|GO:0007165,signal …	GO:0005737,cytoplasm|GO:0043231,intracellular membrane-bounded organelle|GO:0044421,extracellular region part|GO:0005829,cytosol|GO:0044464,cell part|GO:0044444,cytoplasmic part|GO:0005623,cell|GO:0043226,organelle|GO:0043229,intracellular organelle|GO:0005576,extracellular region|GO:0044424,intracellular part|GO:0005622,intracellular|GO:0043227,membrane-bounded organelle|GO:0005634,nucleus|GO:00…	GO:0005126,cytokine receptor binding|GO:0004871,signal transducer activity|GO:0035639,purine ribonucleoside triphosphate binding|GO:0060089,molecular transducer activity|GO:0005488,binding|GO:0003676,nucleic acid binding|GO:0001664,G-protein coupled receptor binding|GO:0004831,tyrosine-tRNA ligase activity|GO:0043167,ion binding|GO:1901363,heterocyclic compound binding|GO:0001883,purine nucleosid…	hsa00970,Aminoacyl-tRNA biosynthesis			http://www.uniprot.org/uniprot/P54577	False
CROCC2	0.466939	-1.09869	H7BZ55	CROCC2							http://www.uniprot.org/uniprot/H7BZ55	False
RDX	0.423035	-1.24115	P35241	RDX	GO:0008105,asymmetric protein localization|GO:0008104,protein localization|GO:0032388,positive regulation of intracellular transport|GO:0080090,regulation of primary metabolic process|GO:0019222,regulation of metabolic process|GO:0060429,epithelium development|GO:0051049,regulation of transport|GO:0032386,regulation of intracellular transport|GO:0048468,cell development|GO:0008064,regulation of a…	GO:0045177,apical part of cell|GO:0097610,cell surface furrow|GO:0019898,extrinsic component of membrane|GO:0030175,filopodium|GO:0043229,intracellular organelle|GO:0043228,non-membrane-bounded organelle|GO:0005924,cell-substrate adherens junction|GO:0005925,focal adhesion|GO:0043227,membrane-bounded organelle|GO:0043226,organelle|GO:0030054,cell junction|GO:0030055,cell-substrate junction|GO:000…	GO:0005515,protein binding|GO:0008092,cytoskeletal protein binding|GO:0097159,organic cyclic compound binding|GO:0044822,poly(A) RNA binding|GO:0003779,actin binding|GO:0003723,RNA binding|GO:0003676,nucleic acid binding|GO:1901363,heterocyclic compound binding|GO:0005488,binding|GO:0019899,enzyme binding|GO:0051018,protein kinase A binding|GO:0045296,cadherin binding|GO:0042803,protein homodimer…	hsa04530,Tight junction|hsa05205,Proteoglycans in cancer|hsa05206,MicroRNAs in cancer|hsa04810,Regulation of actin cytoskeleton			http://www.uniprot.org/uniprot/P35241	False
CTPS1	0.404913	-1.30431	P17812	CTPS1	GO:0009218,pyrimidine ribonucleotide metabolic process|GO:0009165,nucleotide biosynthetic process|GO:0009163,nucleoside biosynthetic process|GO:0046134,pyrimidine nucleoside biosynthetic process|GO:1901362,organic cyclic compound biosynthetic process|GO:0046131,pyrimidine ribonucleoside metabolic process|GO:0046132,pyrimidine ribonucleoside biosynthetic process|GO:0044710,single-organism metaboli…	GO:0005737,cytoplasm|GO:0005829,cytosol|GO:0016020,membrane|GO:0044464,cell part|GO:0005623,cell|GO:0005622,intracellular|GO:0044444,cytoplasmic part|GO:0044424,intracellular part|GO:0097268,cytoophidium	GO:0035639,purine ribonucleoside triphosphate binding|GO:0005488,binding|GO:0043167,ion binding|GO:1901363,heterocyclic compound binding|GO:1901265,nucleoside phosphate binding|GO:0001882,nucleoside binding|GO:0043168,anion binding|GO:0000166,nucleotide binding|GO:0016879,ligase activity, forming carbon-nitrogen bonds|GO:0003883,CTP synthase activity|GO:0001883,purine nucleoside binding|GO:003254…	hsa01100,Metabolic pathways|hsa00240,Pyrimidine metabolism			http://www.uniprot.org/uniprot/P17812	False
PDCD5	0.395789	-1.3372	O14737	PDCD5	GO:2001235,positive regulation of apoptotic signaling pathway|GO:0008104,protein localization|GO:0032388,positive regulation of intracellular transport|GO:0080090,regulation of primary metabolic process|GO:0019222,regulation of metabolic process|GO:2001233,regulation of apoptotic signaling pathway|GO:0051049,regulation of transport|GO:0032386,regulation of intracellular transport|GO:0048584,posit…	GO:0043231,intracellular membrane-bounded organelle|GO:0005737,cytoplasm|GO:0005622,intracellular|GO:0043230,extracellular organelle|GO:0031982,vesicle|GO:0044421,extracellular region part|GO:0043227,membrane-bounded organelle|GO:0005634,nucleus|GO:0044464,cell part|GO:0005623,cell|GO:0031988,membrane-bounded vesicle|GO:0043229,intracellular organelle|GO:0005576,extracellular region|GO:0044424,in…	GO:1901681,sulfur compound binding|GO:0043168,anion binding|GO:0015631,tubulin binding|GO:0005515,protein binding|GO:0048487,beta-tubulin binding|GO:0097367,carbohydrate derivative binding|GO:0097159,organic cyclic compound binding|GO:0030234,enzyme regulator activity|GO:0008092,cytoskeletal protein binding|GO:0008201,heparin binding|GO:0005539,glycosaminoglycan binding|GO:0043167,ion binding|GO:…				http://www.uniprot.org/uniprot/O14737	False
HGS	0.354638	-1.49558	O14964	HGS	GO:0006887,exocytosis|GO:0019220,regulation of phosphate metabolic process|GO:0080090,regulation of primary metabolic process|GO:0019222,regulation of metabolic process|GO:0051047,positive regulation of secretion|GO:0051049,regulation of transport|GO:0048585,negative regulation of response to stimulus|GO:0048583,regulation of response to stimulus|GO:0061024,membrane organization|GO:0008104,protei…	GO:0016020,membrane|GO:0044421,extracellular region part|GO:0043229,intracellular organelle|GO:0043227,membrane-bounded organelle|GO:0043226,organelle|GO:0010008,endosome membrane|GO:0005737,cytoplasm|GO:0070062,extracellular exosome|GO:0016023,cytoplasmic, membrane-bounded vesicle|GO:0031410,cytoplasmic vesicle|GO:0005771,multivesicular body|GO:0005770,late endosome|GO:0031988,membrane-bounded v…	GO:0043169,cation binding|GO:0043167,ion binding|GO:0005488,binding|GO:0005515,protein binding|GO:0046872,metal ion binding|GO:0019904,protein domain specific binding|GO:0044389,ubiquitin-like protein ligase binding|GO:0019899,enzyme binding	hsa04145,Phagosome|hsa04144,Endocytosis			http://www.uniprot.org/uniprot/O14964	False
GSTT1	0.315095	-1.66614	P30711	GSTT1	GO:0006805,xenobiotic metabolic process|GO:0034641,cellular nitrogen compound metabolic process|GO:0006807,nitrogen compound metabolic process|GO:0044281,small molecule metabolic process|GO:0070887,cellular response to chemical stimulus|GO:1901566,organonitrogen compound biosynthetic process|GO:0044699,single-organism process|GO:1901576,organic substance biosynthetic process|GO:0044710,single-org…	GO:0005737,cytoplasm|GO:0005622,intracellular|GO:0043230,extracellular organelle|GO:0031982,vesicle|GO:0044421,extracellular region part|GO:0043227,membrane-bounded organelle|GO:0005829,cytosol|GO:0044464,cell part|GO:0005623,cell|GO:0031988,membrane-bounded vesicle|GO:0044444,cytoplasmic part|GO:0005576,extracellular region|GO:0044424,intracellular part|GO:1903561,extracellular vesicle|GO:006501…	GO:0004364,glutathione transferase activity|GO:0003824,catalytic activity|GO:0016209,antioxidant activity|GO:0016765,transferase activity, transferring alkyl or aryl (other than methyl) groups|GO:0016740,transferase activity|GO:0016684,oxidoreductase activity, acting on peroxide as acceptor|GO:0004601,peroxidase activity|GO:0004602,glutathione peroxidase activity|GO:0016491,oxidoreductase activit…	hsa00980,Metabolism of xenobiotics by cytochrome P450|hsa00983,Drug metabolism - other enzymes|hsa00982,Drug metabolism - cytochrome P450|hsa05204,Chemical carcinogenesis|hsa01100,Metabolic pathways|hsa01524,Platinum drug resistance|hsa05200,Pathways in cancer|hsa05418,Fluid shear stress and atherosclerosis|hsa05225,Hepatocellular carcinoma|hsa00480,Glutathione metabolism			http://www.uniprot.org/uniprot/P30711	False
EIF2S1	0.285851	-1.80666	P05198	EIF2S1	GO:0080090,regulation of primary metabolic process|GO:0019222,regulation of metabolic process|GO:0048584,positive regulation of response to stimulus|GO:0048583,regulation of response to stimulus|GO:0098779,mitophagy in response to mitochondrial depolarization|GO:0007165,signal transduction|GO:0031347,regulation of defense response|GO:0050688,regulation of defense response to virus|GO:0044712,sing…	GO:0035770,ribonucleoprotein granule|GO:0043229,intracellular organelle|GO:0043228,non-membrane-bounded organelle|GO:0036464,cytoplasmic ribonucleoprotein granule|GO:0030529,intracellular ribonucleoprotein complex|GO:0043227,membrane-bounded organelle|GO:0043226,organelle|GO:0005737,cytoplasm|GO:0043614,multi-eIF complex|GO:0031982,vesicle|GO:0005850,eukaryotic translation initiation factor 2 com…	GO:0005488,binding|GO:0005515,protein binding|GO:0097159,organic cyclic compound binding|GO:0044822,poly(A) RNA binding|GO:0008135,translation factor activity, RNA binding|GO:0044877,macromolecular complex binding|GO:0003723,RNA binding|GO:0003676,nucleic acid binding|GO:0043021,ribonucleoprotein complex binding|GO:0043022,ribosome binding|GO:1901363,heterocyclic compound binding|GO:0003743,trans…	hsa05162,Measles|hsa04141,Protein processing in endoplasmic reticulum|hsa04140,Regulation of autophagy|hsa05168,Herpes simplex infection|hsa03013,RNA transport|hsa05164,Influenza A|hsa04210,Apoptosis|hsa05160,Hepatitis C|hsa04932,Non-alcoholic fatty liver disease (NAFLD)			http://www.uniprot.org/uniprot/P05198	False
AP2M1	0.28429	-1.81456	Q96CW1	AP2M1	GO:0002495,antigen processing and presentation of peptide antigen via MHC class II|GO:0008104,protein localization|GO:0050688,regulation of defense response to virus|GO:0048585,negative regulation of response to stimulus|GO:0048583,regulation of response to stimulus|GO:0061024,membrane organization|GO:0007009,plasma membrane organization|GO:0007165,signal transduction|GO:0007166,cell surface rece…	GO:0098796,membrane protein complex|GO:0000323,lytic vacuole|GO:0044464,cell part|GO:0030139,endocytic vesicle|GO:0043229,intracellular organelle|GO:0071944,cell periphery|GO:0030117,membrane coat|GO:0005905,clathrin-coated pit|GO:0005773,vacuole|GO:0030131,clathrin adaptor complex|GO:0030119,AP-type membrane coat adaptor complex|GO:0005774,vacuolar membrane|GO:0030135,coated vesicle|GO:0043226,o…	GO:0030674,protein binding, bridging|GO:0042277,peptide binding|GO:0005048,signal sequence binding|GO:0005215,transporter activity|GO:0008289,lipid binding|GO:0070325,lipoprotein particle receptor binding|GO:0098748,endocytic adaptor activity|GO:0005488,binding|GO:0005515,protein binding|GO:0033218,amide binding|GO:0030276,clathrin binding|GO:0005102,receptor binding|GO:0050750,low-density lipopr…	hsa04721,Synaptic vesicle cycle|hsa05016,Huntington's disease|hsa04961,Endocrine and other factor-regulated calcium reabsorption|hsa04144,Endocytosis			http://www.uniprot.org/uniprot/Q96CW1	False
PYCR3	0.2669	-1.90563	Q53H96	PYCR3	GO:0044283,small molecule biosynthetic process|GO:0019752,carboxylic acid metabolic process|GO:0044249,cellular biosynthetic process|GO:0006807,nitrogen compound metabolic process|GO:0044281,small molecule metabolic process|GO:0009064,glutamine family amino acid metabolic process|GO:0055129,L-proline biosynthetic process|GO:1901362,organic cyclic compound biosynthetic process|GO:0044699,single-or…	GO:0005737,cytoplasm|GO:0005829,cytosol|GO:0044464,cell part|GO:0005623,cell|GO:0005622,intracellular|GO:0044444,cytoplasmic part|GO:0044424,intracellular part	GO:0004735,pyrroline-5-carboxylate reductase activity|GO:0016645,oxidoreductase activity, acting on the CH-NH group of donors|GO:0016646,oxidoreductase activity, acting on the CH-NH group of donors, NAD or NADP as acceptor|GO:0003824,catalytic activity|GO:0005488,binding|GO:0005515,protein binding|GO:0016491,oxidoreductase activity	hsa01230,Biosynthesis of amino acids|hsa01100,Metabolic pathways|hsa00330,Arginine and proline metabolism			http://www.uniprot.org/uniprot/Q53H96	False
CLIC2	0.188982	-2.40368	O15247	CLIC2	GO:0051049,regulation of transport|GO:0032386,regulation of intracellular transport|GO:0051282,regulation of sequestering of calcium ion|GO:0051283,negative regulation of sequestering of calcium ion|GO:0032845,negative regulation of homeostatic process|GO:0032844,regulation of homeostatic process|GO:0006820,anion transport|GO:0006821,chloride transport|GO:0007165,signal transduction|GO:0098771,in…	GO:0034707,chloride channel complex|GO:0043229,intracellular organelle|GO:0034702,ion channel complex|GO:0043227,membrane-bounded organelle|GO:0043226,organelle|GO:0031224,intrinsic component of membrane|GO:0005737,cytoplasm|GO:0016021,integral component of membrane|GO:0016020,membrane|GO:1902495,transmembrane transporter complex|GO:1990351,transporter complex|GO:0043234,protein complex|GO:003299…	GO:0005488,binding|GO:0016491,oxidoreductase activity|GO:0004364,glutathione transferase activity|GO:0008509,anion transmembrane transporter activity|GO:0016765,transferase activity, transferring alkyl or aryl (other than methyl) groups|GO:0016740,transferase activity|GO:0015103,inorganic anion transmembrane transporter activity|GO:0022803,passive transmembrane transporter activity|GO:0016684,oxi…				http://www.uniprot.org/uniprot/O15247	False
EEF2	0.118026	-3.08282	P13639	EEF2	GO:0080090,regulation of primary metabolic process|GO:0019222,regulation of metabolic process|GO:0044710,single-organism metabolic process|GO:0044711,single-organism biosynthetic process|GO:0010604,positive regulation of macromolecule metabolic process|GO:0010608,posttranscriptional regulation of gene expression|GO:0043043,peptide biosynthetic process|GO:0002244,hematopoietic progenitor cell diff…	GO:0016234,inclusion body|GO:0016235,aggresome|GO:0043229,intracellular organelle|GO:0071944,cell periphery|GO:0030529,intracellular ribonucleoprotein complex|GO:0043227,membrane-bounded organelle|GO:0043226,organelle|GO:0005737,cytoplasm|GO:0031982,vesicle|GO:0005634,nucleus|GO:0016020,membrane|GO:0031988,membrane-bounded vesicle|GO:0005886,plasma membrane|GO:0032991,macromolecular complex|GO:19…	GO:0035639,purine ribonucleoside triphosphate binding|GO:0019899,enzyme binding|GO:0005488,binding|GO:0003676,nucleic acid binding|GO:0043167,ion binding|GO:1901363,heterocyclic compound binding|GO:0001883,purine nucleoside binding|GO:0001882,nucleoside binding|GO:0043168,anion binding|GO:0016462,pyrophosphatase activity|GO:0000166,nucleotide binding|GO:0032561,guanyl ribonucleotide binding|GO:19…	hsa04152,AMPK signaling pathway|hsa04921,Oxytocin signaling pathway			http://www.uniprot.org/uniprot/P13639	False
EHBP1L1	0.103209	-3.27636	Q8N3D4	EHBP1L1	GO:0006996,organelle organization|GO:0007010,cytoskeleton organization|GO:0030029,actin filament-based process|GO:0009987,cellular process|GO:0016043,cellular component organization|GO:0030036,actin cytoskeleton organization|GO:0071840,cellular component organization or biogenesis	GO:0016020,membrane|GO:0005768,endosome|GO:0005737,cytoplasm|GO:0031982,vesicle|GO:0031410,cytoplasmic vesicle|GO:0044464,cell part|GO:0005623,cell|GO:0005622,intracellular|GO:0044444,cytoplasmic part|GO:0097708,intracellular vesicle|GO:0044424,intracellular part|GO:0043227,membrane-bounded organelle|GO:0043226,organelle|GO:0012505,endomembrane system|GO:0043229,intracellular organelle|GO:0099512…					http://www.uniprot.org/uniprot/Q8N3D4	False
VAPA	0.0738421	-3.75941	Q9P0L0	VAPA	GO:0008104,protein localization|GO:0048584,positive regulation of response to stimulus|GO:0048583,regulation of response to stimulus|GO:0006900,membrane budding|GO:0061025,membrane fusion|GO:0061024,membrane organization|GO:0007165,signal transduction|GO:1901576,organic substance biosynthetic process|GO:0071840,cellular component organization or biogenesis|GO:0044710,single-organism metabolic pro…	GO:0005783,endoplasmic reticulum|GO:0005789,endoplasmic reticulum membrane|GO:0042175,nuclear outer membrane-endoplasmic reticulum membrane network|GO:0043229,intracellular organelle|GO:0043228,non-membrane-bounded organelle|GO:0005622,intracellular|GO:0043227,membrane-bounded organelle|GO:0005923,bicellular tight junction|GO:0030054,cell junction|GO:0070971,endoplasmic reticulum exit site|GO:003…	GO:0015631,tubulin binding|GO:0005515,protein binding|GO:0008092,cytoskeletal protein binding|GO:0008017,microtubule binding|GO:0033149,FFAT motif binding|GO:0060089,molecular transducer activity|GO:0044877,macromolecular complex binding|GO:0019904,protein domain specific binding|GO:0004871,signal transducer activity|GO:0032403,protein complex binding|GO:0046983,protein dimerization activity|GO:0…	hsa04979,Cholesterol metabolism			http://www.uniprot.org/uniprot/Q9P0L0	False
CSNK2A1	0.0257003	-5.28207	P68400	CSNK2A1	GO:0080090,regulation of primary metabolic process|GO:0032434,regulation of proteasomal ubiquitin-dependent protein catabolic process|GO:0032435,negative regulation of proteasomal ubiquitin-dependent protein catabolic process|GO:0048584,positive regulation of response to stimulus|GO:0048583,regulation of response to stimulus|GO:0044257,cellular protein catabolic process|GO:0030111,regulation of W…	GO:0031974,membrane-enclosed lumen|GO:0043229,intracellular organelle|GO:0043228,non-membrane-bounded organelle|GO:0000785,chromatin|GO:0000228,nuclear chromosome|GO:0043227,membrane-bounded organelle|GO:0043226,organelle|GO:0005737,cytoplasm|GO:0070822,Sin3-type complex|GO:0070603,SWI/SNF superfamily-type complex|GO:0031519,PcG protein complex|GO:0031981,nuclear lumen|GO:0005634,nucleus|GO:00160…	GO:0035639,purine ribonucleoside triphosphate binding|GO:0031072,heat shock protein binding|GO:0004672,protein kinase activity|GO:0043167,ion binding|GO:1901363,heterocyclic compound binding|GO:0001883,purine nucleoside binding|GO:0001882,nucleoside binding|GO:0043168,anion binding|GO:0000166,nucleotide binding|GO:0004674,protein serine/threonine kinase activity|GO:0016740,transferase activity|GO…	hsa03008,Ribosome biogenesis in eukaryotes|hsa05235,unkown|hsa04137,unkown|hsa04520,Adherens junction|hsa04064,NF-kappa B signaling pathway|hsa04310,Wnt signaling pathway|hsa05162,Measles			http://www.uniprot.org/uniprot/P68400	False
MAPK1IP1L	0.0128357	-6.28369	Q8NDC0	MAPK1IP1L			GO:0005488,binding|GO:0005515,protein binding				http://www.uniprot.org/uniprot/Q8NDC0	False
