# Supplementary material for: Proteome expression profiling of red blood cells during the tumorigenesis of hepatocellular carcinoma
Source: PLoS One. 2022 Nov 8;17(11):e0276904. doi: 10.1371/journal.pone.0276904 (PMC9642896; doi:10.1371/journal.pone.0276904)
Supplement: S7 Table — (XLSX) [file pone.0276904.s007.xlsx]

## Sheet: HCC VS HC
ID	FoldChange	Log2FoldChange	Uniprot	Genename	Biological Process	Cell Component	Molecular Function	KEGG Pathways	Disease	Drug	UNIPROT_URL	Transcription Factor
SUGT1	198.337	7.63181	Q9Y2Z0	SUGT1	GO:0009893,positive regulation of metabolic process|GO:0019222,regulation of metabolic process|GO:0006955,immune response|GO:1903047,mitotic cell cycle process|GO:0023052,signaling|GO:0007165,signal transduction|GO:0051702,interaction with symbiont|GO:0052203,modulation of catalytic activity in other organism involved in symbiotic interaction|GO:0007067,mitotic nuclear division|GO:0050789,regulat…	GO:0043229,intracellular organelle|GO:0043228,non-membrane-bounded organelle|GO:0043227,membrane-bounded organelle|GO:0043226,organelle|GO:0005737,cytoplasm|GO:0005634,nucleus|GO:0098687,chromosomal region|GO:0005694,chromosome|GO:1902494,catalytic complex|GO:1990234,transferase complex|GO:0000775,chromosome, centromeric region|GO:0000776,kinetochore|GO:0043234,protein complex|GO:0032991,macromol…	GO:0005488,binding|GO:0005515,protein binding	hsa04621,NOD-like receptor signaling pathway			http://www.uniprot.org/uniprot/Q9Y2Z0	False
PRSS1	100.329	6.64859	P07477	PRSS1	GO:0009235,cobalamin metabolic process|GO:0006766,vitamin metabolic process|GO:0006807,nitrogen compound metabolic process|GO:0044281,small molecule metabolic process|GO:0071840,cellular component organization or biogenesis|GO:0044710,single-organism metabolic process|GO:1901360,organic cyclic compound metabolic process|GO:0016043,cellular component organization|GO:0071704,organic substance metab…	GO:0043230,extracellular organelle|GO:0031982,vesicle|GO:0044421,extracellular region part|GO:0043227,membrane-bounded organelle|GO:0072562,blood microparticle|GO:0031988,membrane-bounded vesicle|GO:0005576,extracellular region|GO:0005615,extracellular space|GO:1903561,extracellular vesicle|GO:0065010,extracellular membrane-bounded organelle|GO:0043226,organelle|GO:0070062,extracellular exosome|G…	GO:0004252,serine-type endopeptidase activity|GO:0004175,endopeptidase activity|GO:0017171,serine hydrolase activity|GO:0016787,hydrolase activity|GO:0043169,cation binding|GO:0043167,ion binding|GO:0003824,catalytic activity|GO:0070011,peptidase activity, acting on L-amino acid peptides|GO:0005488,binding|GO:0008233,peptidase activity|GO:0046872,metal ion binding|GO:0008236,serine-type peptidase…	hsa05164,Influenza A|hsa04974,Protein digestion and absorption|hsa04972,Pancreatic secretion|hsa04080,Neuroactive ligand-receptor interaction		D05183,Ulinastatin (JP16); Miraclid (TN)	http://www.uniprot.org/uniprot/P07477	False
SRXN1	45.0533	5.49356	Q9BYN0	SRXN1	GO:0044710,single-organism metabolic process|GO:0050896,response to stimulus|GO:0006950,response to stress|GO:0055114,oxidation-reduction process|GO:0008152,metabolic process|GO:0006979,response to oxidative stress|GO:0044699,single-organism process|GO:0070887,cellular response to chemical stimulus|GO:0009987,cellular process|GO:0009636,response to toxic substance|GO:0051716,cellular response to …	GO:0005737,cytoplasm|GO:0005829,cytosol|GO:0044464,cell part|GO:0005623,cell|GO:0005622,intracellular|GO:0044444,cytoplasmic part|GO:0044424,intracellular part	GO:0035639,purine ribonucleoside triphosphate binding|GO:0005488,binding|GO:0000166,nucleotide binding|GO:1901363,heterocyclic compound binding|GO:1901265,nucleoside phosphate binding|GO:0001882,nucleoside binding|GO:0043168,anion binding|GO:0043167,ion binding|GO:0001883,purine nucleoside binding|GO:0016667,oxidoreductase activity, acting on a sulfur group of donors|GO:0032549,ribonucleoside bin…				http://www.uniprot.org/uniprot/Q9BYN0	False
TANC2	36.0324	5.17122	Q9HCD6	TANC2	GO:0032502,developmental process|GO:0001701,in utero embryonic development|GO:0044707,single-multicellular organism process|GO:0032501,multicellular organismal process|GO:0048856,anatomical structure development|GO:0044767,single-organism developmental process|GO:0009790,embryo development|GO:0009792,embryo development ending in birth or egg hatching|GO:0043009,chordate embryonic development|GO:0…	GO:0043228,non-membrane-bounded organelle|GO:0005623,cell|GO:0044464,cell part|GO:0099572,postsynaptic specialization|GO:0032279,asymmetric synapse|GO:0097458,neuron part|GO:0098794,postsynapse|GO:0014069,postsynaptic density|GO:0099092,postsynaptic density, intracellular component|GO:0099091,postsynaptic specialization, intracellular component|GO:0044456,synapse part|GO:0098984,neuron to neuron …					http://www.uniprot.org/uniprot/Q9HCD6	False
PPP6R1	35.0206	5.13013	Q9UPN7	PPP6R1	GO:0019220,regulation of phosphate metabolic process|GO:0080090,regulation of primary metabolic process|GO:0019222,regulation of metabolic process|GO:0016311,dephosphorylation|GO:0010921,regulation of phosphatase activity|GO:0031323,regulation of cellular metabolic process|GO:0031399,regulation of protein modification process|GO:0050789,regulation of biological process|GO:0044267,cellular protein…	GO:0005737,cytoplasm|GO:0044464,cell part|GO:0005623,cell|GO:0005622,intracellular|GO:0044424,intracellular part|GO:0043229,intracellular organelle|GO:0043227,membrane-bounded organelle|GO:0043226,organelle|GO:0031984,organelle subcompartment|GO:0031090,organelle membrane|GO:0016020,membrane|GO:0044431,Golgi apparatus part|GO:0005794,Golgi apparatus|GO:0098588,bounding membrane of organelle|GO:00…	GO:0019899,enzyme binding|GO:0019903,protein phosphatase binding|GO:0019902,phosphatase binding|GO:0005488,binding|GO:0005515,protein binding|GO:0031267,small GTPase binding|GO:0051020,GTPase binding|GO:0017048,Rho GTPase binding|GO:0017016,Ras GTPase binding				http://www.uniprot.org/uniprot/Q9UPN7	False
HGS	15.9791	3.99811	O14964	HGS	GO:0006887,exocytosis|GO:0019220,regulation of phosphate metabolic process|GO:0080090,regulation of primary metabolic process|GO:0019222,regulation of metabolic process|GO:0051047,positive regulation of secretion|GO:0051049,regulation of transport|GO:0048585,negative regulation of response to stimulus|GO:0048583,regulation of response to stimulus|GO:0061024,membrane organization|GO:0008104,protei…	GO:0016020,membrane|GO:0044421,extracellular region part|GO:0043229,intracellular organelle|GO:0043227,membrane-bounded organelle|GO:0043226,organelle|GO:0010008,endosome membrane|GO:0005737,cytoplasm|GO:0070062,extracellular exosome|GO:0016023,cytoplasmic, membrane-bounded vesicle|GO:0031410,cytoplasmic vesicle|GO:0005771,multivesicular body|GO:0005770,late endosome|GO:0031988,membrane-bounded v…	GO:0043169,cation binding|GO:0043167,ion binding|GO:0005488,binding|GO:0005515,protein binding|GO:0046872,metal ion binding|GO:0019904,protein domain specific binding|GO:0044389,ubiquitin-like protein ligase binding|GO:0019899,enzyme binding	hsa04145,Phagosome|hsa04144,Endocytosis			http://www.uniprot.org/uniprot/O14964	False
HPS1	14.924	3.89957	Q92902	HPS1	GO:0006996,organelle organization|GO:0007033,vacuole organization|GO:0032501,multicellular organismal process|GO:0044707,single-multicellular organism process|GO:0050877,neurological system process|GO:0071840,cellular component organization or biogenesis|GO:0009987,cellular process|GO:0007601,visual perception|GO:0007600,sensory perception|GO:0050953,sensory perception of light stimulus|GO:008017…	GO:0000323,lytic vacuole|GO:0043229,intracellular organelle|GO:0071944,cell periphery|GO:0031226,intrinsic component of plasma membrane|GO:0043226,organelle|GO:0031224,intrinsic component of membrane|GO:0005737,cytoplasm|GO:0031982,vesicle|GO:0016023,cytoplasmic, membrane-bounded vesicle|GO:0031410,cytoplasmic vesicle|GO:0016021,integral component of membrane|GO:0016020,membrane|GO:0044444,cytopl…	GO:0046983,protein dimerization activity|GO:0005488,binding|GO:0005515,protein binding|GO:0005085,guanyl-nucleotide exchange factor activity|GO:0098772,molecular function regulator|GO:0019899,enzyme binding|GO:0051020,GTPase binding				http://www.uniprot.org/uniprot/Q92902	False
KRT10	9.12168	3.1893	P13645	KRT10	GO:0071248,cellular response to metal ion|GO:0030154,cell differentiation|GO:0071241,cellular response to inorganic substance|GO:0070887,cellular response to chemical stimulus|GO:0008544,epidermis development|GO:0007275,multicellular organism development|GO:0044699,single-organism process|GO:0051716,cellular response to stimulus|GO:0048869,cellular developmental process|GO:0048513,animal organ de…	GO:0045095,keratin filament|GO:0043229,intracellular organelle|GO:0043228,non-membrane-bounded organelle|GO:0043227,membrane-bounded organelle|GO:0043226,organelle|GO:0005856,cytoskeleton|GO:0045111,intermediate filament cytoskeleton|GO:0031982,vesicle|GO:0005615,extracellular space|GO:0005634,nucleus|GO:0016020,membrane|GO:0031988,membrane-bounded vesicle|GO:0044430,cytoskeletal part|GO:0005737,…	GO:0005198,structural molecule activity|GO:0030280,structural constituent of epidermis|GO:0046983,protein dimerization activity|GO:0046982,protein heterodimerization activity|GO:0005488,binding|GO:0005515,protein binding	hsa05150,Staphylococcus aureus infection|hsa04915,Estrogen signaling pathway			http://www.uniprot.org/uniprot/P13645	False
HIST1H2BK	8.52905	3.09238	O60814	HIST1H2BK	GO:0034728,nucleosome organization|GO:0071103,DNA conformation change|GO:0022607,cellular component assembly|GO:0019730,antimicrobial humoral response|GO:0070271,protein complex biogenesis|GO:0043933,macromolecular complex subunit organization|GO:0016043,cellular component organization|GO:0031497,chromatin assembly|GO:0034622,cellular macromolecular complex assembly|GO:0071840,cellular component …	GO:0031974,membrane-enclosed lumen|GO:0044815,DNA packaging complex|GO:0043229,intracellular organelle|GO:0043228,non-membrane-bounded organelle|GO:0000785,chromatin|GO:0000786,nucleosome|GO:0000788,nuclear nucleosome|GO:0000228,nuclear chromosome|GO:0043227,membrane-bounded organelle|GO:0043226,organelle|GO:0005615,extracellular space|GO:0031981,nuclear lumen|GO:0005634,nucleus|GO:0005654,nucleo…	GO:0003676,nucleic acid binding|GO:0097159,organic cyclic compound binding|GO:0005488,binding|GO:0005515,protein binding|GO:0003677,DNA binding|GO:0046983,protein dimerization activity|GO:0046982,protein heterodimerization activity|GO:1901363,heterocyclic compound binding	hsa05322,Systemic lupus erythematosus|hsa05203,Viral carcinogenesis|hsa05034,Alcoholism			http://www.uniprot.org/uniprot/O60814	False
ANXA7	6.23994	2.64153	P20073	ANXA7	GO:0022604,regulation of cell morphogenesis|GO:0009992,cellular water homeostasis|GO:0009628,response to abiotic stimulus|GO:0009892,negative regulation of metabolic process|GO:0008152,metabolic process|GO:0019222,regulation of metabolic process|GO:0022603,regulation of anatomical structure morphogenesis|GO:0050801,ion homeostasis|GO:0030154,cell differentiation|GO:0007610,behavior|GO:0051128,reg…	GO:0016020,membrane|GO:0005783,endoplasmic reticulum|GO:0044421,extracellular region part|GO:0005789,endoplasmic reticulum membrane|GO:0042175,nuclear outer membrane-endoplasmic reticulum membrane network|GO:0043229,intracellular organelle|GO:0071944,cell periphery|GO:0043227,membrane-bounded organelle|GO:0043226,organelle|GO:0005737,cytoplasm|GO:0030667,secretory granule membrane|GO:0070062,extr…	GO:0048306,calcium-dependent protein binding|GO:0005488,binding|GO:0003676,nucleic acid binding|GO:1901363,heterocyclic compound binding|GO:0043168,anion binding|GO:0043169,cation binding|GO:0005543,phospholipid binding|GO:0005544,calcium-dependent phospholipid binding|GO:0043167,ion binding|GO:0005509,calcium ion binding|GO:0032403,protein complex binding|GO:0046872,metal ion binding|GO:0005178,…				http://www.uniprot.org/uniprot/P20073	False
YWHAQ	5.55873	2.47476	P27348	YWHAQ	GO:2001235,positive regulation of apoptotic signaling pathway|GO:0008104,protein localization|GO:0032388,positive regulation of intracellular transport|GO:0080090,regulation of primary metabolic process|GO:0019222,regulation of metabolic process|GO:2001233,regulation of apoptotic signaling pathway|GO:0051049,regulation of transport|GO:0032386,regulation of intracellular transport|GO:0048584,posit…	GO:0043229,intracellular organelle|GO:0005924,cell-substrate adherens junction|GO:0005925,focal adhesion|GO:0043227,membrane-bounded organelle|GO:0043226,organelle|GO:0030054,cell junction|GO:0030055,cell-substrate junction|GO:0005737,cytoplasm|GO:0070062,extracellular exosome|GO:0016023,cytoplasmic, membrane-bounded vesicle|GO:0031410,cytoplasmic vesicle|GO:0016020,membrane|GO:0031988,membrane-b…	GO:0008022,protein C-terminus binding|GO:0047485,protein N-terminus binding|GO:0071889,14-3-3 protein binding|GO:0019904,protein domain specific binding|GO:0005515,protein binding|GO:0044325,ion channel binding|GO:0005488,binding|GO:0042802,identical protein binding	hsa04110,Cell cycle|hsa04114,Oocyte meiosis|hsa04390,Hippo signaling pathway|hsa05203,Viral carcinogenesis|hsa05160,Hepatitis C|hsa05161,Hepatitis B|hsa04151,PI3K-Akt signaling pathway			http://www.uniprot.org/uniprot/P27348	False
HIST1H4A	5.05329	2.33722	P62805	HIST1H4D	GO:0080090,regulation of primary metabolic process|GO:0019222,regulation of metabolic process|GO:0060249,anatomical structure homeostasis|GO:0048534,hematopoietic or lymphoid organ development|GO:0031055,chromatin remodeling at centromere|GO:0007165,signal transduction|GO:1901362,organic cyclic compound biosynthetic process|GO:0035574,histone H4-K20 demethylation|GO:0006306,DNA methylation|GO:004…	GO:0031974,membrane-enclosed lumen|GO:0044815,DNA packaging complex|GO:0043229,intracellular organelle|GO:0043228,non-membrane-bounded organelle|GO:0000785,chromatin|GO:0000786,nucleosome|GO:0000228,nuclear chromosome|GO:0043227,membrane-bounded organelle|GO:0043226,organelle|GO:0070062,extracellular exosome|GO:0031981,nuclear lumen|GO:0005634,nucleus|GO:0016020,membrane|GO:0031988,membrane-bound…	GO:0005488,binding|GO:0042393,histone binding|GO:0005515,protein binding|GO:0003824,catalytic activity|GO:0097159,organic cyclic compound binding|GO:0044822,poly(A) RNA binding|GO:0032451,demethylase activity|GO:0032452,histone demethylase activity|GO:0003723,RNA binding|GO:0003676,nucleic acid binding|GO:0003677,DNA binding|GO:0046983,protein dimerization activity|GO:0046982,protein heterodimeri…	hsa05322,Systemic lupus erythematosus|hsa05203,Viral carcinogenesis|hsa05034,Alcoholism			http://www.uniprot.org/uniprot/P62805	False
UFM1	5.01333	2.32577	P61960	UFM1	GO:0048583,regulation of response to stimulus|GO:1990592,protein K69-linked ufmylation|GO:0023052,signaling|GO:0007165,signal transduction|GO:0023051,regulation of signaling|GO:0010646,regulation of cell communication|GO:0050789,regulation of biological process|GO:0044699,single-organism process|GO:0044267,cellular protein metabolic process|GO:0051716,cellular response to stimulus|GO:0030522,intr…	GO:0043231,intracellular membrane-bounded organelle|GO:0005737,cytoplasm|GO:0005622,intracellular|GO:0043230,extracellular organelle|GO:0031982,vesicle|GO:0044421,extracellular region part|GO:0043227,membrane-bounded organelle|GO:0005634,nucleus|GO:0044464,cell part|GO:0005623,cell|GO:0031988,membrane-bounded vesicle|GO:0043229,intracellular organelle|GO:0005576,extracellular region|GO:0044424,in…	GO:0005488,binding|GO:0005515,protein binding				http://www.uniprot.org/uniprot/P61960	False
PPCS	4.54822	2.1853	Q9HAB8	PPCS	GO:1901566,organonitrogen compound biosynthetic process|GO:0055086,nucleobase-containing small molecule metabolic process|GO:0015936,coenzyme A metabolic process|GO:0015937,coenzyme A biosynthetic process|GO:0006732,coenzyme metabolic process|GO:0015939,pantothenate metabolic process|GO:0044249,cellular biosynthetic process|GO:0034641,cellular nitrogen compound metabolic process|GO:0009165,nucleo…	GO:0005737,cytoplasm|GO:0005622,intracellular|GO:0043230,extracellular organelle|GO:0031982,vesicle|GO:0044421,extracellular region part|GO:0043227,membrane-bounded organelle|GO:0005829,cytosol|GO:0044464,cell part|GO:0005623,cell|GO:0031988,membrane-bounded vesicle|GO:0044444,cytoplasmic part|GO:0005576,extracellular region|GO:0044424,intracellular part|GO:1903561,extracellular vesicle|GO:006501…	GO:0003824,catalytic activity|GO:0016881,acid-amino acid ligase activity|GO:0016879,ligase activity, forming carbon-nitrogen bonds|GO:0004632,phosphopantothenate--cysteine ligase activity|GO:0016874,ligase activity|GO:0005488,binding|GO:0005515,protein binding|GO:0046983,protein dimerization activity|GO:0042802,identical protein binding|GO:0042803,protein homodimerization activity|GO:0035639,puri…	hsa01100,Metabolic pathways|hsa00770,Pantothenate and CoA biosynthesis			http://www.uniprot.org/uniprot/Q9HAB8	False
CROCC2	4.41937	2.14384	H7BZ55	CROCC2							http://www.uniprot.org/uniprot/H7BZ55	False
RAD23B	3.06942	1.61797	P54727	RAD23B	GO:0009894,regulation of catabolic process|GO:0044238,primary metabolic process|GO:0080090,regulation of primary metabolic process|GO:0031329,regulation of cellular catabolic process|GO:0006950,response to stress|GO:0031323,regulation of cellular metabolic process|GO:0019953,sexual reproduction|GO:0090304,nucleic acid metabolic process|GO:0042176,regulation of protein catabolic process|GO:0006807…	GO:0031974,membrane-enclosed lumen|GO:0043229,intracellular organelle|GO:0071942,XPC complex|GO:0000109,nucleotide-excision repair complex|GO:0043227,membrane-bounded organelle|GO:0043226,organelle|GO:0005737,cytoplasm|GO:0031981,nuclear lumen|GO:0005634,nucleus|GO:0005654,nucleoplasm|GO:0000502,proteasome complex|GO:0043234,protein complex|GO:0032991,macromolecular complex|GO:0043231,intracellul…	GO:0043566,structure-specific DNA binding|GO:0005515,protein binding|GO:0003684,damaged DNA binding|GO:0097159,organic cyclic compound binding|GO:0031593,polyubiquitin binding|GO:0032182,ubiquitin-like protein binding|GO:0003697,single-stranded DNA binding|GO:0043130,ubiquitin binding|GO:0005488,binding|GO:0003676,nucleic acid binding|GO:0003677,DNA binding|GO:1901363,heterocyclic compound bindin…	hsa04141,Protein processing in endoplasmic reticulum|hsa03420,Nucleotide excision repair			http://www.uniprot.org/uniprot/P54727	False
HSP90AA1	2.67178	1.4178	P07900	HSP90AA1	GO:0008104,protein localization|GO:0006909,phagocytosis|GO:0019222,regulation of metabolic process|GO:0000086,G2/M transition of mitotic cell cycle|GO:0034605,cellular response to heat|GO:0048584,positive regulation of response to stimulus|GO:0048583,regulation of response to stimulus|GO:0009408,response to heat|GO:0061024,membrane organization|GO:0007008,outer mitochondrial membrane organization…	GO:0098590,plasma membrane region|GO:0044421,extracellular region part|GO:0048770,pigment granule|GO:0031974,membrane-enclosed lumen|GO:0030139,endocytic vesicle|GO:0043229,intracellular organelle|GO:0071944,cell periphery|GO:0060205,cytoplasmic membrane-bounded vesicle lumen|GO:0005622,intracellular|GO:0043227,membrane-bounded organelle|GO:0043226,organelle|GO:0005737,cytoplasm|GO:0044433,cytopl…	GO:0016887,ATPase activity|GO:0035639,purine ribonucleoside triphosphate binding|GO:0019899,enzyme binding|GO:0051020,GTPase binding|GO:0044877,macromolecular complex binding|GO:0005488,binding|GO:0003676,nucleic acid binding|GO:0098772,molecular function regulator|GO:1901363,heterocyclic compound binding|GO:0001883,purine nucleoside binding|GO:0001882,nucleoside binding|GO:0043168,anion binding|…	hsa04659,Th17 cell differentiation|hsa05418,Fluid shear stress and atherosclerosis|hsa04612,Antigen processing and presentation|hsa04621,NOD-like receptor signaling pathway|hsa04657,IL-17 signaling pathway|hsa05200,Pathways in cancer|hsa04141,Protein processing in endoplasmic reticulum|hsa04914,Progesterone-mediated oocyte maturation|hsa04915,Estrogen signaling pathway|hsa05215,Prostate cancer|hs…		D09375,Retaspimycin (USAN/INN)|D09376,Retaspimycin hydrochloride (USAN)|D10126,Ganetespib (USAN)|D10646,Luminespib (USAN/INN)|D10647,Luminespib mesylate (USAN)|D10719,Onalespib (USAN/INN)	http://www.uniprot.org/uniprot/P07900	False
SH3BGRL2	2.54097	1.34538	Q9UJC5	SH3BGRL2		GO:0031974,membrane-enclosed lumen|GO:0043229,intracellular organelle|GO:0043227,membrane-bounded organelle|GO:0043226,organelle|GO:0070062,extracellular exosome|GO:0031981,nuclear lumen|GO:0005634,nucleus|GO:0031988,membrane-bounded vesicle|GO:0005654,nucleoplasm|GO:1903561,extracellular vesicle|GO:0031982,vesicle|GO:0043230,extracellular organelle|GO:0043231,intracellular membrane-bounded organ…	GO:0005488,binding|GO:0017124,SH3 domain binding|GO:0005515,protein binding|GO:0019904,protein domain specific binding				http://www.uniprot.org/uniprot/Q9UJC5	False
HBA1	2.39151	1.25792	P69905	HBA2	GO:0015701,bicarbonate transport|GO:0022607,cellular component assembly|GO:0070271,protein complex biogenesis|GO:0043933,macromolecular complex subunit organization|GO:0000302,response to reactive oxygen species|GO:0044248,cellular catabolic process|GO:0006820,anion transport|GO:0042744,hydrogen peroxide catabolic process|GO:0042743,hydrogen peroxide metabolic process|GO:0044281,small molecule me…	GO:0022626,cytosolic ribosome|GO:0022627,cytosolic small ribosomal subunit|GO:0031974,membrane-enclosed lumen|GO:0030139,endocytic vesicle|GO:0043229,intracellular organelle|GO:0043228,non-membrane-bounded organelle|GO:0060205,cytoplasmic membrane-bounded vesicle lumen|GO:0005833,hemoglobin complex|GO:0043227,membrane-bounded organelle|GO:0043226,organelle|GO:0015935,small ribosomal subunit|GO:00…	GO:0005344,oxygen transporter activity|GO:0005488,binding|GO:1901363,heterocyclic compound binding|GO:0016491,oxidoreductase activity|GO:0043169,cation binding|GO:0016684,oxidoreductase activity, acting on peroxide as acceptor|GO:0046914,transition metal ion binding|GO:0043167,ion binding|GO:0005506,iron ion binding|GO:0046872,metal ion binding|GO:0020037,heme binding|GO:0005215,transporter activ…	hsa05143,African trypanosomiasis|hsa05144,Malaria	H00020,Colorectal cancer|H00022,Bladder cancer		http://www.uniprot.org/uniprot/P69905	False
MAP2K3	2.37317	1.24681	P46734	MAP2K3	GO:0019220,regulation of phosphate metabolic process|GO:0080090,regulation of primary metabolic process|GO:0019222,regulation of metabolic process|GO:0048584,positive regulation of response to stimulus|GO:0048583,regulation of response to stimulus|GO:0032147,activation of protein kinase activity|GO:0031349,positive regulation of defense response|GO:0003012,muscle system process|GO:0003013,circula…	GO:0031974,membrane-enclosed lumen|GO:0043229,intracellular organelle|GO:0043227,membrane-bounded organelle|GO:0043226,organelle|GO:0005737,cytoplasm|GO:0031981,nuclear lumen|GO:0005634,nucleus|GO:0016020,membrane|GO:0005654,nucleoplasm|GO:0043231,intracellular membrane-bounded organelle|GO:0043233,organelle lumen|GO:0005829,cytosol|GO:0044464,cell part|GO:0005623,cell|GO:0005622,intracellular|GO…	GO:0035639,purine ribonucleoside triphosphate binding|GO:0019899,enzyme binding|GO:0004672,protein kinase activity|GO:0043167,ion binding|GO:1901363,heterocyclic compound binding|GO:0001883,purine nucleoside binding|GO:0001882,nucleoside binding|GO:0043168,anion binding|GO:0019900,kinase binding|GO:0000166,nucleotide binding|GO:0004674,protein serine/threonine kinase activity|GO:0016740,transfera…	hsa04935,unkown|hsa05135,unkown|hsa05235,unkown|hsa05145,Toxoplasmosis|hsa04620,Toll-like receptor signaling pathway|hsa05014,Amyotrophic lateral sclerosis (ALS)|hsa04912,GnRH signaling pathway|hsa04218,Cellular senescence|hsa04015,Rap1 signaling pathway|hsa04664,Fc epsilon RI signaling pathway|hsa05169,Epstein-Barr virus infection|hsa04010,MAPK signaling pathway|hsa04668,TNF signaling pathway|hs…			http://www.uniprot.org/uniprot/P46734	False
HDDC2	2.355	1.23573	V9GZ04	HDDC2	GO:0016311,dephosphorylation|GO:0009987,cellular process|GO:0044237,cellular metabolic process|GO:0006796,phosphate-containing compound metabolic process|GO:0008152,metabolic process|GO:0006793,phosphorus metabolic process		GO:0016787,hydrolase activity|GO:0016791,phosphatase activity|GO:0016788,hydrolase activity, acting on ester bonds|GO:0042578,phosphoric ester hydrolase activity|GO:0003824,catalytic activity|GO:0002953,5'-deoxynucleotidase activity				http://www.uniprot.org/uniprot/V9GZ04	False
FERMT3	2.31425	1.21054	Q86UX7	FERMT3	GO:0022607,cellular component assembly|GO:0016337,single organismal cell-cell adhesion|GO:0034446,substrate adhesion-dependent cell spreading|GO:0043933,macromolecular complex subunit organization|GO:0050896,response to stimulus|GO:0030155,regulation of cell adhesion|GO:0030154,cell differentiation|GO:0048468,cell development|GO:0007596,blood coagulation|GO:0022407,regulation of cell-cell adhesio…	GO:0015629,actin cytoskeleton|GO:0043229,intracellular organelle|GO:0043228,non-membrane-bounded organelle|GO:0005623,cell|GO:0043227,membrane-bounded organelle|GO:0043226,organelle|GO:0030054,cell junction|GO:0005856,cytoskeleton|GO:0002102,podosome|GO:0031982,vesicle|GO:0016020,membrane|GO:0031988,membrane-bounded vesicle|GO:0044430,cytoskeletal part|GO:0032991,macromolecular complex|GO:0042995…	GO:0005178,integrin binding|GO:0044877,macromolecular complex binding|GO:0005488,binding|GO:0005515,protein binding|GO:0032403,protein complex binding|GO:0005102,receptor binding|GO:0050839,cell adhesion molecule binding	hsa04611,Platelet activation			http://www.uniprot.org/uniprot/Q86UX7	False
S100A8	2.29814	1.20047	P05109	S100A8	GO:0090087,regulation of peptide transport|GO:2001235,positive regulation of apoptotic signaling pathway|GO:0051234,establishment of localization|GO:0080090,regulation of primary metabolic process|GO:0019222,regulation of metabolic process|GO:2001233,regulation of apoptotic signaling pathway|GO:0051049,regulation of transport|GO:0048584,positive regulation of response to stimulus|GO:0048583,regul…	GO:0043229,intracellular organelle|GO:0071944,cell periphery|GO:0043227,membrane-bounded organelle|GO:0043226,organelle|GO:0005856,cytoskeleton|GO:0031982,vesicle|GO:0005615,extracellular space|GO:0005634,nucleus|GO:0016020,membrane|GO:0031988,membrane-bounded vesicle|GO:0005576,extracellular region|GO:0005737,cytoplasm|GO:0005886,plasma membrane|GO:1903561,extracellular vesicle|GO:0070062,extrac…	GO:0050786,RAGE receptor binding|GO:0044877,macromolecular complex binding|GO:0008270,zinc ion binding|GO:0036041,long-chain fatty acid binding|GO:0043168,anion binding|GO:0043169,cation binding|GO:0046914,transition metal ion binding|GO:0043167,ion binding|GO:0005509,calcium ion binding|GO:0005504,fatty acid binding|GO:0046872,metal ion binding|GO:0035662,Toll-like receptor 4 binding|GO:0015631,…	hsa04657,IL-17 signaling pathway			http://www.uniprot.org/uniprot/P05109	False
IRGQ	2.25939	1.17593	Q8WZA9	IRGQ			GO:0043168,anion binding|GO:0005488,binding|GO:0019001,guanyl nucleotide binding|GO:0035639,purine ribonucleoside triphosphate binding|GO:0097367,carbohydrate derivative binding|GO:0043167,ion binding|GO:1901363,heterocyclic compound binding|GO:1901265,nucleoside phosphate binding|GO:0000166,nucleotide binding|GO:0036094,small molecule binding|GO:0032561,guanyl ribonucleotide binding|GO:0032553,r…				http://www.uniprot.org/uniprot/Q8WZA9	False
ACTN4	2.2403	1.16369	O43707	ACTN4	GO:0044238,primary metabolic process|GO:0007599,hemostasis|GO:0080090,regulation of primary metabolic process|GO:0019222,regulation of metabolic process|GO:0034446,substrate adhesion-dependent cell spreading|GO:0051049,regulation of transport|GO:0006907,pinocytosis|GO:0048584,positive regulation of response to stimulus|GO:0048583,regulation of response to stimulus|GO:0007162,negative regulation o…	GO:0032432,actin filament bundle|GO:0015629,actin cytoskeleton|GO:0031974,membrane-enclosed lumen|GO:0030016,myofibril|GO:0030017,sarcomere|GO:0043229,intracellular organelle|GO:0043228,non-membrane-bounded organelle|GO:0060205,cytoplasmic membrane-bounded vesicle lumen|GO:0005924,cell-substrate adherens junction|GO:0005925,focal adhesion|GO:0043227,membrane-bounded organelle|GO:0043226,organelle…	GO:0001012,RNA polymerase II regulatory region DNA binding|GO:0031490,chromatin DNA binding|GO:0044877,macromolecular complex binding|GO:0005488,binding|GO:0003676,nucleic acid binding|GO:0003677,DNA binding|GO:0044325,ion channel binding|GO:1901363,heterocyclic compound binding|GO:0001882,nucleoside binding|GO:0043565,sequence-specific DNA binding|GO:0043566,structure-specific DNA binding|GO:000…	hsa05322,Systemic lupus erythematosus|hsa05203,Viral carcinogenesis|hsa04530,Tight junction|hsa04670,Leukocyte transendothelial migration|hsa05146,Amoebiasis|hsa04510,Focal adhesion|hsa04520,Adherens junction|hsa04810,Regulation of actin cytoskeleton			http://www.uniprot.org/uniprot/O43707	False
FLNA	2.1782	1.12314	Q5HY54	FLNA		GO:0005856,cytoskeleton|GO:0005737,cytoplasm|GO:0015629,actin cytoskeleton|GO:0043232,intracellular non-membrane-bounded organelle|GO:0044464,cell part|GO:0016020,membrane|GO:0071944,cell periphery|GO:0005623,cell|GO:0005622,intracellular|GO:0043229,intracellular organelle|GO:0043228,non-membrane-bounded organelle|GO:0005886,plasma membrane|GO:0044424,intracellular part|GO:0043226,organelle	GO:0008092,cytoskeletal protein binding|GO:0051015,actin filament binding|GO:0003779,actin binding|GO:0044877,macromolecular complex binding|GO:0005488,binding|GO:0005515,protein binding|GO:0032403,protein complex binding				http://www.uniprot.org/uniprot/Q5HY54	False
HBG2	2.15086	1.10491	P69892	HBG2	GO:0051234,establishment of localization|GO:0044699,single-organism process|GO:0032501,multicellular organismal process|GO:0007599,hemostasis|GO:0044707,single-multicellular organism process|GO:0050878,regulation of body fluid levels|GO:0006950,response to stress|GO:0050896,response to stimulus|GO:0007596,blood coagulation|GO:0009611,response to wounding|GO:0042060,wound healing|GO:0015669,gas tr…	GO:0043234,protein complex|GO:0005737,cytoplasm|GO:0032991,macromolecular complex|GO:0005615,extracellular space|GO:0005829,cytosol|GO:0044464,cell part|GO:0005623,cell|GO:0005833,hemoglobin complex|GO:0044444,cytoplasmic part|GO:0044445,cytosolic part|GO:0072562,blood microparticle|GO:0044424,intracellular part|GO:0005622,intracellular|GO:0044421,extracellular region part|GO:0005576,extracellula…	GO:0043169,cation binding|GO:0005344,oxygen transporter activity|GO:0022892,substrate-specific transporter activity|GO:0046914,transition metal ion binding|GO:0020037,heme binding|GO:0046906,tetrapyrrole binding|GO:0005215,transporter activity|GO:0043167,ion binding|GO:0019825,oxygen binding|GO:0005488,binding|GO:0097159,organic cyclic compound binding|GO:0005506,iron ion binding|GO:0046872,metal…				http://www.uniprot.org/uniprot/P69892	False
PDIA3	2.14457	1.10069	P30101	PDIA3	GO:2001235,positive regulation of apoptotic signaling pathway|GO:2001236,regulation of extrinsic apoptotic signaling pathway|GO:0008104,protein localization|GO:2001233,regulation of apoptotic signaling pathway|GO:0051049,regulation of transport|GO:0048584,positive regulation of response to stimulus|GO:2001238,positive regulation of extrinsic apoptotic signaling pathway|GO:0051169,nuclear transpor…	GO:0005783,endoplasmic reticulum|GO:0048770,pigment granule|GO:0031974,membrane-enclosed lumen|GO:0043229,intracellular organelle|GO:0005924,cell-substrate adherens junction|GO:0005925,focal adhesion|GO:0043227,membrane-bounded organelle|GO:0043226,organelle|GO:0030054,cell junction|GO:0030055,cell-substrate junction|GO:0005737,cytoplasm|GO:0012505,endomembrane system|GO:0070062,extracellular exo…	GO:0004175,endopeptidase activity|GO:0004197,cysteine-type endopeptidase activity|GO:0042578,phosphoric ester hydrolase activity|GO:0005488,binding|GO:0003676,nucleic acid binding|GO:0008233,peptidase activity|GO:0016864,intramolecular oxidoreductase activity, transposing S-S bonds|GO:0008234,cysteine-type peptidase activity|GO:0016860,intramolecular oxidoreductase activity|GO:0008081,phosphoric …	hsa04612,Antigen processing and presentation|hsa04141,Protein processing in endoplasmic reticulum|hsa05168,Herpes simplex infection|hsa05169,Epstein-Barr virus infection|hsa05170,Human immunodeficiency virus 1 infection|hsa05163,Human cytomegalovirus infection			http://www.uniprot.org/uniprot/P30101	False
TBCB	2.12659	1.08854	K7EP07	TBCB		GO:0005737,cytoplasm|GO:0044446,intracellular organelle part|GO:0043231,intracellular membrane-bounded organelle|GO:0031981,nuclear lumen|GO:0043233,organelle lumen|GO:0005634,nucleus|GO:0044464,cell part|GO:0031974,membrane-enclosed lumen|GO:0005622,intracellular|GO:0005654,nucleoplasm|GO:0070013,intracellular organelle lumen|GO:0043229,intracellular organelle|GO:0044428,nuclear part|GO:0005623,…					http://www.uniprot.org/uniprot/K7EP07	False
METTL7A	2.10681	1.07506	F8VQX6	METTL7A	GO:0032259,methylation|GO:0008152,metabolic process	GO:0016020,membrane|GO:0043232,intracellular non-membrane-bounded organelle|GO:0016021,integral component of membrane|GO:0005811,lipid particle|GO:0044464,cell part|GO:0005623,cell|GO:0005622,intracellular|GO:0043229,intracellular organelle|GO:0043228,non-membrane-bounded organelle|GO:0044424,intracellular part|GO:0044425,membrane part|GO:0043226,organelle|GO:0031224,intrinsic component of membra…	GO:0008757,S-adenosylmethionine-dependent methyltransferase activity|GO:0003824,catalytic activity|GO:0016740,transferase activity|GO:0016741,transferase activity, transferring one-carbon groups|GO:0008168,methyltransferase activity				http://www.uniprot.org/uniprot/F8VQX6	False
LAP3	2.09859	1.06942	P28838	LAP3	GO:0044238,primary metabolic process|GO:0019538,protein metabolic process|GO:0043170,macromolecule metabolic process|GO:0071704,organic substance metabolic process|GO:0008152,metabolic process|GO:0006508,proteolysis|GO:1901564,organonitrogen compound metabolic process|GO:0006807,nitrogen compound metabolic process	GO:0031974,membrane-enclosed lumen|GO:0043229,intracellular organelle|GO:0005924,cell-substrate adherens junction|GO:0005925,focal adhesion|GO:0043227,membrane-bounded organelle|GO:0043226,organelle|GO:0030054,cell junction|GO:0030055,cell-substrate junction|GO:0005737,cytoplasm|GO:0031984,organelle subcompartment|GO:0070062,extracellular exosome|GO:0031981,nuclear lumen|GO:0005634,nucleus|GO:000…	GO:0004177,aminopeptidase activity|GO:0046914,transition metal ion binding|GO:0016787,hydrolase activity|GO:0003824,catalytic activity|GO:0043169,cation binding|GO:0030145,manganese ion binding|GO:0043167,ion binding|GO:0008238,exopeptidase activity|GO:0070011,peptidase activity, acting on L-amino acid peptides|GO:0005488,binding|GO:0008233,peptidase activity|GO:0046872,metal ion binding|GO:00082…	hsa01100,Metabolic pathways|hsa00480,Glutathione metabolism|hsa00330,Arginine and proline metabolism			http://www.uniprot.org/uniprot/P28838	False
QDPR	2.09806	1.06905	P09417	QDPR	GO:0043436,oxoacid metabolic process|GO:0044281,small molecule metabolic process|GO:0044282,small molecule catabolic process|GO:1901362,organic cyclic compound biosynthetic process|GO:1901360,organic cyclic compound metabolic process|GO:1901361,organic cyclic compound catabolic process|GO:0044712,single-organism catabolic process|GO:0044710,single-organism metabolic process|GO:0048513,animal orga…	GO:0043229,intracellular organelle|GO:0043227,membrane-bounded organelle|GO:0043226,organelle|GO:0005737,cytoplasm|GO:1903561,extracellular vesicle|GO:0031982,vesicle|GO:0005739,mitochondrion|GO:0031988,membrane-bounded vesicle|GO:0097458,neuron part|GO:0043005,neuron projection|GO:0042995,cell projection|GO:0070062,extracellular exosome|GO:0043230,extracellular organelle|GO:0043231,intracellular…	GO:0051287,NAD binding|GO:0005488,binding|GO:0043167,ion binding|GO:1901363,heterocyclic compound binding|GO:1901265,nucleoside phosphate binding|GO:0016491,oxidoreductase activity|GO:0043168,anion binding|GO:0050662,coenzyme binding|GO:0050661,NADP binding|GO:0016646,oxidoreductase activity, acting on the CH-NH group of donors, NAD or NADP as acceptor|GO:0016645,oxidoreductase activity, acting o…	hsa01100,Metabolic pathways|hsa00790,Folate biosynthesis			http://www.uniprot.org/uniprot/P09417	False
RAB1A	2.00142	1.00103	P62820	RAB1A	GO:0008104,protein localization|GO:0080090,regulation of primary metabolic process|GO:0019222,regulation of metabolic process|GO:0034446,substrate adhesion-dependent cell spreading|GO:0048468,cell development|GO:0006900,membrane budding|GO:0061024,membrane organization|GO:0007165,signal transduction|GO:0051656,establishment of organelle localization|GO:0061028,establishment of endothelial barrier…	GO:0005783,endoplasmic reticulum|GO:0044421,extracellular region part|GO:0048770,pigment granule|GO:0005789,endoplasmic reticulum membrane|GO:0042175,nuclear outer membrane-endoplasmic reticulum membrane network|GO:0043229,intracellular organelle|GO:0005622,intracellular|GO:0043227,membrane-bounded organelle|GO:0043226,organelle|GO:0005737,cytoplasm|GO:0070062,extracellular exosome|GO:0016023,cyt…	GO:0035639,purine ribonucleoside triphosphate binding|GO:0005488,binding|GO:0043167,ion binding|GO:1901363,heterocyclic compound binding|GO:1901265,nucleoside phosphate binding|GO:0001882,nucleoside binding|GO:0043168,anion binding|GO:0016462,pyrophosphatase activity|GO:0000166,nucleotide binding|GO:0032561,guanyl ribonucleotide binding|GO:0001883,purine nucleoside binding|GO:0032549,ribonucleosi…	hsa04140,Regulation of autophagy|hsa05130,Pathogenic Escherichia coli infection|hsa05134,Legionellosis			http://www.uniprot.org/uniprot/P62820	False
GBE1	1.96228	0.972528	Q04446	GBE1	GO:0044249,cellular biosynthetic process|GO:0009250,glucan biosynthetic process|GO:0044281,small molecule metabolic process|GO:0034645,cellular macromolecule biosynthetic process|GO:0006091,generation of precursor metabolites and energy|GO:0033692,cellular polysaccharide biosynthetic process|GO:0044699,single-organism process|GO:1901576,organic substance biosynthetic process|GO:0044710,single-org…	GO:0005737,cytoplasm|GO:0005622,intracellular|GO:0043230,extracellular organelle|GO:0031982,vesicle|GO:0044421,extracellular region part|GO:0043227,membrane-bounded organelle|GO:0005829,cytosol|GO:0044464,cell part|GO:0005623,cell|GO:0031988,membrane-bounded vesicle|GO:0044444,cytoplasmic part|GO:0005576,extracellular region|GO:0044424,intracellular part|GO:1903561,extracellular vesicle|GO:006501…	GO:0016787,hydrolase activity|GO:0043169,cation binding|GO:0003844,1,4-alpha-glucan branching enzyme activity|GO:0016798,hydrolase activity, acting on glycosyl bonds|GO:0043167,ion binding|GO:0003824,catalytic activity|GO:0016740,transferase activity|GO:0005488,binding|GO:0016757,transferase activity, transferring glycosyl groups|GO:0004553,hydrolase activity, hydrolyzing O-glycosyl compounds|GO:…	hsa01100,Metabolic pathways|hsa00500,Starch and sucrose metabolism			http://www.uniprot.org/uniprot/Q04446	False
PSMD13	1.93374	0.951397	Q9UNM6	PSMD13	GO:0080090,regulation of primary metabolic process|GO:0019222,regulation of metabolic process|GO:0048585,negative regulation of response to stimulus|GO:0048584,positive regulation of response to stimulus|GO:0048583,regulation of response to stimulus|GO:0031349,positive regulation of defense response|GO:0030111,regulation of Wnt signaling pathway|GO:0000280,nuclear division|GO:0007165,signal trans…	GO:0022624,proteasome accessory complex|GO:0031974,membrane-enclosed lumen|GO:0043229,intracellular organelle|GO:0043227,membrane-bounded organelle|GO:0043226,organelle|GO:0005737,cytoplasm|GO:0005838,proteasome regulatory particle|GO:0070062,extracellular exosome|GO:0031981,nuclear lumen|GO:0005634,nucleus|GO:0016020,membrane|GO:0031988,membrane-bounded vesicle|GO:0005654,nucleoplasm|GO:0032991,…	GO:0005198,structural molecule activity	hsa03050,Proteasome|hsa05169,Epstein-Barr virus infection			http://www.uniprot.org/uniprot/Q9UNM6	False
CD59	1.92204	0.94264	P13987	CD59	GO:0007599,hemostasis|GO:0080090,regulation of primary metabolic process|GO:0019222,regulation of metabolic process|GO:0034110,regulation of homotypic cell-cell adhesion|GO:0048585,negative regulation of response to stimulus|GO:0048584,positive regulation of response to stimulus|GO:0048583,regulation of response to stimulus|GO:0007165,signal transduction|GO:0007166,cell surface receptor signaling…	GO:0009897,external side of plasma membrane|GO:0046658,anchored component of plasma membrane|GO:0071944,cell periphery|GO:0098552,side of membrane|GO:0005924,cell-substrate adherens junction|GO:0005925,focal adhesion|GO:0043227,membrane-bounded organelle|GO:0043226,organelle|GO:0030054,cell junction|GO:0030055,cell-substrate junction|GO:0031982,vesicle|GO:0043209,myelin sheath|GO:0031226,intrinsi…	GO:0001848,complement binding|GO:0005488,binding|GO:0005515,protein binding	hsa04610,Complement and coagulation cascades|hsa04640,Hematopoietic cell lineage			http://www.uniprot.org/uniprot/P13987	False
KPNA6	1.86376	0.898214	O60684	KPNA6	GO:0051169,nuclear transport|GO:0008104,protein localization|GO:0080090,regulation of primary metabolic process|GO:0019222,regulation of metabolic process|GO:1901362,organic cyclic compound biosynthetic process|GO:1901360,organic cyclic compound metabolic process|GO:0010604,positive regulation of macromolecule metabolic process|GO:0070727,cellular macromolecule localization|GO:0048518,positive re…	GO:0005737,cytoplasm|GO:0043231,intracellular membrane-bounded organelle|GO:0005634,nucleus|GO:0016020,membrane|GO:0044464,cell part|GO:0005623,cell|GO:0005622,intracellular|GO:0043229,intracellular organelle|GO:0044424,intracellular part|GO:0043227,membrane-bounded organelle|GO:0043226,organelle|GO:0005635,nuclear envelope|GO:0031974,membrane-enclosed lumen|GO:0031975,envelope|GO:0031981,nuclear…	GO:0008565,protein transporter activity|GO:0022892,substrate-specific transporter activity|GO:0005215,transporter activity|GO:0005488,binding|GO:0005515,protein binding|GO:0042277,peptide binding|GO:0005048,signal sequence binding|GO:0008139,nuclear localization sequence binding|GO:0033218,amide binding|GO:0015197,peptide transporter activity|GO:0061608,nuclear import signal receptor activity|GO:…	hsa05164,Influenza A			http://www.uniprot.org/uniprot/O60684	False
CUL2	1.8313	0.872872	Q13617	CUL2	GO:0009628,response to abiotic stimulus|GO:0080090,regulation of primary metabolic process|GO:0019222,regulation of metabolic process|GO:0000082,G1/S transition of mitotic cell cycle|GO:0007165,signal transduction|GO:0010556,regulation of macromolecule biosynthetic process|GO:1901362,organic cyclic compound biosynthetic process|GO:1901360,organic cyclic compound metabolic process|GO:0051716,cellu…	GO:0031974,membrane-enclosed lumen|GO:0043229,intracellular organelle|GO:0043227,membrane-bounded organelle|GO:0043226,organelle|GO:0005737,cytoplasm|GO:0031981,nuclear lumen|GO:0005634,nucleus|GO:0005654,nucleoplasm|GO:1902494,catalytic complex|GO:1990234,transferase complex|GO:0031461,cullin-RING ubiquitin ligase complex|GO:0031462,Cul2-RING ubiquitin ligase complex|GO:0043234,protein complex|G…	GO:0019787,ubiquitin-like protein transferase activity|GO:0031625,ubiquitin protein ligase binding|GO:0044389,ubiquitin-like protein ligase binding|GO:0061630,ubiquitin protein ligase activity|GO:0019899,enzyme binding|GO:0003824,catalytic activity|GO:0016740,transferase activity|GO:0005488,binding|GO:0005515,protein binding|GO:0004842,ubiquitin-protein transferase activity|GO:0061659,ubiquitin-l…	hsa04066,HIF-1 signaling pathway|hsa05211,Renal cell carcinoma|hsa05200,Pathways in cancer|hsa04120,Ubiquitin mediated proteolysis			http://www.uniprot.org/uniprot/Q13617	False
ATP6V1H	1.78418	0.835262	Q9UI12	ATP6V1H	GO:0008104,protein localization|GO:0050688,regulation of defense response to virus|GO:0019222,regulation of metabolic process|GO:0048583,regulation of response to stimulus|GO:0055072,iron ion homeostasis|GO:0006826,iron ion transport|GO:0007165,signal transduction|GO:0007166,cell surface receptor signaling pathway|GO:0055076,transition metal ion homeostasis|GO:0098771,inorganic ion homeostasis|GO…	GO:0000323,lytic vacuole|GO:0043229,intracellular organelle|GO:0000221,vacuolar proton-transporting V-type ATPase, V1 domain|GO:0031988,membrane-bounded vesicle|GO:0043227,membrane-bounded organelle|GO:0043226,organelle|GO:0005737,cytoplasm|GO:0044446,intracellular organelle part|GO:0031982,vesicle|GO:0098796,membrane protein complex|GO:0005773,vacuole|GO:0098805,whole membrane|GO:0016020,membran…	GO:0036442,hydrogen-exporting ATPase activity|GO:0005488,binding|GO:0016887,ATPase activity|GO:0098772,molecular function regulator|GO:0042625,ATPase coupled ion transmembrane transporter activity|GO:0042626,ATPase activity, coupled to transmembrane movement of substances|GO:0016820,hydrolase activity, acting on acid anhydrides, catalyzing transmembrane movement of substances|GO:0042623,ATPase ac…	hsa05120,Epithelial cell signaling in Helicobacter pylori infection|hsa00190,Oxidative phosphorylation|hsa05323,Rheumatoid arthritis|hsa01100,Metabolic pathways|hsa04721,Synaptic vesicle cycle|hsa04142,Lysosome|hsa04145,Phagosome|hsa05165,Human papillomavirus infection|hsa05152,Tuberculosis|hsa05110,Vibrio cholerae infection|hsa04150,mTOR signaling pathway			http://www.uniprot.org/uniprot/Q9UI12	False
DNM2	1.76201	0.817219	P50570	DNM2	GO:0006909,phagocytosis|GO:0051049,regulation of transport|GO:0006907,pinocytosis|GO:0044281,small molecule metabolic process|GO:0051656,establishment of organelle localization|GO:0051650,establishment of vesicle localization|GO:0051716,cellular response to stimulus|GO:0048589,developmental growth|GO:1990138,neuron projection extension|GO:0048468,cell development|GO:2000649,regulation of sodium i…	GO:0030427,site of polarized growth|GO:0030426,growth cone|GO:0030054,cell junction|GO:0030055,cell-substrate junction|GO:0097060,synaptic membrane|GO:0031984,organelle subcompartment|GO:0031982,vesicle|GO:0016023,cytoplasmic, membrane-bounded vesicle|GO:0016020,membrane|GO:0031988,membrane-bounded vesicle|GO:0005794,Golgi apparatus|GO:0098588,bounding membrane of organelle|GO:0098589,membrane re…	GO:0035639,purine ribonucleoside triphosphate binding|GO:0017124,SH3 domain binding|GO:0019899,enzyme binding|GO:0044877,macromolecular complex binding|GO:0005488,binding|GO:0001664,G-protein coupled receptor binding|GO:0043167,ion binding|GO:1901363,heterocyclic compound binding|GO:0001883,purine nucleoside binding|GO:0001882,nucleoside binding|GO:0043168,anion binding|GO:0019900,kinase binding|…	hsa04961,Endocrine and other factor-regulated calcium reabsorption|hsa05100,Bacterial invasion of epithelial cells|hsa04721,Synaptic vesicle cycle|hsa04072,Phospholipase D signaling pathway|hsa04144,Endocytosis|hsa04666,Fc gamma R-mediated phagocytosis			http://www.uniprot.org/uniprot/P50570	False
HBE1	1.75126	0.808396	P02100	HBE1	GO:0007599,hemostasis|GO:0080090,regulation of primary metabolic process|GO:0019222,regulation of metabolic process|GO:0007596,blood coagulation|GO:1901362,organic cyclic compound biosynthetic process|GO:1901360,organic cyclic compound metabolic process|GO:0010605,negative regulation of macromolecule metabolic process|GO:0009611,response to wounding|GO:0048519,negative regulation of biological pr…	GO:0043234,protein complex|GO:0005737,cytoplasm|GO:0032991,macromolecular complex|GO:0005615,extracellular space|GO:0005829,cytosol|GO:0044464,cell part|GO:0005623,cell|GO:0005833,hemoglobin complex|GO:0044444,cytoplasmic part|GO:0044445,cytosolic part|GO:0072562,blood microparticle|GO:0044424,intracellular part|GO:0005622,intracellular|GO:0044421,extracellular region part|GO:0005576,extracellula…	GO:0043169,cation binding|GO:0005344,oxygen transporter activity|GO:0022892,substrate-specific transporter activity|GO:0046914,transition metal ion binding|GO:0020037,heme binding|GO:0046906,tetrapyrrole binding|GO:0030492,hemoglobin binding|GO:0005215,transporter activity|GO:0031721,hemoglobin alpha binding|GO:0043167,ion binding|GO:0019825,oxygen binding|GO:0005488,binding|GO:0005515,protein bi…				http://www.uniprot.org/uniprot/P02100	False
ARHGAP1	1.7406	0.799584	Q07960	ARHGAP1	GO:0009893,positive regulation of metabolic process|GO:0019222,regulation of metabolic process|GO:0048584,positive regulation of response to stimulus|GO:0048583,regulation of response to stimulus|GO:0023056,positive regulation of signaling|GO:0023052,signaling|GO:0007165,signal transduction|GO:0023051,regulation of signaling|GO:0035556,intracellular signal transduction|GO:0010646,regulation of ce…	GO:0071944,cell periphery|GO:0043227,membrane-bounded organelle|GO:0043226,organelle|GO:0005737,cytoplasm|GO:0001726,ruffle|GO:1903561,extracellular vesicle|GO:0031982,vesicle|GO:0016020,membrane|GO:0031988,membrane-bounded vesicle|GO:0031252,cell leading edge|GO:0005886,plasma membrane|GO:0042995,cell projection|GO:0070062,extracellular exosome|GO:0043230,extracellular organelle|GO:0005829,cytos…	GO:0005070,SH3/SH2 adaptor activity|GO:0030674,protein binding, bridging|GO:0035591,signaling adaptor activity|GO:0030234,enzyme regulator activity|GO:0005096,GTPase activator activity|GO:0017124,SH3 domain binding|GO:0030695,GTPase regulator activity|GO:0008047,enzyme activator activity|GO:0005515,protein binding|GO:0005488,binding|GO:0098772,molecular function regulator|GO:0060589,nucleoside-tr…				http://www.uniprot.org/uniprot/Q07960	False
PTPN11	1.73488	0.794833	Q06124	PTPN11	GO:0033157,regulation of intracellular protein transport|GO:0051169,nuclear transport|GO:0051168,nuclear export|GO:0007599,hemostasis|GO:0030252,growth hormone secretion|GO:0051046,regulation of secretion|GO:0051047,positive regulation of secretion|GO:0051048,negative regulation of secretion|GO:0051049,regulation of transport|GO:0007596,blood coagulation|GO:0030220,platelet formation|GO:0001501,s…	GO:0043234,protein complex|GO:0005737,cytoplasm|GO:0005829,cytosol|GO:0032991,macromolecular complex|GO:0043231,intracellular membrane-bounded organelle|GO:0005634,nucleus|GO:0044464,cell part|GO:0044444,cytoplasmic part|GO:0005739,mitochondrion|GO:0005622,intracellular|GO:0043229,intracellular organelle|GO:0005623,cell|GO:0044424,intracellular part|GO:0043227,membrane-bounded organelle|GO:004322…	GO:0016791,phosphatase activity|GO:0019899,enzyme binding|GO:0042578,phosphoric ester hydrolase activity|GO:0044877,macromolecular complex binding|GO:0005488,binding|GO:0001664,G-protein coupled receptor binding|GO:0005070,SH3/SH2 adaptor activity|GO:0043560,insulin receptor substrate binding|GO:0030971,receptor tyrosine kinase binding|GO:0032403,protein complex binding|GO:1990782,protein tyrosin…	hsa05120,Epithelial cell signaling in Helicobacter pylori infection|hsa05220,Chronic myeloid leukemia|hsa05130,Pathogenic Escherichia coli infection|hsa05205,Proteoglycans in cancer|hsa04650,Natural killer cell mediated cytotoxicity|hsa05211,Renal cell carcinoma|hsa04072,Phospholipase D signaling pathway|hsa04630,Jak-STAT signaling pathway|hsa04670,Leukocyte transendothelial migration|hsa05235,un…			http://www.uniprot.org/uniprot/Q06124	False
GMPR	1.72432	0.786026	P36959	GMPR	GO:0009628,response to abiotic stimulus|GO:0044249,cellular biosynthetic process|GO:0034641,cellular nitrogen compound metabolic process|GO:0006807,nitrogen compound metabolic process|GO:0044281,small molecule metabolic process|GO:0072521,purine-containing compound metabolic process|GO:0072522,purine-containing compound biosynthetic process|GO:1901362,organic cyclic compound biosynthetic process|…	GO:0043234,protein complex|GO:0005737,cytoplasm|GO:0032991,macromolecular complex|GO:1902494,catalytic complex|GO:0005829,cytosol|GO:0044464,cell part|GO:0005623,cell|GO:1990204,oxidoreductase complex|GO:0044444,cytoplasmic part|GO:1902560,GMP reductase complex|GO:0044424,intracellular part|GO:0005622,intracellular	GO:0005488,binding|GO:0043169,cation binding|GO:0003920,GMP reductase activity|GO:0043167,ion binding|GO:0003824,catalytic activity|GO:0016657,oxidoreductase activity, acting on NAD(P)H, nitrogenous group as acceptor|GO:0016651,oxidoreductase activity, acting on NAD(P)H|GO:0046872,metal ion binding|GO:0016491,oxidoreductase activity	hsa01100,Metabolic pathways|hsa00230,Purine metabolism			http://www.uniprot.org/uniprot/P36959	False
SGTA	1.67345	0.742825	O43765	SGTA	GO:0009896,positive regulation of catabolic process|GO:0009894,regulation of catabolic process|GO:0051716,cellular response to stimulus|GO:0032436,positive regulation of proteasomal ubiquitin-dependent protein catabolic process|GO:0009893,positive regulation of metabolic process|GO:0032434,regulation of proteasomal ubiquitin-dependent protein catabolic process|GO:0010498,proteasomal protein catab…	GO:0005737,cytoplasm|GO:0005829,cytosol|GO:0016020,membrane|GO:0044464,cell part|GO:0005623,cell|GO:0005622,intracellular|GO:0044444,cytoplasmic part|GO:0044424,intracellular part|GO:0043231,intracellular membrane-bounded organelle|GO:0005634,nucleus|GO:0043229,intracellular organelle|GO:0043227,membrane-bounded organelle|GO:0043226,organelle|GO:0008021,synaptic vesicle|GO:0019898,extrinsic compo…	GO:0070628,proteasome binding|GO:1904288,BAT3 complex binding|GO:0044877,macromolecular complex binding|GO:0005488,binding|GO:0005515,protein binding|GO:0032403,protein complex binding|GO:0043621,protein self-association|GO:0042802,identical protein binding|GO:0005198,structural molecule activity|GO:0032947,protein complex scaffold activity				http://www.uniprot.org/uniprot/O43765	False
HNRNPK	1.66812	0.738222	P61978	HNRNPK	GO:0080090,regulation of primary metabolic process|GO:0019222,regulation of metabolic process|GO:0051049,regulation of transport|GO:0007165,signal transduction|GO:0048260,positive regulation of receptor-mediated endocytosis|GO:1901362,organic cyclic compound biosynthetic process|GO:0071840,cellular component organization or biogenesis|GO:0051716,cellular response to stimulus|GO:0010604,positive r…	GO:0042995,cell projection|GO:0015629,actin cytoskeleton|GO:0005924,cell-substrate adherens junction|GO:0031974,membrane-enclosed lumen|GO:0043229,intracellular organelle|GO:0043228,non-membrane-bounded organelle|GO:0000785,chromatin|GO:0000228,nuclear chromosome|GO:0005925,focal adhesion|GO:0043227,membrane-bounded organelle|GO:0043226,organelle|GO:0030054,cell junction|GO:0030055,cell-substrate…	GO:0001012,RNA polymerase II regulatory region DNA binding|GO:0001159,core promoter proximal region DNA binding|GO:0001077,transcriptional activator activity, RNA polymerase II core promoter proximal region sequence-specific binding|GO:0005488,binding|GO:0003676,nucleic acid binding|GO:0003677,DNA binding|GO:1901363,heterocyclic compound binding|GO:0043565,sequence-specific DNA binding|GO:0043566…	hsa05206,MicroRNAs in cancer|hsa03040,Spliceosome|hsa05203,Viral carcinogenesis			http://www.uniprot.org/uniprot/P61978	False
RNPEP	1.66621	0.736573	Q9H4A4	RNPEP	GO:0006633,fatty acid biosynthetic process|GO:0006631,fatty acid metabolic process|GO:0006636,unsaturated fatty acid biosynthetic process|GO:0044237,cellular metabolic process|GO:0019752,carboxylic acid metabolic process|GO:0044248,cellular catabolic process|GO:0044249,cellular biosynthetic process|GO:0034641,cellular nitrogen compound metabolic process|GO:0003013,circulatory system process|GO:00…	GO:0043229,intracellular organelle|GO:0071944,cell periphery|GO:0043227,membrane-bounded organelle|GO:0043226,organelle|GO:0005737,cytoplasm|GO:0070062,extracellular exosome|GO:0016023,cytoplasmic, membrane-bounded vesicle|GO:0031410,cytoplasmic vesicle|GO:0016020,membrane|GO:0031988,membrane-bounded vesicle|GO:0005615,extracellular space|GO:0030141,secretory granule|GO:0012505,endomembrane syste…	GO:0004177,aminopeptidase activity|GO:0042277,peptide binding|GO:0046914,transition metal ion binding|GO:0016787,hydrolase activity|GO:0016801,hydrolase activity, acting on ether bonds|GO:0033218,amide binding|GO:0016803,ether hydrolase activity|GO:0043169,cation binding|GO:0003824,catalytic activity|GO:0043167,ion binding|GO:0004301,epoxide hydrolase activity|GO:0008238,exopeptidase activity|GO:…			D00087,Ubenimex (JP16/INN); Bestatin (TN)	http://www.uniprot.org/uniprot/Q9H4A4	False
TUBA1B	1.65698	0.72856	P68363	TUBA1B	GO:0022607,cellular component assembly|GO:0006457,protein folding|GO:0070271,protein complex biogenesis|GO:0043933,macromolecular complex subunit organization|GO:0006458,'de novo' protein folding|GO:0000226,microtubule cytoskeleton organization|GO:0070887,cellular response to chemical stimulus|GO:0034622,cellular macromolecular complex assembly|GO:0044699,single-organism process|GO:0044267,cellul…	GO:0043229,intracellular organelle|GO:0043228,non-membrane-bounded organelle|GO:0005874,microtubule|GO:0043226,organelle|GO:0005856,cytoskeleton|GO:0031982,vesicle|GO:0043209,myelin sheath|GO:0043227,membrane-bounded organelle|GO:0031988,membrane-bounded vesicle|GO:0044430,cytoskeletal part|GO:0005737,cytoplasm|GO:0015630,microtubule cytoskeleton|GO:0005881,cytoplasmic microtubule|GO:0032991,macr…	GO:0005200,structural constituent of cytoskeleton|GO:0044389,ubiquitin-like protein ligase binding|GO:0035639,purine ribonucleoside triphosphate binding|GO:0019899,enzyme binding|GO:0005488,binding|GO:0003676,nucleic acid binding|GO:0000166,nucleotide binding|GO:1901363,heterocyclic compound binding|GO:0001883,purine nucleoside binding|GO:0001882,nucleoside binding|GO:0043168,anion binding|GO:001…	hsa04530,Tight junction|hsa04210,Apoptosis|hsa05130,Pathogenic Escherichia coli infection|hsa04145,Phagosome|hsa04540,Gap junction			http://www.uniprot.org/uniprot/P68363	False
DBNL	1.64924	0.721803	F2Z3E3	DBNL	GO:0032502,developmental process|GO:0044707,single-multicellular organism process|GO:0050808,synapse organization|GO:0030030,cell projection organization|GO:0030031,cell projection assembly|GO:0030154,cell differentiation|GO:0048468,cell development|GO:0022607,cellular component assembly|GO:0031175,neuron projection development|GO:0009653,anatomical structure morphogenesis|GO:0007275,multicellula…		GO:0008092,cytoskeletal protein binding|GO:0051015,actin filament binding|GO:0003779,actin binding|GO:0044877,macromolecular complex binding|GO:0005488,binding|GO:0005515,protein binding|GO:0032403,protein complex binding				http://www.uniprot.org/uniprot/F2Z3E3	False
SH3BGRL3	1.63669	0.710784	Q9H299	SH3BGRL3	GO:0044707,single-multicellular organism process|GO:0009893,positive regulation of metabolic process|GO:0019222,regulation of metabolic process|GO:0033043,regulation of organelle organization|GO:0043933,macromolecular complex subunit organization|GO:1901879,regulation of protein depolymerization|GO:0030036,actin cytoskeleton organization|GO:0051128,regulation of cellular component organization|GO…	GO:0043229,intracellular organelle|GO:0043227,membrane-bounded organelle|GO:0043226,organelle|GO:0005737,cytoplasm|GO:1903561,extracellular vesicle|GO:0031982,vesicle|GO:0005634,nucleus|GO:0031988,membrane-bounded vesicle|GO:0030027,lamellipodium|GO:0031252,cell leading edge|GO:0042995,cell projection|GO:0070062,extracellular exosome|GO:0043230,extracellular organelle|GO:0043231,intracellular mem…	GO:0016491,oxidoreductase activity|GO:0009055,electron carrier activity|GO:0030215,semaphorin receptor binding|GO:0005515,protein binding|GO:0003824,catalytic activity|GO:0015035,protein disulfide oxidoreductase activity|GO:0030234,enzyme regulator activity|GO:0005096,GTPase activator activity|GO:0030695,GTPase regulator activity|GO:0008047,enzyme activator activity|GO:0016667,oxidoreductase acti…				http://www.uniprot.org/uniprot/Q9H299	False
VPS25	1.63139	0.706098	Q9BRG1	VPS25	GO:0008104,protein localization|GO:0080090,regulation of primary metabolic process|GO:0019222,regulation of metabolic process|GO:0061024,membrane organization|GO:1901362,organic cyclic compound biosynthetic process|GO:1901360,organic cyclic compound metabolic process|GO:0070727,cellular macromolecule localization|GO:0044419,interspecies interaction between organisms|GO:0019058,viral life cycle|GO…	GO:0098796,membrane protein complex|GO:0044421,extracellular region part|GO:0031974,membrane-enclosed lumen|GO:0043229,intracellular organelle|GO:0043228,non-membrane-bounded organelle|GO:0043227,membrane-bounded organelle|GO:0043226,organelle|GO:0010008,endosome membrane|GO:0005737,cytoplasm|GO:0070062,extracellular exosome|GO:0031981,nuclear lumen|GO:0005730,nucleolus|GO:0005634,nucleus|GO:0016…	GO:0047485,protein N-terminus binding|GO:0005198,structural molecule activity|GO:0005488,binding|GO:0005515,protein binding|GO:0046983,protein dimerization activity|GO:0042802,identical protein binding|GO:0042803,protein homodimerization activity	hsa04144,Endocytosis			http://www.uniprot.org/uniprot/Q9BRG1	False
WBP2	1.62446	0.699957	Q969T9	WBP2	GO:0008104,protein localization|GO:0035065,regulation of histone acetylation|GO:0035066,positive regulation of histone acetylation|GO:0006473,protein acetylation|GO:0006475,internal protein amino acid acetylation|GO:0031056,regulation of histone modification|GO:0031058,positive regulation of histone modification|GO:1901362,organic cyclic compound biosynthetic process|GO:0071840,cellular component…	GO:0031974,membrane-enclosed lumen|GO:0043229,intracellular organelle|GO:0043228,non-membrane-bounded organelle|GO:0000785,chromatin|GO:0000228,nuclear chromosome|GO:0043227,membrane-bounded organelle|GO:0043226,organelle|GO:0031981,nuclear lumen|GO:0005634,nucleus|GO:0044454,nuclear chromosome part|GO:0005694,chromosome|GO:0000790,nuclear chromatin|GO:0032991,macromolecular complex|GO:0043231,in…	GO:0001012,RNA polymerase II regulatory region DNA binding|GO:0031490,chromatin DNA binding|GO:0001076,transcription factor activity, RNA polymerase II transcription factor binding|GO:0044877,macromolecular complex binding|GO:0005488,binding|GO:0003676,nucleic acid binding|GO:0003677,DNA binding|GO:1901363,heterocyclic compound binding|GO:0043565,sequence-specific DNA binding|GO:0043566,structure…				http://www.uniprot.org/uniprot/Q969T9	False
GMPPB	1.58365	0.663256	Q9Y5P6	GMPPB	GO:0019673,GDP-mannose metabolic process|GO:0009298,GDP-mannose biosynthetic process|GO:0044723,single-organism carbohydrate metabolic process|GO:0034641,cellular nitrogen compound metabolic process|GO:0009165,nucleotide biosynthetic process|GO:0006807,nitrogen compound metabolic process|GO:0044281,small molecule metabolic process|GO:0034645,cellular macromolecule biosynthetic process|GO:1901576,…	GO:0043231,intracellular membrane-bounded organelle|GO:0005737,cytoplasm|GO:0005622,intracellular|GO:0043230,extracellular organelle|GO:0031982,vesicle|GO:0044421,extracellular region part|GO:0043227,membrane-bounded organelle|GO:0044464,cell part|GO:0044444,cytoplasmic part|GO:0005739,mitochondrion|GO:0031988,membrane-bounded vesicle|GO:0043229,intracellular organelle|GO:0005576,extracellular re…	GO:0035639,purine ribonucleoside triphosphate binding|GO:0005488,binding|GO:0043167,ion binding|GO:1901363,heterocyclic compound binding|GO:1901265,nucleoside phosphate binding|GO:0001882,nucleoside binding|GO:0043168,anion binding|GO:0000166,nucleotide binding|GO:0032561,guanyl ribonucleotide binding|GO:0016740,transferase activity|GO:0001883,purine nucleoside binding|GO:0032549,ribonucleoside b…	hsa01100,Metabolic pathways|hsa00051,Fructose and mannose metabolism|hsa00520,Amino sugar and nucleotide sugar metabolism			http://www.uniprot.org/uniprot/Q9Y5P6	False
TPM3	1.56877	0.649631	P06753	TPM3	GO:0006928,movement of cell or subcellular component|GO:0003012,muscle system process|GO:0060322,head development|GO:0007275,multicellular organism development|GO:0044699,single-organism process|GO:0007417,central nervous system development|GO:0030029,actin filament-based process|GO:0033275,actin-myosin filament sliding|GO:0048513,animal organ development|GO:0032502,developmental process|GO:00325…	GO:0032432,actin filament bundle|GO:0015629,actin cytoskeleton|GO:0030016,myofibril|GO:0030017,sarcomere|GO:0043229,intracellular organelle|GO:0043228,non-membrane-bounded organelle|GO:0043227,membrane-bounded organelle|GO:0043226,organelle|GO:0042641,actomyosin|GO:0005856,cytoskeleton|GO:0001725,stress fiber|GO:0042995,cell projection|GO:0031982,vesicle|GO:0031988,membrane-bounded vesicle|GO:004…	GO:0003779,actin binding|GO:0005488,binding|GO:0005515,protein binding|GO:0008092,cytoskeletal protein binding|GO:0051015,actin filament binding|GO:0005198,structural molecule activity|GO:0008307,structural constituent of muscle|GO:0044877,macromolecular complex binding|GO:0032403,protein complex binding	hsa04260,Cardiac muscle contraction|hsa05216,Thyroid cancer|hsa05200,Pathways in cancer|hsa05410,Hypertrophic cardiomyopathy (HCM)|hsa05414,Dilated cardiomyopathy|hsa04261,Adrenergic signaling in cardiomyocytes			http://www.uniprot.org/uniprot/P06753	False
USP9X	1.56839	0.649283	Q93008	USP9X	GO:0048675,axon extension|GO:0044238,primary metabolic process|GO:0080090,regulation of primary metabolic process|GO:0019222,regulation of metabolic process|GO:0048588,developmental cell growth|GO:0048468,cell development|GO:0007292,female gamete generation|GO:0030509,BMP signaling pathway|GO:0060322,head development|GO:0007165,signal transduction|GO:0007166,cell surface receptor signaling pathwa…	GO:0005737,cytoplasm|GO:0045177,apical part of cell|GO:0016020,membrane|GO:0044464,cell part|GO:0005829,cytosol|GO:0044463,cell projection part|GO:0030427,site of polarized growth|GO:0030426,growth cone|GO:0005623,cell|GO:0005622,intracellular|GO:0097458,neuron part|GO:0044444,cytoplasmic part|GO:0043005,neuron projection|GO:0044424,intracellular part|GO:0042995,cell projection|GO:0150034,distal …	GO:0016787,hydrolase activity|GO:0004175,endopeptidase activity|GO:0019783,ubiquitin-like protein-specific protease activity|GO:0005515,protein binding|GO:0004197,cysteine-type endopeptidase activity|GO:0008234,cysteine-type peptidase activity|GO:0046332,SMAD binding|GO:0003824,catalytic activity|GO:0036459,thiol-dependent ubiquitinyl hydrolase activity|GO:0070011,peptidase activity, acting on L-…				http://www.uniprot.org/uniprot/Q93008	False
EPB41	1.5633	0.644591	P11171	EPB41	GO:0030036,actin cytoskeleton organization|GO:0003013,circulatory system process|GO:0071840,cellular component organization or biogenesis|GO:0032092,positive regulation of protein binding|GO:0016043,cellular component organization|GO:0065007,biological regulation|GO:0044699,single-organism process|GO:0044093,positive regulation of molecular function|GO:0065009,regulation of molecular function|GO:…	GO:0015629,actin cytoskeleton|GO:0019898,extrinsic component of membrane|GO:0043229,intracellular organelle|GO:0043228,non-membrane-bounded organelle|GO:0005622,intracellular|GO:0043227,membrane-bounded organelle|GO:0043226,organelle|GO:0005856,cytoskeleton|GO:0005634,nucleus|GO:0016020,membrane|GO:0005737,cytoplasm|GO:0044430,cytoskeletal part|GO:0005794,Golgi apparatus|GO:0014731,spectrin-assoc…	GO:0043168,anion binding|GO:0005200,structural constituent of cytoskeleton|GO:0005515,protein binding|GO:0008092,cytoskeletal protein binding|GO:0035091,phosphatidylinositol binding|GO:0005543,phospholipid binding|GO:0005545,1-phosphatidylinositol binding|GO:0005198,structural molecule activity|GO:0003779,actin binding|GO:0005516,calmodulin binding|GO:0008289,lipid binding|GO:0005488,binding|GO:0…	hsa04530,Tight junction			http://www.uniprot.org/uniprot/P11171	False
SEC14L2	1.5621	0.643488	C9JZI9	SEC14L2	GO:0006810,transport|GO:0051179,localization|GO:0051234,establishment of localization	GO:0044464,cell part|GO:0005623,cell|GO:0005622,intracellular|GO:0005737,cytoplasm|GO:0043231,intracellular membrane-bounded organelle|GO:0005829,cytosol|GO:0044444,cytoplasmic part|GO:0043226,organelle|GO:0043229,intracellular organelle|GO:0044424,intracellular part|GO:0043227,membrane-bounded organelle|GO:0005634,nucleus|GO:0044446,intracellular organelle part|GO:0031981,nuclear lumen|GO:004323…	GO:0005215,transporter activity				http://www.uniprot.org/uniprot/C9JZI9	False
AP2S1	1.55585	0.637705	M0R0N4	AP2S1	GO:0033036,macromolecule localization|GO:0034613,cellular protein localization|GO:0016192,vesicle-mediated transport|GO:0046907,intracellular transport|GO:0070727,cellular macromolecule localization|GO:0006886,intracellular protein transport|GO:0006810,transport|GO:0045184,establishment of protein localization|GO:0008104,protein localization|GO:0071702,organic substance transport|GO:0015031,prote…	GO:0030139,endocytic vesicle|GO:0043229,intracellular organelle|GO:0071944,cell periphery|GO:0030117,membrane coat|GO:0005905,clathrin-coated pit|GO:0030131,clathrin adaptor complex|GO:0030119,AP-type membrane coat adaptor complex|GO:0030132,clathrin coat of coated pit|GO:0030135,coated vesicle|GO:0043226,organelle|GO:0030136,clathrin-coated vesicle|GO:0030665,clathrin-coated vesicle membrane|GO:…	GO:0008565,protein transporter activity|GO:0005215,transporter activity|GO:0022892,substrate-specific transporter activity|GO:0015197,peptide transporter activity|GO:0030674,protein binding, bridging|GO:0038024,cargo receptor activity|GO:0030276,clathrin binding|GO:0005488,binding|GO:0005515,protein binding|GO:0098748,endocytic adaptor activity|GO:0035615,clathrin adaptor activity|GO:0060090,bind…	hsa04721,Synaptic vesicle cycle|hsa05016,Huntington's disease|hsa04961,Endocrine and other factor-regulated calcium reabsorption|hsa04144,Endocytosis			http://www.uniprot.org/uniprot/M0R0N4	False
UBA5	1.55364	0.63565	Q9GZZ9	UBA5	GO:0048583,regulation of response to stimulus|GO:1990592,protein K69-linked ufmylation|GO:0023052,signaling|GO:0007165,signal transduction|GO:0023051,regulation of signaling|GO:0010646,regulation of cell communication|GO:0050789,regulation of biological process|GO:0044699,single-organism process|GO:0044267,cellular protein metabolic process|GO:0051716,cellular response to stimulus|GO:0030522,intr…	GO:0005737,cytoplasm|GO:0043231,intracellular membrane-bounded organelle|GO:0005829,cytosol|GO:0044464,cell part|GO:0044444,cytoplasmic part|GO:0005623,cell|GO:0043226,organelle|GO:0043229,intracellular organelle|GO:0044424,intracellular part|GO:0005622,intracellular|GO:0043227,membrane-bounded organelle|GO:0005634,nucleus|GO:0005794,Golgi apparatus|GO:0012505,endomembrane system	GO:0035639,purine ribonucleoside triphosphate binding|GO:0005488,binding|GO:0043167,ion binding|GO:1901363,heterocyclic compound binding|GO:1901265,nucleoside phosphate binding|GO:0001882,nucleoside binding|GO:0043168,anion binding|GO:0043169,cation binding|GO:0008641,small protein activating enzyme activity|GO:0000166,nucleotide binding|GO:0001883,purine nucleoside binding|GO:0032549,ribonucleos…				http://www.uniprot.org/uniprot/Q9GZZ9	False
EIF4EBP1	1.5295	0.613056	Q13541	EIF4EBP1	GO:0080090,regulation of primary metabolic process|GO:0019222,regulation of metabolic process|GO:0000082,G1/S transition of mitotic cell cycle|GO:0007165,signal transduction|GO:0007166,cell surface receptor signaling pathway|GO:0007167,enzyme linked receptor protein signaling pathway|GO:0007169,transmembrane receptor protein tyrosine kinase signaling pathway|GO:0071840,cellular component organiza…	GO:0031974,membrane-enclosed lumen|GO:0043229,intracellular organelle|GO:0043227,membrane-bounded organelle|GO:0043226,organelle|GO:0005737,cytoplasm|GO:0031981,nuclear lumen|GO:0005634,nucleus|GO:0005654,nucleoplasm|GO:0043234,protein complex|GO:0032991,macromolecular complex|GO:0043231,intracellular membrane-bounded organelle|GO:0043233,organelle lumen|GO:0005829,cytosol|GO:0044464,cell part|GO…	GO:0051721,protein phosphatase 2A binding|GO:0045182,translation regulator activity|GO:0030371,translation repressor activity|GO:0019899,enzyme binding|GO:0019903,protein phosphatase binding|GO:0019902,phosphatase binding|GO:0005488,binding|GO:0005515,protein binding|GO:0008190,eukaryotic initiation factor 4E binding|GO:0031369,translation initiation factor binding	hsa05231,Choline metabolism in cancer|hsa04218,Cellular senescence|hsa01521,EGFR tyrosine kinase inhibitor resistance|hsa04012,ErbB signaling pathway|hsa04211,Longevity regulating pathway|hsa04910,Insulin signaling pathway|hsa05168,Herpes simplex infection|hsa03013,RNA transport|hsa05221,Acute myeloid leukemia|hsa04066,HIF-1 signaling pathway|hsa05165,Human papillomavirus infection|hsa05163,Human…			http://www.uniprot.org/uniprot/Q13541	False
ABCB6	1.51469	0.599018	Q9NP58	ABCB6	GO:0032502,developmental process|GO:0044707,single-multicellular organism process|GO:0008152,metabolic process|GO:1901566,organonitrogen compound biosynthetic process|GO:0050801,ion homeostasis|GO:0006778,porphyrin-containing compound metabolic process|GO:0006779,porphyrin-containing compound biosynthetic process|GO:0042592,homeostatic process|GO:0044249,cellular biosynthetic process|GO:0034641,c…	GO:0005783,endoplasmic reticulum|GO:0005794,Golgi apparatus|GO:0044421,extracellular region part|GO:0098573,intrinsic component of mitochondrial membrane|GO:0031090,organelle membrane|GO:0019867,outer membrane|GO:0098533,ATPase dependent transmembrane transport complex|GO:0031307,integral component of mitochondrial outer membrane|GO:0031306,intrinsic component of mitochondrial outer membrane|GO:0…	GO:0035639,purine ribonucleoside triphosphate binding|GO:0005488,binding|GO:0016887,ATPase activity|GO:0043167,ion binding|GO:1901363,heterocyclic compound binding|GO:0001883,purine nucleoside binding|GO:0001882,nucleoside binding|GO:0043168,anion binding|GO:0051184,cofactor transporter activity|GO:0042626,ATPase activity, coupled to transmembrane movement of substances|GO:0016820,hydrolase activ…	hsa02010,ABC transporters			http://www.uniprot.org/uniprot/Q9NP58	False
FN3KRP	1.50324	0.588076	Q9HA64	FN3KRP	GO:0016310,phosphorylation|GO:0009987,cellular process|GO:0044237,cellular metabolic process|GO:0006796,phosphate-containing compound metabolic process|GO:0008152,metabolic process|GO:0006793,phosphorus metabolic process|GO:0044267,cellular protein metabolic process|GO:1901564,organonitrogen compound metabolic process|GO:0044260,cellular macromolecule metabolic process|GO:0044238,primary metaboli…	GO:0005737,cytoplasm|GO:0005829,cytosol|GO:0044464,cell part|GO:0005623,cell|GO:0005622,intracellular|GO:0044444,cytoplasmic part|GO:0044424,intracellular part	GO:0016772,transferase activity, transferring phosphorus-containing groups|GO:0016740,transferase activity|GO:0016301,kinase activity|GO:0003824,catalytic activity|GO:0016773,phosphotransferase activity, alcohol group as acceptor|GO:0140096,catalytic activity, acting on a protein|GO:0102193,protein-ribulosamine 3-kinase activity				http://www.uniprot.org/uniprot/Q9HA64	False
SVIP	0.668059	-0.581952	Q8NHG7	SVIP	GO:0033157,regulation of intracellular protein transport|GO:1903061,positive regulation of protein lipidation|GO:0008104,protein localization|GO:0080090,regulation of primary metabolic process|GO:0032434,regulation of proteasomal ubiquitin-dependent protein catabolic process|GO:0032435,negative regulation of proteasomal ubiquitin-dependent protein catabolic process|GO:0051049,regulation of transp…	GO:0005783,endoplasmic reticulum|GO:0005789,endoplasmic reticulum membrane|GO:0042175,nuclear outer membrane-endoplasmic reticulum membrane network|GO:0043229,intracellular organelle|GO:0071944,cell periphery|GO:0005623,cell|GO:0000153,cytoplasmic ubiquitin ligase complex|GO:0043227,membrane-bounded organelle|GO:0043226,organelle|GO:0031224,intrinsic component of membrane|GO:0031225,anchored comp…	GO:0051117,ATPase binding|GO:0019899,enzyme binding|GO:0005488,binding|GO:0005515,protein binding|GO:0043621,protein self-association	hsa04141,Protein processing in endoplasmic reticulum			http://www.uniprot.org/uniprot/Q8NHG7	False
PAFAH1B2	0.662779	-0.593401	P68402	PAFAH1B2	GO:0009896,positive regulation of catabolic process|GO:0032106,positive regulation of response to extracellular stimulus|GO:0009894,regulation of catabolic process|GO:0016239,positive regulation of macroautophagy|GO:0009893,positive regulation of metabolic process|GO:0031329,regulation of cellular catabolic process|GO:0032107,regulation of response to nutrient levels|GO:0006950,response to stress…	GO:0031974,membrane-enclosed lumen|GO:0043229,intracellular organelle|GO:0043228,non-membrane-bounded organelle|GO:0043227,membrane-bounded organelle|GO:0043226,organelle|GO:0005737,cytoplasm|GO:0070062,extracellular exosome|GO:0031981,nuclear lumen|GO:0005730,nucleolus|GO:0005634,nucleus|GO:0016020,membrane|GO:0031988,membrane-bounded vesicle|GO:0005576,extracellular region|GO:0005886,plasma mem…	GO:0005488,binding|GO:0016787,hydrolase activity|GO:0016407,acetyltransferase activity|GO:0052689,carboxylic ester hydrolase activity|GO:0016788,hydrolase activity, acting on ester bonds|GO:0003824,catalytic activity|GO:0016740,transferase activity|GO:0003847,1-alkyl-2-acetylglycerophosphocholine esterase activity|GO:0016747,transferase activity, transferring acyl groups other than amino-acyl gro…	hsa01100,Metabolic pathways|hsa00565,Ether lipid metabolism			http://www.uniprot.org/uniprot/P68402	False
STAM	0.66097	-0.597342	Q92783	STAM	GO:0008104,protein localization|GO:0051046,regulation of secretion|GO:0051047,positive regulation of secretion|GO:0051049,regulation of transport|GO:0048585,negative regulation of response to stimulus|GO:0048584,positive regulation of response to stimulus|GO:0048583,regulation of response to stimulus|GO:0061024,membrane organization|GO:0007165,signal transduction|GO:0007166,cell surface receptor …	GO:0043229,intracellular organelle|GO:0043227,membrane-bounded organelle|GO:0043226,organelle|GO:0010008,endosome membrane|GO:0005737,cytoplasm|GO:0031090,organelle membrane|GO:0098805,whole membrane|GO:0016020,membrane|GO:0031901,early endosome membrane|GO:0098588,bounding membrane of organelle|GO:0012505,endomembrane system|GO:0043231,intracellular membrane-bounded organelle|GO:0005829,cytosol|…	GO:0005070,SH3/SH2 adaptor activity|GO:0030674,protein binding, bridging|GO:0035591,signaling adaptor activity|GO:0005488,binding|GO:0005515,protein binding|GO:0060090,binding, bridging|GO:0044389,ubiquitin-like protein ligase binding|GO:0019899,enzyme binding	hsa04144,Endocytosis|hsa04630,Jak-STAT signaling pathway			http://www.uniprot.org/uniprot/Q92783	False
PPP6R3	0.660769	-0.597782	E9PKG4	PPP6R3	GO:0019220,regulation of phosphate metabolic process|GO:0080090,regulation of primary metabolic process|GO:0019222,regulation of metabolic process|GO:0016311,dephosphorylation|GO:0010921,regulation of phosphatase activity|GO:0031323,regulation of cellular metabolic process|GO:0031399,regulation of protein modification process|GO:0006807,nitrogen compound metabolic process|GO:0050789,regulation of…		GO:0019899,enzyme binding|GO:0019903,protein phosphatase binding|GO:0019902,phosphatase binding|GO:0005488,binding|GO:0005515,protein binding				http://www.uniprot.org/uniprot/E9PKG4	False
PSMB3	0.66011	-0.599222	P49720	PSMB3	GO:0080090,regulation of primary metabolic process|GO:0019222,regulation of metabolic process|GO:0048585,negative regulation of response to stimulus|GO:0048584,positive regulation of response to stimulus|GO:0048583,regulation of response to stimulus|GO:0031349,positive regulation of defense response|GO:0030111,regulation of Wnt signaling pathway|GO:0007165,signal transduction|GO:0007166,cell surf…	GO:0015629,actin cytoskeleton|GO:0031974,membrane-enclosed lumen|GO:0043229,intracellular organelle|GO:0043228,non-membrane-bounded organelle|GO:0005622,intracellular|GO:0043227,membrane-bounded organelle|GO:0043226,organelle|GO:0005856,cytoskeleton|GO:0070062,extracellular exosome|GO:0031981,nuclear lumen|GO:0005634,nucleus|GO:0005739,mitochondrion|GO:0031988,membrane-bounded vesicle|GO:0005654,…	GO:0016787,hydrolase activity|GO:0004175,endopeptidase activity|GO:0004298,threonine-type endopeptidase activity|GO:0003824,catalytic activity|GO:0070003,threonine-type peptidase activity|GO:0070011,peptidase activity, acting on L-amino acid peptides|GO:0005488,binding|GO:0005515,protein binding|GO:0008233,peptidase activity|GO:0140096,catalytic activity, acting on a protein	hsa03050,Proteasome			http://www.uniprot.org/uniprot/P49720	False
PSMA4	0.659905	-0.599669	P25789	PSMA4	GO:0080090,regulation of primary metabolic process|GO:0019222,regulation of metabolic process|GO:0048585,negative regulation of response to stimulus|GO:0048584,positive regulation of response to stimulus|GO:0048583,regulation of response to stimulus|GO:0031349,positive regulation of defense response|GO:0030111,regulation of Wnt signaling pathway|GO:0007165,signal transduction|GO:0007166,cell surf…	GO:0035770,ribonucleoprotein granule|GO:0019773,proteasome core complex, alpha-subunit complex|GO:0031974,membrane-enclosed lumen|GO:0043229,intracellular organelle|GO:0043228,non-membrane-bounded organelle|GO:0036464,cytoplasmic ribonucleoprotein granule|GO:0030529,intracellular ribonucleoprotein complex|GO:0043227,membrane-bounded organelle|GO:0043226,organelle|GO:0005737,cytoplasm|GO:0070062,e…	GO:0016787,hydrolase activity|GO:0004175,endopeptidase activity|GO:0004298,threonine-type endopeptidase activity|GO:0003824,catalytic activity|GO:0070003,threonine-type peptidase activity|GO:0070011,peptidase activity, acting on L-amino acid peptides|GO:0005488,binding|GO:0005515,protein binding|GO:0008233,peptidase activity|GO:0140096,catalytic activity, acting on a protein	hsa03050,Proteasome			http://www.uniprot.org/uniprot/P25789	False
YBX3	0.659357	-0.600868	P16989	YBX3	GO:2001234,negative regulation of apoptotic signaling pathway|GO:0048639,positive regulation of developmental growth|GO:0080090,regulation of primary metabolic process|GO:0019222,regulation of metabolic process|GO:2001233,regulation of apoptotic signaling pathway|GO:0048585,negative regulation of response to stimulus|GO:0048583,regulation of response to stimulus|GO:0006139,nucleobase-containing c…	GO:0005737,cytoplasm|GO:0005844,polysome|GO:0005622,intracellular|GO:0032991,macromolecular complex|GO:0043231,intracellular membrane-bounded organelle|GO:0043296,apical junction complex|GO:0005634,nucleus|GO:0044464,cell part|GO:0044444,cytoplasmic part|GO:0005623,cell|GO:0043226,organelle|GO:0044424,intracellular part|GO:0043229,intracellular organelle|GO:0005911,cell-cell junction|GO:0070160,o…	GO:0001012,RNA polymerase II regulatory region DNA binding|GO:0019899,enzyme binding|GO:0031267,small GTPase binding|GO:0051020,GTPase binding|GO:0005488,binding|GO:0003676,nucleic acid binding|GO:0003677,DNA binding|GO:1901363,heterocyclic compound binding|GO:0043565,sequence-specific DNA binding|GO:0043566,structure-specific DNA binding|GO:0003714,transcription corepressor activity|GO:0003712,t…	hsa04530,Tight junction			http://www.uniprot.org/uniprot/P16989	False
ENO2	0.658719	-0.602266	P09104	ENO2	GO:0009167,purine ribonucleoside monophosphate metabolic process|GO:0061621,canonical glycolysis|GO:0061620,glycolytic process through glucose-6-phosphate|GO:0044281,small molecule metabolic process|GO:0009161,ribonucleoside monophosphate metabolic process|GO:1901360,organic cyclic compound metabolic process|GO:0044712,single-organism catabolic process|GO:0044710,single-organism metabolic process…	GO:0071944,cell periphery|GO:0043227,membrane-bounded organelle|GO:0043226,organelle|GO:0005737,cytoplasm|GO:0031982,vesicle|GO:0043209,myelin sheath|GO:0005615,extracellular space|GO:0016020,membrane|GO:0031988,membrane-bounded vesicle|GO:0097458,neuron part|GO:0005576,extracellular region|GO:0043025,neuronal cell body|GO:0043234,protein complex|GO:1902494,catalytic complex|GO:0044297,cell body|…	GO:0043169,cation binding|GO:0043167,ion binding|GO:0016835,carbon-oxygen lyase activity|GO:0016836,hydro-lyase activity|GO:0000287,magnesium ion binding|GO:0004634,phosphopyruvate hydratase activity|GO:0003824,catalytic activity|GO:0005488,binding|GO:0046872,metal ion binding|GO:0016829,lyase activity|GO:0005515,protein binding	hsa01100,Metabolic pathways|hsa01200,Carbon metabolism|hsa04066,HIF-1 signaling pathway|hsa01230,Biosynthesis of amino acids|hsa00010,Glycolysis / Gluconeogenesis|hsa03018,RNA degradation	H00013,Small cell lung cancer|H00043,Neuroblastoma		http://www.uniprot.org/uniprot/P09104	False
S100A6	0.652712	-0.61548	P06703	S100A6	GO:0042127,regulation of cell proliferation|GO:0044707,single-multicellular organism process|GO:0030030,cell projection organization|GO:0048146,positive regulation of fibroblast proliferation|GO:0048145,regulation of fibroblast proliferation|GO:0048144,fibroblast proliferation|GO:0048468,cell development|GO:0032501,multicellular organismal process|GO:0023052,signaling|GO:0007165,signal transducti…	GO:0019897,extrinsic component of plasma membrane|GO:0016020,membrane|GO:0009898,cytoplasmic side of plasma membrane|GO:0019898,extrinsic component of membrane|GO:0043229,intracellular organelle|GO:0071944,cell periphery|GO:0098552,side of membrane|GO:0043227,membrane-bounded organelle|GO:0043226,organelle|GO:0005737,cytoplasm|GO:0001726,ruffle|GO:0042995,cell projection|GO:0031982,vesicle|GO:003…	GO:0022891,substrate-specific transmembrane transporter activity|GO:0043169,cation binding|GO:0022892,substrate-specific transporter activity|GO:0005515,protein binding|GO:0046914,transition metal ion binding|GO:0044548,S100 protein binding|GO:0005215,transporter activity|GO:0008092,cytoskeletal protein binding|GO:0005488,binding|GO:0043167,ion binding|GO:0015075,ion transmembrane transporter act…				http://www.uniprot.org/uniprot/P06703	False
CSNK1A1	0.652691	-0.615528	P48729	CSNK1A1	GO:0022604,regulation of cell morphogenesis|GO:0048856,anatomical structure development|GO:0006909,phagocytosis|GO:0022603,regulation of anatomical structure morphogenesis|GO:0090263,positive regulation of canonical Wnt signaling pathway|GO:0016310,phosphorylation|GO:0048584,positive regulation of response to stimulus|GO:0048583,regulation of response to stimulus|GO:1903047,mitotic cell cycle pro…	GO:0044464,cell part|GO:0031974,membrane-enclosed lumen|GO:0043229,intracellular organelle|GO:0043228,non-membrane-bounded organelle|GO:0005929,cilium|GO:0005622,intracellular|GO:0043227,membrane-bounded organelle|GO:0043226,organelle|GO:0016607,nuclear speck|GO:0016604,nuclear body|GO:0031981,nuclear lumen|GO:0005813,centrosome|GO:0005634,nucleus|GO:0016020,membrane|GO:0005815,microtubule organi…	GO:0035639,purine ribonucleoside triphosphate binding|GO:0004672,protein kinase activity|GO:0043167,ion binding|GO:1901363,heterocyclic compound binding|GO:0001883,purine nucleoside binding|GO:0001882,nucleoside binding|GO:0043168,anion binding|GO:0000166,nucleotide binding|GO:0004674,protein serine/threonine kinase activity|GO:0016740,transferase activity|GO:1901265,nucleoside phosphate binding|…	hsa04340,Hedgehog signaling pathway|hsa05226,Gastric cancer|hsa05225,Hepatocellular carcinoma|hsa05224,Breast cancer|hsa05165,Human papillomavirus infection|hsa04310,Wnt signaling pathway			http://www.uniprot.org/uniprot/P48729	False
LSM3	0.648438	-0.62496	P62310	LSM3	GO:0090304,nucleic acid metabolic process|GO:0034641,cellular nitrogen compound metabolic process|GO:0006807,nitrogen compound metabolic process|GO:0044237,cellular metabolic process|GO:1901360,organic cyclic compound metabolic process|GO:1901361,organic cyclic compound catabolic process|GO:0006139,nucleobase-containing compound metabolic process|GO:1901575,organic substance catabolic process|GO:…	GO:0005737,cytoplasm|GO:0005829,cytosol|GO:0005622,intracellular|GO:0032991,macromolecular complex|GO:0043231,intracellular membrane-bounded organelle|GO:0071013,catalytic step 2 spliceosome|GO:0044464,cell part|GO:0044444,cytoplasmic part|GO:0005623,cell|GO:0043226,organelle|GO:0044446,intracellular organelle part|GO:0043229,intracellular organelle|GO:0044428,nuclear part|GO:0044422,organelle pa…	GO:0003676,nucleic acid binding|GO:0097159,organic cyclic compound binding|GO:0044822,poly(A) RNA binding|GO:0003723,RNA binding|GO:0005515,protein binding|GO:1901363,heterocyclic compound binding|GO:0005488,binding	hsa03040,Spliceosome|hsa03018,RNA degradation			http://www.uniprot.org/uniprot/P62310	False
FAH	0.643807	-0.635301	P16930	FAH	GO:0009065,glutamine family amino acid catabolic process|GO:0019752,carboxylic acid metabolic process|GO:0009063,cellular amino acid catabolic process|GO:0009074,aromatic amino acid family catabolic process|GO:0034641,cellular nitrogen compound metabolic process|GO:0006807,nitrogen compound metabolic process|GO:0044281,small molecule metabolic process|GO:0044282,small molecule catabolic process|G…	GO:0005737,cytoplasm|GO:0005622,intracellular|GO:0043230,extracellular organelle|GO:0031982,vesicle|GO:0044421,extracellular region part|GO:0043227,membrane-bounded organelle|GO:0005829,cytosol|GO:0044464,cell part|GO:0005623,cell|GO:0031988,membrane-bounded vesicle|GO:0044444,cytoplasmic part|GO:0005576,extracellular region|GO:0044424,intracellular part|GO:1903561,extracellular vesicle|GO:006501…	GO:0016823,hydrolase activity, acting on acid carbon-carbon bonds, in ketonic substances|GO:0016787,hydrolase activity|GO:0016822,hydrolase activity, acting on acid carbon-carbon bonds|GO:0043169,cation binding|GO:0043167,ion binding|GO:0004334,fumarylacetoacetase activity|GO:0003824,catalytic activity|GO:0005488,binding|GO:0005515,protein binding|GO:0046872,metal ion binding	hsa01100,Metabolic pathways|hsa00350,Tyrosine metabolism			http://www.uniprot.org/uniprot/P16930	False
PSMG4	0.640528	-0.642667	Q5JS54	PSMG4	GO:0022607,cellular component assembly|GO:0071822,protein complex subunit organization|GO:0070271,protein complex biogenesis|GO:0043933,macromolecular complex subunit organization|GO:0006461,protein complex assembly|GO:0016043,cellular component organization|GO:0065003,macromolecular complex assembly|GO:0044085,cellular component biogenesis|GO:0043248,proteasome assembly|GO:0034622,cellular macro…						http://www.uniprot.org/uniprot/Q5JS54	False
SERPINB1	0.628716	-0.669519	P30740	SERPINB1	GO:0009892,negative regulation of metabolic process|GO:0080090,regulation of primary metabolic process|GO:0019222,regulation of metabolic process|GO:0031324,negative regulation of cellular metabolic process|GO:0031323,regulation of cellular metabolic process|GO:0043086,negative regulation of catalytic activity|GO:0044267,cellular protein metabolic process|GO:0051248,negative regulation of protein…	GO:0005737,cytoplasm|GO:0005622,intracellular|GO:0043230,extracellular organelle|GO:0031982,vesicle|GO:0044421,extracellular region part|GO:0043227,membrane-bounded organelle|GO:0016020,membrane|GO:0044464,cell part|GO:0005623,cell|GO:0031988,membrane-bounded vesicle|GO:0005576,extracellular region|GO:0005615,extracellular space|GO:0044424,intracellular part|GO:1903561,extracellular vesicle|GO:00…	GO:0004866,endopeptidase inhibitor activity|GO:0061135,endopeptidase regulator activity|GO:0061134,peptidase regulator activity|GO:0030414,peptidase inhibitor activity|GO:0004867,serine-type endopeptidase inhibitor activity|GO:0004857,enzyme inhibitor activity|GO:0098772,molecular function regulator|GO:0030234,enzyme regulator activity|GO:0005515,protein binding|GO:0005488,binding	hsa05146,Amoebiasis			http://www.uniprot.org/uniprot/P30740	False
MAP2K1	0.628093	-0.67095	Q02750	MAP2K1	GO:0051049,regulation of transport|GO:0098779,mitophagy in response to mitochondrial depolarization|GO:0051656,establishment of organelle localization|GO:0051650,establishment of vesicle localization|GO:0051716,cellular response to stimulus|GO:0000165,MAPK cascade|GO:0030855,epithelial cell differentiation|GO:0060541,respiratory system development|GO:0031103,axon regeneration|GO:0031102,neuron pr…	GO:0042995,cell projection|GO:0016020,membrane|GO:0005783,endoplasmic reticulum|GO:0044421,extracellular region part|GO:0030425,dendrite|GO:0030424,axon|GO:0043229,intracellular organelle|GO:0043228,non-membrane-bounded organelle|GO:0005924,cell-substrate adherens junction|GO:0005815,microtubule organizing center|GO:0005874,microtubule|GO:0043226,organelle|GO:0030054,cell junction|GO:0030055,cell…	GO:0005488,binding|GO:0008022,protein C-terminus binding|GO:0016791,phosphatase activity|GO:0019207,kinase regulator activity|GO:0035639,purine ribonucleoside triphosphate binding|GO:0019209,kinase activator activity|GO:0019899,enzyme binding|GO:0042578,phosphoric ester hydrolase activity|GO:0060089,molecular transducer activity|GO:0051020,GTPase binding|GO:0019900,kinase binding|GO:0008047,enzym…	hsa04550,Signaling pathways regulating pluripotency of stem cells|hsa05219,Bladder cancer|hsa04510,Focal adhesion|hsa05135,unkown|hsa04022,cGMP-PKG signaling pathway|hsa04650,Natural killer cell mediated cytotoxicity|hsa05210,Colorectal cancer|hsa04726,Serotonergic synapse|hsa05216,Thyroid cancer|hsa05218,Melanoma|hsa04024,cAMP signaling pathway|hsa05215,Prostate cancer|hsa04140,Regulation of aut…		D09666,Selumetinib (USAN/INN)|D10024,Selumetinib sulfate (JAN/USAN)|D10175,Trametinib (USAN)|D10176,Trametinib dimethyl sulfoxide (JAN/USAN); Mekinist (TN)|D10426,Pimasertib (USAN/INN)|D10486,Pimasertib hydrochloride (USAN)|D10604,Binimetinib (JAN/USAN)	http://www.uniprot.org/uniprot/Q02750	False
ACYP1	0.622025	-0.684955	P07311	ACYP1	GO:0009987,cellular process|GO:0044237,cellular metabolic process|GO:0006796,phosphate-containing compound metabolic process|GO:0008152,metabolic process|GO:0006793,phosphorus metabolic process	GO:0043230,extracellular organelle|GO:0031982,vesicle|GO:0044421,extracellular region part|GO:0043227,membrane-bounded organelle|GO:0031988,membrane-bounded vesicle|GO:0005576,extracellular region|GO:1903561,extracellular vesicle|GO:0065010,extracellular membrane-bounded organelle|GO:0043226,organelle|GO:0070062,extracellular exosome	GO:0016787,hydrolase activity|GO:0016818,hydrolase activity, acting on acid anhydrides, in phosphorus-containing anhydrides|GO:0016817,hydrolase activity, acting on acid anhydrides|GO:0003824,catalytic activity|GO:0003998,acylphosphatase activity	hsa00620,Pyruvate metabolism|hsa01100,Metabolic pathways			http://www.uniprot.org/uniprot/P07311	False
MPST	0.6179	-0.694554	P25325	MPST	GO:0044707,single-multicellular organism process|GO:0061008,hepaticobiliary system development|GO:0044237,cellular metabolic process|GO:0021510,spinal cord development|GO:0019752,carboxylic acid metabolic process|GO:0044248,cellular catabolic process|GO:0044249,cellular biosynthetic process|GO:0034641,cellular nitrogen compound metabolic process|GO:0006807,nitrogen compound metabolic process|GO:0…	GO:0044464,cell part|GO:0031975,envelope|GO:0043229,intracellular organelle|GO:0045202,synapse|GO:0043227,membrane-bounded organelle|GO:0043226,organelle|GO:0030054,cell junction|GO:0005737,cytoplasm|GO:0042995,cell projection|GO:0031090,organelle membrane|GO:0016020,membrane|GO:0044444,cytoplasmic part|GO:0005739,mitochondrion|GO:0031988,membrane-bounded vesicle|GO:0097458,neuron part|GO:0043005…	GO:0016784,3-mercaptopyruvate sulfurtransferase activity|GO:0016782,transferase activity, transferring sulfur-containing groups|GO:0016783,sulfurtransferase activity|GO:0003824,catalytic activity|GO:0016740,transferase activity|GO:0005488,binding|GO:0005515,protein binding|GO:0004792,thiosulfate sulfurtransferase activity|GO:0042802,identical protein binding	hsa00920,Sulfur metabolism|hsa00270,Cysteine and methionine metabolism|hsa01100,Metabolic pathways|hsa04122,Sulfur relay system			http://www.uniprot.org/uniprot/P25325	False
KRAS	0.617786	-0.69482	P01116	KRAS	GO:0007599,hemostasis|GO:0007596,blood coagulation|GO:0051716,cellular response to stimulus|GO:0000165,MAPK cascade|GO:0060541,respiratory system development|GO:0035176,social behavior|GO:0048468,cell development|GO:0045859,regulation of protein kinase activity|GO:0097485,neuron projection guidance|GO:0046483,heterocycle metabolic process|GO:0042325,regulation of phosphorylation|GO:0042327,positi…	GO:0019897,extrinsic component of plasma membrane|GO:0009898,cytoplasmic side of plasma membrane|GO:0019898,extrinsic component of membrane|GO:0043229,intracellular organelle|GO:0071944,cell periphery|GO:0098552,side of membrane|GO:0005924,cell-substrate adherens junction|GO:0005925,focal adhesion|GO:0043227,membrane-bounded organelle|GO:0043226,organelle|GO:0030054,cell junction|GO:0030055,cell-…	GO:0035639,purine ribonucleoside triphosphate binding|GO:0044877,macromolecular complex binding|GO:0005488,binding|GO:0000166,nucleotide binding|GO:1901363,heterocyclic compound binding|GO:1901265,nucleoside phosphate binding|GO:0001882,nucleoside binding|GO:0043168,anion binding|GO:0043167,ion binding|GO:0032561,guanyl ribonucleotide binding|GO:0001883,purine nucleoside binding|GO:0032549,ribonu…	hsa04550,Signaling pathways regulating pluripotency of stem cells|hsa05219,Bladder cancer|hsa04929,unkown|hsa05212,Pancreatic cancer|hsa04650,Natural killer cell mediated cytotoxicity|hsa05210,Colorectal cancer|hsa04915,Estrogen signaling pathway|hsa05216,Thyroid cancer|hsa05218,Melanoma|hsa05214,Glioma|hsa05215,Prostate cancer|hsa04140,Regulation of autophagy|hsa04722,Neurotrophin signaling path…	H00019,Pancreatic cancer|H00020,Colorectal cancer		http://www.uniprot.org/uniprot/P01116	False
EEF2	0.60545	-0.72392	P13639	EEF2	GO:0080090,regulation of primary metabolic process|GO:0019222,regulation of metabolic process|GO:0044710,single-organism metabolic process|GO:0044711,single-organism biosynthetic process|GO:0010604,positive regulation of macromolecule metabolic process|GO:0010608,posttranscriptional regulation of gene expression|GO:0043043,peptide biosynthetic process|GO:0002244,hematopoietic progenitor cell diff…	GO:0016234,inclusion body|GO:0016235,aggresome|GO:0043229,intracellular organelle|GO:0071944,cell periphery|GO:0030529,intracellular ribonucleoprotein complex|GO:0043227,membrane-bounded organelle|GO:0043226,organelle|GO:0005737,cytoplasm|GO:0031982,vesicle|GO:0005634,nucleus|GO:0016020,membrane|GO:0031988,membrane-bounded vesicle|GO:0005886,plasma membrane|GO:0032991,macromolecular complex|GO:19…	GO:0035639,purine ribonucleoside triphosphate binding|GO:0019899,enzyme binding|GO:0005488,binding|GO:0003676,nucleic acid binding|GO:0043167,ion binding|GO:1901363,heterocyclic compound binding|GO:0001883,purine nucleoside binding|GO:0001882,nucleoside binding|GO:0043168,anion binding|GO:0016462,pyrophosphatase activity|GO:0000166,nucleotide binding|GO:0032561,guanyl ribonucleotide binding|GO:19…	hsa04152,AMPK signaling pathway|hsa04921,Oxytocin signaling pathway			http://www.uniprot.org/uniprot/P13639	False
ALDOC	0.602865	-0.730092	P09972	ALDOC	GO:0009167,purine ribonucleoside monophosphate metabolic process|GO:0061621,canonical glycolysis|GO:0061620,glycolytic process through glucose-6-phosphate|GO:0044281,small molecule metabolic process|GO:0009161,ribonucleoside monophosphate metabolic process|GO:1901360,organic cyclic compound metabolic process|GO:0044712,single-organism catabolic process|GO:0044710,single-organism metabolic process…	GO:0043229,intracellular organelle|GO:0043228,non-membrane-bounded organelle|GO:0043227,membrane-bounded organelle|GO:0043226,organelle|GO:0005856,cytoskeleton|GO:0031982,vesicle|GO:0005739,mitochondrion|GO:0031988,membrane-bounded vesicle|GO:0005737,cytoplasm|GO:1903561,extracellular vesicle|GO:0070062,extracellular exosome|GO:0043230,extracellular organelle|GO:0043231,intracellular membrane-bou…	GO:0005515,protein binding|GO:0008092,cytoskeletal protein binding|GO:0016829,lyase activity|GO:0016830,carbon-carbon lyase activity|GO:0016832,aldehyde-lyase activity|GO:0003824,catalytic activity|GO:0005488,binding|GO:0004332,fructose-bisphosphate aldolase activity	hsa01200,Carbon metabolism|hsa01100,Metabolic pathways|hsa00030,Pentose phosphate pathway|hsa04066,HIF-1 signaling pathway|hsa00051,Fructose and mannose metabolism|hsa01230,Biosynthesis of amino acids|hsa00010,Glycolysis / Gluconeogenesis			http://www.uniprot.org/uniprot/P09972	False
CFL1	0.595474	-0.74789	P23528	CFL1	GO:0006909,phagocytosis|GO:0048584,positive regulation of response to stimulus|GO:0048583,regulation of response to stimulus|GO:0016358,dendrite development|GO:0008064,regulation of actin polymerization or depolymerization|GO:0007163,establishment or maintenance of cell polarity|GO:0007165,signal transduction|GO:0007166,cell surface receptor signaling pathway|GO:0007167,enzyme linked receptor pro…	GO:0098590,plasma membrane region|GO:0015629,actin cytoskeleton|GO:0044421,extracellular region part|GO:0031974,membrane-enclosed lumen|GO:0043229,intracellular organelle|GO:0043228,non-membrane-bounded organelle|GO:0005924,cell-substrate adherens junction|GO:0005925,focal adhesion|GO:0043227,membrane-bounded organelle|GO:0043226,organelle|GO:0030054,cell junction|GO:0030055,cell-substrate juncti…	GO:0003779,actin binding|GO:0005488,binding|GO:0005515,protein binding|GO:0008092,cytoskeletal protein binding|GO:0043168,anion binding|GO:0035091,phosphatidylinositol binding|GO:0005543,phospholipid binding|GO:0008289,lipid binding|GO:0051015,actin filament binding|GO:0043167,ion binding|GO:1902936,phosphatidylinositol bisphosphate binding|GO:0019903,protein phosphatase binding|GO:0019902,phosph…	hsa05133,Pertussis|hsa04360,Axon guidance|hsa05170,Human immunodeficiency virus 1 infection|hsa04666,Fc gamma R-mediated phagocytosis|hsa04810,Regulation of actin cytoskeleton			http://www.uniprot.org/uniprot/P23528	False
WIPI2	0.59321	-0.753385	Q9Y4P8	WIPI2	GO:0009991,response to extracellular stimulus|GO:0022607,cellular component assembly|GO:0008152,metabolic process|GO:0006950,response to stress|GO:0016236,macroautophagy|GO:1903008,organelle disassembly|GO:0031667,response to nutrient levels|GO:0044248,cellular catabolic process|GO:0044249,cellular biosynthetic process|GO:0008104,protein localization|GO:0042157,lipoprotein metabolic process|GO:00…	GO:0031974,membrane-enclosed lumen|GO:0019898,extrinsic component of membrane|GO:0034045,pre-autophagosomal structure membrane|GO:0043229,intracellular organelle|GO:0043227,membrane-bounded organelle|GO:0043226,organelle|GO:0005737,cytoplasm|GO:0031090,organelle membrane|GO:0031981,nuclear lumen|GO:0005773,vacuole|GO:0005634,nucleus|GO:0016020,membrane|GO:0005776,autophagosome|GO:0005654,nucleopl…	GO:0043168,anion binding|GO:0080025,phosphatidylinositol-3,5-bisphosphate binding|GO:0035091,phosphatidylinositol binding|GO:0005543,phospholipid binding|GO:0032266,phosphatidylinositol-3-phosphate binding|GO:0043167,ion binding|GO:1902936,phosphatidylinositol bisphosphate binding|GO:0005515,protein binding|GO:0008289,lipid binding|GO:1901981,phosphatidylinositol phosphate binding|GO:0005488,bind…	hsa04140,Regulation of autophagy|hsa04136,unkown			http://www.uniprot.org/uniprot/Q9Y4P8	False
CHORDC1	0.587938	-0.766265	Q9UHD1	CHORDC1	GO:0043549,regulation of kinase activity|GO:0019220,regulation of phosphate metabolic process|GO:0080090,regulation of primary metabolic process|GO:0019222,regulation of metabolic process|GO:0034605,cellular response to heat|GO:0048583,regulation of response to stimulus|GO:0071840,cellular component organization or biogenesis|GO:0051716,cellular response to stimulus|GO:0010605,negative regulation…		GO:0043169,cation binding|GO:0046914,transition metal ion binding|GO:0031072,heat shock protein binding|GO:0043167,ion binding|GO:0008270,zinc ion binding|GO:0005515,protein binding|GO:0046872,metal ion binding|GO:0051879,Hsp90 protein binding|GO:0005488,binding|GO:0035639,purine ribonucleoside triphosphate binding|GO:1901363,heterocyclic compound binding|GO:1901265,nucleoside phosphate binding|G…				http://www.uniprot.org/uniprot/Q9UHD1	False
PURA	0.552241	-0.856631	Q00577	PURA	GO:0080090,regulation of primary metabolic process|GO:0019222,regulation of metabolic process|GO:1901362,organic cyclic compound biosynthetic process|GO:0071840,cellular component organization or biogenesis|GO:0010605,negative regulation of macromolecule metabolic process|GO:0010608,posttranscriptional regulation of gene expression|GO:0043043,peptide biosynthetic process|GO:0006260,DNA replicatio…	GO:0031974,membrane-enclosed lumen|GO:0000781,chromosome, telomeric region|GO:0043229,intracellular organelle|GO:0005662,DNA replication factor A complex|GO:0000784,nuclear chromosome, telomeric region|GO:0000228,nuclear chromosome|GO:0043227,membrane-bounded organelle|GO:0043226,organelle|GO:0005737,cytoplasm|GO:0031981,nuclear lumen|GO:0097458,neuron part|GO:0005634,nucleus|GO:0044454,nuclear c…	GO:0005488,binding|GO:0003676,nucleic acid binding|GO:0003677,DNA binding|GO:1901363,heterocyclic compound binding|GO:0043565,sequence-specific DNA binding|GO:0043566,structure-specific DNA binding|GO:0000900,translation repressor activity, nucleic acid binding|GO:0008134,transcription factor binding|GO:0003690,double-stranded DNA binding|GO:0003691,double-stranded telomeric DNA binding|GO:000369…				http://www.uniprot.org/uniprot/Q00577	False
LDHB	0.547531	-0.868988	P07195	LDHB	GO:0019674,NAD metabolic process|GO:0006732,coenzyme metabolic process|GO:0006733,oxidoreduction coenzyme metabolic process|GO:0019752,carboxylic acid metabolic process|GO:1901615,organic hydroxy compound metabolic process|GO:0034641,cellular nitrogen compound metabolic process|GO:0006807,nitrogen compound metabolic process|GO:0046496,nicotinamide nucleotide metabolic process|GO:0006090,pyruvate …	GO:0043229,intracellular organelle|GO:0043227,membrane-bounded organelle|GO:0043226,organelle|GO:0005737,cytoplasm|GO:0031982,vesicle|GO:0043209,myelin sheath|GO:0098805,whole membrane|GO:0016020,membrane|GO:0005739,mitochondrion|GO:0031988,membrane-bounded vesicle|GO:0098589,membrane region|GO:1903561,extracellular vesicle|GO:0070062,extracellular exosome|GO:0043230,extracellular organelle|GO:00…	GO:0005488,binding|GO:0050662,coenzyme binding|GO:0016614,oxidoreductase activity, acting on CH-OH group of donors|GO:0005515,protein binding|GO:0016616,oxidoreductase activity, acting on the CH-OH group of donors, NAD or NADP as acceptor|GO:0019900,kinase binding|GO:0051287,NAD binding|GO:0019899,enzyme binding|GO:0000166,nucleotide binding|GO:0036094,small molecule binding|GO:0003824,catalytic …	hsa00270,Cysteine and methionine metabolism|hsa00620,Pyruvate metabolism|hsa01100,Metabolic pathways|hsa05230,Central carbon metabolism in cancer|hsa04066,HIF-1 signaling pathway|hsa00640,Propanoate metabolism|hsa00010,Glycolysis / Gluconeogenesis|hsa04922,Glucagon signaling pathway	H00010,Multiple myeloma|H00023,Testicular cancer|H00035,Ewing's sarcoma|H00043,Neuroblastoma		http://www.uniprot.org/uniprot/P07195	False
CUL5	0.540388	-0.887932	Q93034	CUL5	GO:0009628,response to abiotic stimulus|GO:0000082,G1/S transition of mitotic cell cycle|GO:0044257,cellular protein catabolic process|GO:0060322,head development|GO:0007165,signal transduction|GO:0098771,inorganic ion homeostasis|GO:0051716,cellular response to stimulus|GO:0045786,negative regulation of cell cycle|GO:0070647,protein modification by small protein conjugation or removal|GO:0044419…	GO:0043229,intracellular organelle|GO:0071944,cell periphery|GO:0043227,membrane-bounded organelle|GO:0043226,organelle|GO:0005737,cytoplasm|GO:0005634,nucleus|GO:0016020,membrane|GO:1902494,catalytic complex|GO:1990234,transferase complex|GO:0005886,plasma membrane|GO:0031461,cullin-RING ubiquitin ligase complex|GO:0031466,Cul5-RING ubiquitin ligase complex|GO:0043234,protein complex|GO:0032991,…	GO:0005261,cation channel activity|GO:0005262,calcium channel activity|GO:0019899,enzyme binding|GO:0060089,molecular transducer activity|GO:0004872,receptor activity|GO:0044389,ubiquitin-like protein ligase binding|GO:0019787,ubiquitin-like protein transferase activity|GO:0015085,calcium ion transmembrane transporter activity|GO:0061630,ubiquitin protein ligase activity|GO:0072509,divalent inorg…	hsa05170,Human immunodeficiency virus 1 infection|hsa04120,Ubiquitin mediated proteolysis			http://www.uniprot.org/uniprot/Q93034	False
HSPH1	0.528149	-0.920984	Q92598	HSPH1	GO:2001234,negative regulation of apoptotic signaling pathway|GO:1903037,regulation of leukocyte cell-cell adhesion|GO:0043549,regulation of kinase activity|GO:0019220,regulation of phosphate metabolic process|GO:0080090,regulation of primary metabolic process|GO:0019222,regulation of metabolic process|GO:2001233,regulation of apoptotic signaling pathway|GO:0048585,negative regulation of response…	GO:0031974,membrane-enclosed lumen|GO:0030139,endocytic vesicle|GO:0043229,intracellular organelle|GO:0043228,non-membrane-bounded organelle|GO:0060205,cytoplasmic membrane-bounded vesicle lumen|GO:0005622,intracellular|GO:0005874,microtubule|GO:0043226,organelle|GO:0005856,cytoskeleton|GO:0044433,cytoplasmic vesicle part|GO:0031983,vesicle lumen|GO:0031982,vesicle|GO:0031981,nuclear lumen|GO:001…	GO:0035639,purine ribonucleoside triphosphate binding|GO:0005488,binding|GO:0043167,ion binding|GO:1901363,heterocyclic compound binding|GO:1901265,nucleoside phosphate binding|GO:0001882,nucleoside binding|GO:0043168,anion binding|GO:0000166,nucleotide binding|GO:0001883,purine nucleoside binding|GO:0032549,ribonucleoside binding|GO:0017076,purine nucleotide binding|GO:0005524,ATP binding|GO:001…	hsa04141,Protein processing in endoplasmic reticulum			http://www.uniprot.org/uniprot/Q92598	False
IGBP1	0.523619	-0.933412	P78318	IGBP1	GO:2001234,negative regulation of apoptotic signaling pathway|GO:0019220,regulation of phosphate metabolic process|GO:0080090,regulation of primary metabolic process|GO:0019222,regulation of metabolic process|GO:2001233,regulation of apoptotic signaling pathway|GO:0006470,protein dephosphorylation|GO:0048585,negative regulation of response to stimulus|GO:0048583,regulation of response to stimulus…	GO:0005856,cytoskeleton|GO:0043234,protein complex|GO:0015630,microtubule cytoskeleton|GO:0043228,non-membrane-bounded organelle|GO:0043232,intracellular non-membrane-bounded organelle|GO:0005829,cytosol|GO:0044464,cell part|GO:0044444,cytoplasmic part|GO:0005623,cell|GO:0005737,cytoplasm|GO:0044446,intracellular organelle part|GO:0043229,intracellular organelle|GO:0044430,cytoskeletal part|GO:00…	GO:0051721,protein phosphatase 2A binding|GO:0031434,mitogen-activated protein kinase kinase binding|GO:0019888,protein phosphatase regulator activity|GO:0019208,phosphatase regulator activity|GO:0019899,enzyme binding|GO:0019901,protein kinase binding|GO:0019900,kinase binding|GO:0019903,protein phosphatase binding|GO:0019902,phosphatase binding|GO:0044877,macromolecular complex binding|GO:00199…	hsa04140,Regulation of autophagy|hsa04136,unkown			http://www.uniprot.org/uniprot/P78318	False
TPI1	0.517926	-0.949182	P60174	TPI1	GO:0009167,purine ribonucleoside monophosphate metabolic process|GO:0061621,canonical glycolysis|GO:0061620,glycolytic process through glucose-6-phosphate|GO:0044281,small molecule metabolic process|GO:0009161,ribonucleoside monophosphate metabolic process|GO:1901360,organic cyclic compound metabolic process|GO:0044712,single-organism catabolic process|GO:0044710,single-organism metabolic process…	GO:0043229,intracellular organelle|GO:0043227,membrane-bounded organelle|GO:0043226,organelle|GO:0005737,cytoplasm|GO:0031982,vesicle|GO:0005634,nucleus|GO:0031988,membrane-bounded vesicle|GO:1903561,extracellular vesicle|GO:0005615,extracellular space|GO:0043230,extracellular organelle|GO:0043231,intracellular membrane-bounded organelle|GO:0070062,extracellular exosome|GO:0005829,cytosol|GO:0044…	GO:0031625,ubiquitin protein ligase binding|GO:0044389,ubiquitin-like protein ligase binding|GO:0016853,isomerase activity|GO:0019899,enzyme binding|GO:0003824,catalytic activity|GO:0005488,binding|GO:0005515,protein binding|GO:0016860,intramolecular oxidoreductase activity|GO:0016861,intramolecular oxidoreductase activity, interconverting aldoses and ketoses|GO:0004807,triose-phosphate isomerase…	hsa00562,Inositol phosphate metabolism|hsa01100,Metabolic pathways|hsa01200,Carbon metabolism|hsa00051,Fructose and mannose metabolism|hsa01230,Biosynthesis of amino acids|hsa00010,Glycolysis / Gluconeogenesis			http://www.uniprot.org/uniprot/P60174	False
PNPO	0.508316	-0.976203	Q9NVS9	PNPO	GO:0050688,regulation of defense response to virus|GO:0019222,regulation of metabolic process|GO:0048584,positive regulation of response to stimulus|GO:0048583,regulation of response to stimulus|GO:0098779,mitophagy in response to mitochondrial depolarization|GO:0044281,small molecule metabolic process|GO:0044283,small molecule biosynthetic process|GO:1901362,organic cyclic compound biosynthetic …	GO:0031974,membrane-enclosed lumen|GO:0043229,intracellular organelle|GO:0043227,membrane-bounded organelle|GO:0043226,organelle|GO:0005737,cytoplasm|GO:0070062,extracellular exosome|GO:0031981,nuclear lumen|GO:0005634,nucleus|GO:0031988,membrane-bounded vesicle|GO:0005654,nucleoplasm|GO:1903561,extracellular vesicle|GO:0031982,vesicle|GO:0043230,extracellular organelle|GO:0043231,intracellular m…	GO:0043168,anion binding|GO:0050662,coenzyme binding|GO:0016638,oxidoreductase activity, acting on the CH-NH2 group of donors|GO:0097367,carbohydrate derivative binding|GO:0097159,organic cyclic compound binding|GO:0016641,oxidoreductase activity, acting on the CH-NH2 group of donors, oxygen as acceptor|GO:0004733,pyridoxamine-phosphate oxidase activity|GO:0000166,nucleotide binding|GO:0036094,sm…	hsa00750,Vitamin B6 metabolism|hsa01100,Metabolic pathways			http://www.uniprot.org/uniprot/Q9NVS9	False
DCAF11	0.500617	-0.998221	Q8TEB1	DCAF11	GO:0071704,organic substance metabolic process|GO:0044267,cellular protein metabolic process|GO:0044238,primary metabolic process|GO:0044260,cellular macromolecule metabolic process|GO:0032446,protein modification by small protein conjugation|GO:0019538,protein metabolic process|GO:0009987,cellular process|GO:0070647,protein modification by small protein conjugation or removal|GO:0006464,cellular…	GO:0031974,membrane-enclosed lumen|GO:0043229,intracellular organelle|GO:0043227,membrane-bounded organelle|GO:0043226,organelle|GO:0031981,nuclear lumen|GO:0005634,nucleus|GO:0080008,Cul4-RING E3 ubiquitin ligase complex|GO:0005654,nucleoplasm|GO:1902494,catalytic complex|GO:1990234,transferase complex|GO:0031461,cullin-RING ubiquitin ligase complex|GO:0043234,protein complex|GO:0032991,macromol…	GO:0005488,binding|GO:0005515,protein binding				http://www.uniprot.org/uniprot/Q8TEB1	False
AIDA	0.493444	-1.01904	Q96BJ3	AIDA	GO:0043549,regulation of kinase activity|GO:0019220,regulation of phosphate metabolic process|GO:0080090,regulation of primary metabolic process|GO:0019222,regulation of metabolic process|GO:0048585,negative regulation of response to stimulus|GO:0048583,regulation of response to stimulus|GO:0007165,signal transduction|GO:0023014,signal transduction by protein phosphorylation|GO:0044710,single-org…	GO:0005737,cytoplasm|GO:0044464,cell part|GO:0005623,cell|GO:0005622,intracellular|GO:0044424,intracellular part|GO:0016020,membrane	GO:0019904,protein domain specific binding|GO:0005515,protein binding|GO:0005488,binding|GO:0043168,anion binding|GO:0035091,phosphatidylinositol binding|GO:0005543,phospholipid binding|GO:0008289,lipid binding|GO:0043167,ion binding				http://www.uniprot.org/uniprot/Q96BJ3	False
HDHD2	0.492557	-1.02164	Q9H0R4	HDHD2	GO:0016311,dephosphorylation|GO:0009987,cellular process|GO:0044237,cellular metabolic process|GO:0006796,phosphate-containing compound metabolic process|GO:0008152,metabolic process|GO:0006793,phosphorus metabolic process	GO:0043230,extracellular organelle|GO:0031982,vesicle|GO:0044421,extracellular region part|GO:0043227,membrane-bounded organelle|GO:0031988,membrane-bounded vesicle|GO:0005576,extracellular region|GO:1903561,extracellular vesicle|GO:0065010,extracellular membrane-bounded organelle|GO:0043226,organelle|GO:0070062,extracellular exosome|GO:0005615,extracellular space	GO:0043169,cation binding|GO:0019899,enzyme binding|GO:0043167,ion binding|GO:0005488,binding|GO:0005515,protein binding|GO:0046872,metal ion binding|GO:0016787,hydrolase activity|GO:0016791,phosphatase activity|GO:0016788,hydrolase activity, acting on ester bonds|GO:0042578,phosphoric ester hydrolase activity|GO:0003824,catalytic activity				http://www.uniprot.org/uniprot/Q9H0R4	False
EIF4B	0.490105	-1.02884	E7EX17	EIF4B	GO:0022607,cellular component assembly|GO:0070271,protein complex biogenesis|GO:0043933,macromolecular complex subunit organization|GO:0044249,cellular biosynthetic process|GO:0034641,cellular nitrogen compound metabolic process|GO:0006807,nitrogen compound metabolic process|GO:0034645,cellular macromolecule biosynthetic process|GO:0034622,cellular macromolecular complex assembly|GO:1901576,organ…	GO:0005623,cell|GO:0044464,cell part|GO:0044297,cell body|GO:0030425,dendrite|GO:0097458,neuron part|GO:0036477,somatodendritic compartment|GO:0043005,neuron projection|GO:0043025,neuronal cell body|GO:0005737,cytoplasm|GO:0044424,intracellular part|GO:0005829,cytosol|GO:0044444,cytoplasmic part|GO:0005622,intracellular|GO:0045202,synapse|GO:0120038,plasma membrane bounded cell projection part|GO…	GO:0097159,organic cyclic compound binding|GO:0000166,nucleotide binding|GO:0036094,small molecule binding|GO:0005488,binding|GO:0003676,nucleic acid binding|GO:1901363,heterocyclic compound binding|GO:1901265,nucleoside phosphate binding|GO:0003723,RNA binding	hsa05205,Proteoglycans in cancer|hsa03013,RNA transport|hsa04150,mTOR signaling pathway|hsa04151,PI3K-Akt signaling pathway			http://www.uniprot.org/uniprot/E7EX17	False
GPHN	0.479613	-1.06006	Q9NQX3	GPHN	GO:0006777,Mo-molybdopterin cofactor biosynthetic process|GO:0050808,synapse organization|GO:0006732,coenzyme metabolic process|GO:0006807,nitrogen compound metabolic process|GO:0061024,membrane organization|GO:0022607,cellular component assembly|GO:0009108,coenzyme biosynthetic process|GO:0044281,small molecule metabolic process|GO:0051641,cellular localization|GO:1901576,organic substance biosy…	GO:0098590,plasma membrane region|GO:0043229,intracellular organelle|GO:0043228,non-membrane-bounded organelle|GO:0045202,synapse|GO:0005622,intracellular|GO:0043226,organelle|GO:0030054,cell junction|GO:0097060,synaptic membrane|GO:0098805,whole membrane|GO:0016020,membrane|GO:0098794,postsynapse|GO:0044456,synapse part|GO:0044459,plasma membrane part|GO:0005856,cytoskeleton|GO:0098589,membrane …	GO:0035639,purine ribonucleoside triphosphate binding|GO:0005488,binding|GO:0043167,ion binding|GO:1901363,heterocyclic compound binding|GO:1901265,nucleoside phosphate binding|GO:0001882,nucleoside binding|GO:0061599,molybdopterin molybdotransferase activity|GO:0061598,molybdopterin adenylyltransferase activity|GO:0000166,nucleotide binding|GO:0016740,transferase activity|GO:0001883,purine nucle…	hsa01100,Metabolic pathways|hsa00790,Folate biosynthesis|hsa04727,GABAergic synapse			http://www.uniprot.org/uniprot/Q9NQX3	False
RIC8A	0.462598	-1.11217	H0YE35	RIC8A	GO:0009893,positive regulation of metabolic process|GO:0019222,regulation of metabolic process|GO:0023052,signaling|GO:0007165,signal transduction|GO:0043087,regulation of GTPase activity|GO:0050789,regulation of biological process|GO:0044699,single-organism process|GO:0051716,cellular response to stimulus|GO:0043547,positive regulation of GTPase activity|GO:0051345,positive regulation of hydrola…	GO:0005737,cytoplasm|GO:0016020,membrane|GO:0044464,cell part|GO:0005623,cell|GO:0005622,intracellular|GO:0071944,cell periphery|GO:0005886,plasma membrane|GO:0044424,intracellular part	GO:0005085,guanyl-nucleotide exchange factor activity|GO:0030234,enzyme regulator activity|GO:0005096,GTPase activator activity|GO:0030695,GTPase regulator activity|GO:0001965,G-protein alpha-subunit binding|GO:0008047,enzyme activator activity|GO:0005515,protein binding|GO:0098772,molecular function regulator|GO:0060589,nucleoside-triphosphatase regulator activity|GO:0005488,binding				http://www.uniprot.org/uniprot/H0YE35	False
DTYMK	0.450646	-1.14993	P23919	DTYMK	GO:0009211,pyrimidine deoxyribonucleoside triphosphate metabolic process|GO:0009212,pyrimidine deoxyribonucleoside triphosphate biosynthetic process|GO:0009219,pyrimidine deoxyribonucleotide metabolic process|GO:0009165,nucleotide biosynthetic process|GO:0044281,small molecule metabolic process|GO:1901362,organic cyclic compound biosynthetic process|GO:1901360,organic cyclic compound metabolic pr…	GO:0031970,organelle envelope lumen|GO:0031974,membrane-enclosed lumen|GO:0031975,envelope|GO:0043229,intracellular organelle|GO:0043227,membrane-bounded organelle|GO:0043226,organelle|GO:0005737,cytoplasm|GO:0005740,mitochondrial envelope|GO:0005739,mitochondrion|GO:0005759,mitochondrial matrix|GO:0005758,mitochondrial intermembrane space|GO:0031967,organelle envelope|GO:0043231,intracellular me…	GO:0019201,nucleotide kinase activity|GO:0019205,nucleobase-containing compound kinase activity|GO:0035639,purine ribonucleoside triphosphate binding|GO:0005488,binding|GO:0004798,thymidylate kinase activity|GO:0009041,uridylate kinase activity|GO:0043167,ion binding|GO:1901363,heterocyclic compound binding|GO:0001883,purine nucleoside binding|GO:0001882,nucleoside binding|GO:0043168,anion bindin…	hsa01100,Metabolic pathways|hsa00240,Pyrimidine metabolism			http://www.uniprot.org/uniprot/P23919	False
HINT1	0.438723	-1.18862	P49773	HINT1	GO:0080090,regulation of primary metabolic process|GO:0019222,regulation of metabolic process|GO:0048584,positive regulation of response to stimulus|GO:0048583,regulation of response to stimulus|GO:0050848,regulation of calcium-mediated signaling|GO:0009166,nucleotide catabolic process|GO:0007165,signal transduction|GO:1901362,organic cyclic compound biosynthetic process|GO:1901360,organic cyclic…	GO:0031974,membrane-enclosed lumen|GO:0043229,intracellular organelle|GO:0043228,non-membrane-bounded organelle|GO:0043227,membrane-bounded organelle|GO:0043226,organelle|GO:0005856,cytoskeleton|GO:0070062,extracellular exosome|GO:0031981,nuclear lumen|GO:0005634,nucleus|GO:0016020,membrane|GO:0031988,membrane-bounded vesicle|GO:0005654,nucleoplasm|GO:0005576,extracellular region|GO:0044451,nucle…	GO:0016787,hydrolase activity|GO:0019900,kinase binding|GO:0019901,protein kinase binding|GO:0005080,protein kinase C binding|GO:0019899,enzyme binding|GO:0000166,nucleotide binding|GO:0036094,small molecule binding|GO:0003824,catalytic activity|GO:0005488,binding|GO:0005515,protein binding|GO:0097159,organic cyclic compound binding|GO:1901363,heterocyclic compound binding|GO:1901265,nucleoside p…				http://www.uniprot.org/uniprot/P49773	False
PDCD5	0.438575	-1.1891	O14737	PDCD5	GO:2001235,positive regulation of apoptotic signaling pathway|GO:0008104,protein localization|GO:0032388,positive regulation of intracellular transport|GO:0080090,regulation of primary metabolic process|GO:0019222,regulation of metabolic process|GO:2001233,regulation of apoptotic signaling pathway|GO:0051049,regulation of transport|GO:0032386,regulation of intracellular transport|GO:0048584,posit…	GO:0043231,intracellular membrane-bounded organelle|GO:0005737,cytoplasm|GO:0005622,intracellular|GO:0043230,extracellular organelle|GO:0031982,vesicle|GO:0044421,extracellular region part|GO:0043227,membrane-bounded organelle|GO:0005634,nucleus|GO:0044464,cell part|GO:0005623,cell|GO:0031988,membrane-bounded vesicle|GO:0043229,intracellular organelle|GO:0005576,extracellular region|GO:0044424,in…	GO:1901681,sulfur compound binding|GO:0043168,anion binding|GO:0015631,tubulin binding|GO:0005515,protein binding|GO:0048487,beta-tubulin binding|GO:0097367,carbohydrate derivative binding|GO:0097159,organic cyclic compound binding|GO:0030234,enzyme regulator activity|GO:0008092,cytoskeletal protein binding|GO:0008201,heparin binding|GO:0005539,glycosaminoglycan binding|GO:0043167,ion binding|GO:…				http://www.uniprot.org/uniprot/O14737	False
CTPS1	0.432169	-1.21033	P17812	CTPS1	GO:0009218,pyrimidine ribonucleotide metabolic process|GO:0009165,nucleotide biosynthetic process|GO:0009163,nucleoside biosynthetic process|GO:0046134,pyrimidine nucleoside biosynthetic process|GO:1901362,organic cyclic compound biosynthetic process|GO:0046131,pyrimidine ribonucleoside metabolic process|GO:0046132,pyrimidine ribonucleoside biosynthetic process|GO:0044710,single-organism metaboli…	GO:0005737,cytoplasm|GO:0005829,cytosol|GO:0016020,membrane|GO:0044464,cell part|GO:0005623,cell|GO:0005622,intracellular|GO:0044444,cytoplasmic part|GO:0044424,intracellular part|GO:0097268,cytoophidium	GO:0035639,purine ribonucleoside triphosphate binding|GO:0005488,binding|GO:0043167,ion binding|GO:1901363,heterocyclic compound binding|GO:1901265,nucleoside phosphate binding|GO:0001882,nucleoside binding|GO:0043168,anion binding|GO:0000166,nucleotide binding|GO:0016879,ligase activity, forming carbon-nitrogen bonds|GO:0003883,CTP synthase activity|GO:0001883,purine nucleoside binding|GO:003254…	hsa01100,Metabolic pathways|hsa00240,Pyrimidine metabolism			http://www.uniprot.org/uniprot/P17812	False
UBE2M	0.407859	-1.29386	P61081	UBE2M	GO:0048584,positive regulation of response to stimulus|GO:0048583,regulation of response to stimulus|GO:0031349,positive regulation of defense response|GO:0043523,regulation of neuron apoptotic process|GO:0007165,signal transduction|GO:0007166,cell surface receptor signaling pathway|GO:0007167,enzyme linked receptor protein signaling pathway|GO:0031347,regulation of defense response|GO:0051716,ce…	GO:0005737,cytoplasm|GO:0005622,intracellular|GO:0043230,extracellular organelle|GO:0031982,vesicle|GO:0044421,extracellular region part|GO:0043227,membrane-bounded organelle|GO:0005829,cytosol|GO:0044464,cell part|GO:0005623,cell|GO:0031988,membrane-bounded vesicle|GO:0044444,cytoplasmic part|GO:0005576,extracellular region|GO:0044424,intracellular part|GO:1903561,extracellular vesicle|GO:006501…	GO:0044389,ubiquitin-like protein ligase binding|GO:0018169,ribosomal S6-glutamic acid ligase activity|GO:0035639,purine ribonucleoside triphosphate binding|GO:0019899,enzyme binding|GO:0016881,acid-amino acid ligase activity|GO:0005488,binding|GO:0000166,nucleotide binding|GO:1901363,heterocyclic compound binding|GO:0001883,purine nucleoside binding|GO:0001882,nucleoside binding|GO:0019787,ubiqu…	hsa04120,Ubiquitin mediated proteolysis			http://www.uniprot.org/uniprot/P61081	False
AKR1E2	0.400328	-1.32074	Q96JD6	AKR1E2	GO:0009896,positive regulation of catabolic process|GO:0032106,positive regulation of response to extracellular stimulus|GO:0009894,regulation of catabolic process|GO:0016239,positive regulation of macroautophagy|GO:0009893,positive regulation of metabolic process|GO:0031329,regulation of cellular catabolic process|GO:0032101,regulation of response to external stimulus|GO:0031325,positive regulat…	GO:0005737,cytoplasm|GO:0005622,intracellular|GO:0043230,extracellular organelle|GO:0031982,vesicle|GO:0044421,extracellular region part|GO:0043227,membrane-bounded organelle|GO:0044464,cell part|GO:0005623,cell|GO:0031988,membrane-bounded vesicle|GO:0005576,extracellular region|GO:0044424,intracellular part|GO:1903561,extracellular vesicle|GO:0065010,extracellular membrane-bounded organelle|GO:0…	GO:0016614,oxidoreductase activity, acting on CH-OH group of donors|GO:0016616,oxidoreductase activity, acting on the CH-OH group of donors, NAD or NADP as acceptor|GO:0003824,catalytic activity|GO:0050571,1,5-anhydro-D-fructose reductase activity|GO:0016491,oxidoreductase activity|GO:0004033,aldo-keto reductase (NADP) activity|GO:0004032,alditol:NADP+ 1-oxidoreductase activity|GO:0008106,alcohol…				http://www.uniprot.org/uniprot/Q96JD6	False
NPEPPS	0.397576	-1.3307	H0YDG0	NPEPPS	GO:0044238,primary metabolic process|GO:0019538,protein metabolic process|GO:0043170,macromolecule metabolic process|GO:0071704,organic substance metabolic process|GO:0008152,metabolic process|GO:0006508,proteolysis|GO:1901564,organonitrogen compound metabolic process|GO:0006807,nitrogen compound metabolic process						http://www.uniprot.org/uniprot/H0YDG0	False
CLIC2	0.390112	-1.35804	O15247	CLIC2	GO:0051049,regulation of transport|GO:0032386,regulation of intracellular transport|GO:0051282,regulation of sequestering of calcium ion|GO:0051283,negative regulation of sequestering of calcium ion|GO:0032845,negative regulation of homeostatic process|GO:0032844,regulation of homeostatic process|GO:0006820,anion transport|GO:0006821,chloride transport|GO:0007165,signal transduction|GO:0098771,in…	GO:0034707,chloride channel complex|GO:0043229,intracellular organelle|GO:0034702,ion channel complex|GO:0043227,membrane-bounded organelle|GO:0043226,organelle|GO:0031224,intrinsic component of membrane|GO:0005737,cytoplasm|GO:0016021,integral component of membrane|GO:0016020,membrane|GO:1902495,transmembrane transporter complex|GO:1990351,transporter complex|GO:0043234,protein complex|GO:003299…	GO:0005488,binding|GO:0016491,oxidoreductase activity|GO:0004364,glutathione transferase activity|GO:0008509,anion transmembrane transporter activity|GO:0016765,transferase activity, transferring alkyl or aryl (other than methyl) groups|GO:0016740,transferase activity|GO:0015103,inorganic anion transmembrane transporter activity|GO:0022803,passive transmembrane transporter activity|GO:0016684,oxi…				http://www.uniprot.org/uniprot/O15247	False
VPS4A	0.375461	-1.41327	Q9UN37	VPS4A	GO:0044238,primary metabolic process|GO:0051046,regulation of secretion|GO:0051047,positive regulation of secretion|GO:0051049,regulation of transport|GO:1903774,positive regulation of viral budding via host ESCRT complex|GO:1903772,regulation of viral budding via host ESCRT complex|GO:0061025,membrane fusion|GO:0061024,membrane organization|GO:0007009,plasma membrane organization|GO:0008104,prot…	GO:0016020,membrane|GO:0000323,lytic vacuole|GO:0044421,extracellular region part|GO:0044464,cell part|GO:0043229,intracellular organelle|GO:0043228,non-membrane-bounded organelle|GO:0032991,macromolecular complex|GO:0005774,vacuolar membrane|GO:0043227,membrane-bounded organelle|GO:0043226,organelle|GO:0010008,endosome membrane|GO:0005856,cytoskeleton|GO:0005764,lysosome|GO:0005819,spindle|GO:00…	GO:0008022,protein C-terminus binding|GO:0035639,purine ribonucleoside triphosphate binding|GO:0005488,binding|GO:0016887,ATPase activity|GO:0043167,ion binding|GO:1901363,heterocyclic compound binding|GO:1901265,nucleoside phosphate binding|GO:0001882,nucleoside binding|GO:0043168,anion binding|GO:0042623,ATPase activity, coupled|GO:0008568,microtubule-severing ATPase activity|GO:0000166,nucleot…	hsa04144,Endocytosis|hsa04217,Necroptosis			http://www.uniprot.org/uniprot/Q9UN37	False
GAPVD1	0.327577	-1.61009	F8W9S7	GAPVD1	GO:0051336,regulation of hydrolase activity|GO:0044700,single organism signaling|GO:0051716,cellular response to stimulus|GO:0009987,cellular process|GO:0019222,regulation of metabolic process|GO:0050896,response to stimulus|GO:0050790,regulation of catalytic activity|GO:0044763,single-organism cellular process|GO:0050794,regulation of cellular process|GO:0065007,biological regulation|GO:0023052,…	GO:0005737,cytoplasm|GO:0005829,cytosol|GO:0044464,cell part|GO:0005623,cell|GO:0005622,intracellular|GO:0044444,cytoplasmic part|GO:0044424,intracellular part|GO:0016020,membrane|GO:0071944,cell periphery|GO:0005886,plasma membrane					http://www.uniprot.org/uniprot/F8W9S7	False
GSTT1	0.317214	-1.65647	P30711	GSTT1	GO:0006805,xenobiotic metabolic process|GO:0034641,cellular nitrogen compound metabolic process|GO:0006807,nitrogen compound metabolic process|GO:0044281,small molecule metabolic process|GO:0070887,cellular response to chemical stimulus|GO:1901566,organonitrogen compound biosynthetic process|GO:0044699,single-organism process|GO:1901576,organic substance biosynthetic process|GO:0044710,single-org…	GO:0005737,cytoplasm|GO:0005622,intracellular|GO:0043230,extracellular organelle|GO:0031982,vesicle|GO:0044421,extracellular region part|GO:0043227,membrane-bounded organelle|GO:0005829,cytosol|GO:0044464,cell part|GO:0005623,cell|GO:0031988,membrane-bounded vesicle|GO:0044444,cytoplasmic part|GO:0005576,extracellular region|GO:0044424,intracellular part|GO:1903561,extracellular vesicle|GO:006501…	GO:0004364,glutathione transferase activity|GO:0003824,catalytic activity|GO:0016209,antioxidant activity|GO:0016765,transferase activity, transferring alkyl or aryl (other than methyl) groups|GO:0016740,transferase activity|GO:0016684,oxidoreductase activity, acting on peroxide as acceptor|GO:0004601,peroxidase activity|GO:0004602,glutathione peroxidase activity|GO:0016491,oxidoreductase activit…	hsa00980,Metabolism of xenobiotics by cytochrome P450|hsa00983,Drug metabolism - other enzymes|hsa00982,Drug metabolism - cytochrome P450|hsa05204,Chemical carcinogenesis|hsa01100,Metabolic pathways|hsa01524,Platinum drug resistance|hsa05200,Pathways in cancer|hsa05418,Fluid shear stress and atherosclerosis|hsa05225,Hepatocellular carcinoma|hsa00480,Glutathione metabolism			http://www.uniprot.org/uniprot/P30711	False
NUTF2	0.281131	-1.83068	P61970	NUTF2	GO:0034504,protein localization to nucleus|GO:0033157,regulation of intracellular protein transport|GO:0051169,nuclear transport|GO:0051168,nuclear export|GO:0032388,positive regulation of intracellular transport|GO:0060341,regulation of cellular localization|GO:0006611,protein export from nucleus|GO:1903651,positive regulation of cytoplasmic transport|GO:0032386,regulation of intracellular trans…	GO:0016020,membrane|GO:0044421,extracellular region part|GO:0031975,envelope|GO:0042175,nuclear outer membrane-endoplasmic reticulum membrane network|GO:0043229,intracellular organelle|GO:0043227,membrane-bounded organelle|GO:0043226,organelle|GO:0031224,intrinsic component of membrane|GO:0005737,cytoplasm|GO:0046930,pore complex|GO:0031982,vesicle|GO:0005634,nucleus|GO:0005635,nuclear envelope|G…	GO:0005215,transporter activity|GO:0008536,Ran GTPase binding|GO:0019899,enzyme binding|GO:0017016,Ras GTPase binding|GO:0031267,small GTPase binding|GO:0051020,GTPase binding|GO:0005488,binding|GO:0005515,protein binding|GO:0005487,nucleocytoplasmic transporter activity|GO:0008565,protein transporter activity|GO:0022892,substrate-specific transporter activity|GO:0005198,structural molecule activ…				http://www.uniprot.org/uniprot/P61970	False
HBB	0.280017	-1.83641	P68871	HBB	GO:0007599,hemostasis|GO:0019222,regulation of metabolic process|GO:0007596,blood coagulation|GO:0006820,anion transport|GO:0003013,circulatory system process|GO:0003014,renal system process|GO:0044281,small molecule metabolic process|GO:0003018,vascular process in circulatory system|GO:0071840,cellular component organization or biogenesis|GO:0044712,single-organism catabolic process|GO:0044710,s…	GO:0031974,membrane-enclosed lumen|GO:0030139,endocytic vesicle|GO:0043229,intracellular organelle|GO:0060205,cytoplasmic membrane-bounded vesicle lumen|GO:0031988,membrane-bounded vesicle|GO:0043227,membrane-bounded organelle|GO:0043226,organelle|GO:0005737,cytoplasm|GO:0031983,vesicle lumen|GO:0070062,extracellular exosome|GO:0071682,endocytic vesicle lumen|GO:0016023,cytoplasmic, membrane-boun…	GO:0005344,oxygen transporter activity|GO:0005488,binding|GO:1901363,heterocyclic compound binding|GO:0016491,oxidoreductase activity|GO:0043169,cation binding|GO:0016684,oxidoreductase activity, acting on peroxide as acceptor|GO:0046914,transition metal ion binding|GO:0043167,ion binding|GO:0005506,iron ion binding|GO:0046872,metal ion binding|GO:0020037,heme binding|GO:0005215,transporter activ…	hsa05143,African trypanosomiasis|hsa05144,Malaria	H00020,Colorectal cancer|H00022,Bladder cancer		http://www.uniprot.org/uniprot/P68871	False
RAB35	0.268183	-1.89871	Q15286	RAB35	GO:0042221,response to chemical|GO:0032502,developmental process|GO:1990090,cellular response to nerve growth factor stimulus|GO:0008104,protein localization|GO:0030030,cell projection organization|GO:0044699,single-organism process|GO:0030154,cell differentiation|GO:0048468,cell development|GO:0048227,plasma membrane to endosome transport|GO:0023052,signaling|GO:0007165,signal transduction|GO:00…	GO:0098590,plasma membrane region|GO:0005783,endoplasmic reticulum|GO:0048770,pigment granule|GO:0005789,endoplasmic reticulum membrane|GO:0030139,endocytic vesicle|GO:0042175,nuclear outer membrane-endoplasmic reticulum membrane network|GO:0043229,intracellular organelle|GO:0071944,cell periphery|GO:0005905,clathrin-coated pit|GO:0005622,intracellular|GO:0030135,coated vesicle|GO:0043226,organel…	GO:0035639,purine ribonucleoside triphosphate binding|GO:0005488,binding|GO:0043167,ion binding|GO:1901363,heterocyclic compound binding|GO:1901265,nucleoside phosphate binding|GO:0001882,nucleoside binding|GO:0043168,anion binding|GO:0016462,pyrophosphatase activity|GO:0097367,carbohydrate derivative binding|GO:0005543,phospholipid binding|GO:0005546,phosphatidylinositol-4,5-bisphosphate binding…	hsa04144,Endocytosis			http://www.uniprot.org/uniprot/Q15286	False
XK	0.249409	-2.00342	P51811	XK	GO:0030003,cellular cation homeostasis|GO:0048468,cell development|GO:0006820,anion transport|GO:0055074,calcium ion homeostasis|GO:0098771,inorganic ion homeostasis|GO:0090066,regulation of anatomical structure size|GO:0010960,magnesium ion homeostasis|GO:0031344,regulation of cell projection organization|GO:0071840,cellular component organization or biogenesis|GO:0007517,muscle organ developmen…	GO:0016021,integral component of membrane|GO:0016020,membrane|GO:0005623,cell|GO:0044425,membrane part|GO:0031224,intrinsic component of membrane|GO:0044464,cell part|GO:0071944,cell periphery|GO:0005886,plasma membrane	GO:0005215,transporter activity|GO:0005488,binding|GO:0005515,protein binding				http://www.uniprot.org/uniprot/P51811	False
PRDX2	0.247625	-2.01377	A6NIW5	PRDX2	GO:0008152,metabolic process|GO:0044710,single-organism metabolic process|GO:0044699,single-organism process|GO:0055114,oxidation-reduction process|GO:0000305,response to oxygen radical|GO:0000303,response to superoxide|GO:0000302,response to reactive oxygen species|GO:0042592,homeostatic process|GO:0006801,superoxide metabolic process|GO:0070887,cellular response to chemical stimulus|GO:0098754,…	GO:0005623,cell	GO:0003824,catalytic activity|GO:0016209,antioxidant activity|GO:0016491,oxidoreductase activity|GO:0051920,peroxiredoxin activity|GO:0008379,thioredoxin peroxidase activity|GO:0016684,oxidoreductase activity, acting on peroxide as acceptor|GO:0004601,peroxidase activity				http://www.uniprot.org/uniprot/A6NIW5	False
CRLF3	0.231592	-2.11034	Q8IUI8	CRLF3	GO:0080090,regulation of primary metabolic process|GO:0019222,regulation of metabolic process|GO:0048584,positive regulation of response to stimulus|GO:0048583,regulation of response to stimulus|GO:0007165,signal transduction|GO:1901576,organic substance biosynthetic process|GO:1901362,organic cyclic compound biosynthetic process|GO:0071840,cellular component organization or biogenesis|GO:0051716…	GO:0005737,cytoplasm|GO:0016020,membrane|GO:0044464,cell part|GO:0005623,cell|GO:0005622,intracellular|GO:0071944,cell periphery|GO:0005886,plasma membrane|GO:0044424,intracellular part|GO:0005829,cytosol|GO:0044444,cytoplasmic part|GO:0043231,intracellular membrane-bounded organelle|GO:0005634,nucleus|GO:0043229,intracellular organelle|GO:0043226,organelle|GO:0043227,membrane-bounded organelle	GO:0005488,binding|GO:0005515,protein binding|GO:0042802,identical protein binding|GO:0003676,nucleic acid binding|GO:0097159,organic cyclic compound binding|GO:0003677,DNA binding|GO:1901363,heterocyclic compound binding				http://www.uniprot.org/uniprot/Q8IUI8	False
CA1	0.212628	-2.2336	P00915	CA1	GO:0044710,single-organism metabolic process|GO:0006810,transport|GO:0044699,single-organism process|GO:0006730,one-carbon metabolic process|GO:0009987,cellular process|GO:0015701,bicarbonate transport|GO:0044237,cellular metabolic process|GO:0015711,organic anion transport|GO:0044765,single-organism transport|GO:0006820,anion transport|GO:0044763,single-organism cellular process|GO:0044281,small…	GO:0005737,cytoplasm|GO:0005622,intracellular|GO:0043230,extracellular organelle|GO:0031982,vesicle|GO:0044421,extracellular region part|GO:0043227,membrane-bounded organelle|GO:0005829,cytosol|GO:0044464,cell part|GO:0005623,cell|GO:0031988,membrane-bounded vesicle|GO:0044444,cytoplasmic part|GO:0005576,extracellular region|GO:0044424,intracellular part|GO:1903561,extracellular vesicle|GO:006501…	GO:0005488,binding|GO:0016787,hydrolase activity|GO:0046872,metal ion binding|GO:0046914,transition metal ion binding|GO:0043169,cation binding|GO:0016835,carbon-oxygen lyase activity|GO:0016836,hydro-lyase activity|GO:0052689,carboxylic ester hydrolase activity|GO:0043167,ion binding|GO:0003824,catalytic activity|GO:0016788,hydrolase activity, acting on ester bonds|GO:0005515,protein binding|GO:…	hsa01100,Metabolic pathways|hsa00910,Nitrogen metabolism		D00218,Acetazolamide (JP16/USP/INN); Diamox (TN)|D00518,Diclofenamide (JP16/INN); Dichlorphenamide (USP); Daranide (TN)|D00652,Brinzolamide (JAN/USP/INN); Azopt (TN)|D00653,Dorzolamide hydrochloride (JP16/USP); Trusopt (TN)|D00655,Methazolamide (JAN/USP/INN); Neptazane (TN)|D01196,Acetazolamide sodium (JAN); Diamox (TN)|D01822,Clofenamide (JAN/INN)|D02441,Ethoxzolamide; Cardrase (TN)|D03845,Sezol…	http://www.uniprot.org/uniprot/P00915	False
PCBD2	0.165565	-2.59453	Q9H0N5	PCBD2	GO:0080090,regulation of primary metabolic process|GO:0019222,regulation of metabolic process|GO:0051289,protein homotetramerization|GO:2000112,regulation of cellular macromolecule biosynthetic process|GO:0042558,pteridine-containing compound metabolic process|GO:1901362,organic cyclic compound biosynthetic process|GO:1901360,organic cyclic compound metabolic process|GO:0044710,single-organism me…	GO:0005737,cytoplasm|GO:0043231,intracellular membrane-bounded organelle|GO:0005634,nucleus|GO:0044464,cell part|GO:0044444,cytoplasmic part|GO:0005739,mitochondrion|GO:0005622,intracellular|GO:0043229,intracellular organelle|GO:0005623,cell|GO:0044424,intracellular part|GO:0043227,membrane-bounded organelle|GO:0043226,organelle	GO:0004505,phenylalanine 4-monooxygenase activity|GO:0008124,4-alpha-hydroxytetrahydrobiopterin dehydratase activity|GO:0016836,hydro-lyase activity|GO:0016705,oxidoreductase activity, acting on paired donors, with incorporation or reduction of molecular oxygen|GO:0004497,monooxygenase activity|GO:0003824,catalytic activity|GO:0005488,binding|GO:0005515,protein binding|GO:0016714,oxidoreductase a…	hsa01100,Metabolic pathways|hsa00790,Folate biosynthesis			http://www.uniprot.org/uniprot/Q9H0N5	False
AP2M1	0.139237	-2.84438	Q96CW1	AP2M1	GO:0002495,antigen processing and presentation of peptide antigen via MHC class II|GO:0008104,protein localization|GO:0050688,regulation of defense response to virus|GO:0048585,negative regulation of response to stimulus|GO:0048583,regulation of response to stimulus|GO:0061024,membrane organization|GO:0007009,plasma membrane organization|GO:0007165,signal transduction|GO:0007166,cell surface rece…	GO:0098796,membrane protein complex|GO:0000323,lytic vacuole|GO:0044464,cell part|GO:0030139,endocytic vesicle|GO:0043229,intracellular organelle|GO:0071944,cell periphery|GO:0030117,membrane coat|GO:0005905,clathrin-coated pit|GO:0005773,vacuole|GO:0030131,clathrin adaptor complex|GO:0030119,AP-type membrane coat adaptor complex|GO:0005774,vacuolar membrane|GO:0030135,coated vesicle|GO:0043226,o…	GO:0030674,protein binding, bridging|GO:0042277,peptide binding|GO:0005048,signal sequence binding|GO:0005215,transporter activity|GO:0008289,lipid binding|GO:0070325,lipoprotein particle receptor binding|GO:0098748,endocytic adaptor activity|GO:0005488,binding|GO:0005515,protein binding|GO:0033218,amide binding|GO:0030276,clathrin binding|GO:0005102,receptor binding|GO:0050750,low-density lipopr…	hsa04721,Synaptic vesicle cycle|hsa05016,Huntington's disease|hsa04961,Endocrine and other factor-regulated calcium reabsorption|hsa04144,Endocytosis			http://www.uniprot.org/uniprot/Q96CW1	False
HBG1	0.100059	-3.32107	P69891	HBG1	GO:0051234,establishment of localization|GO:0044699,single-organism process|GO:0032501,multicellular organismal process|GO:0007599,hemostasis|GO:0044707,single-multicellular organism process|GO:0050878,regulation of body fluid levels|GO:0006950,response to stress|GO:0050896,response to stimulus|GO:0007596,blood coagulation|GO:0009611,response to wounding|GO:0042060,wound healing|GO:0015669,gas tr…	GO:0043234,protein complex|GO:0005737,cytoplasm|GO:0032991,macromolecular complex|GO:0005829,cytosol|GO:0044464,cell part|GO:0005623,cell|GO:0005833,hemoglobin complex|GO:0044444,cytoplasmic part|GO:0044445,cytosolic part|GO:0044424,intracellular part|GO:0005622,intracellular|GO:0031838,haptoglobin-hemoglobin complex	GO:0043169,cation binding|GO:0005344,oxygen transporter activity|GO:0022892,substrate-specific transporter activity|GO:0046914,transition metal ion binding|GO:0020037,heme binding|GO:0046906,tetrapyrrole binding|GO:0005215,transporter activity|GO:0043167,ion binding|GO:0019825,oxygen binding|GO:0005488,binding|GO:0097159,organic cyclic compound binding|GO:0005506,iron ion binding|GO:0046872,metal…				http://www.uniprot.org/uniprot/P69891	False
EHBP1L1	0.0927104	-3.43112	Q8N3D4	EHBP1L1	GO:0006996,organelle organization|GO:0007010,cytoskeleton organization|GO:0030029,actin filament-based process|GO:0009987,cellular process|GO:0016043,cellular component organization|GO:0030036,actin cytoskeleton organization|GO:0071840,cellular component organization or biogenesis	GO:0016020,membrane|GO:0005768,endosome|GO:0005737,cytoplasm|GO:0031982,vesicle|GO:0031410,cytoplasmic vesicle|GO:0044464,cell part|GO:0005623,cell|GO:0005622,intracellular|GO:0044444,cytoplasmic part|GO:0097708,intracellular vesicle|GO:0044424,intracellular part|GO:0043227,membrane-bounded organelle|GO:0043226,organelle|GO:0012505,endomembrane system|GO:0043229,intracellular organelle|GO:0099512…					http://www.uniprot.org/uniprot/Q8N3D4	False
GYPA	0.0781724	-3.6772	P02724	GYPA	GO:0046718,viral entry into host cell|GO:0040011,locomotion|GO:0009987,cellular process|GO:0052192,movement in environment of other organism involved in symbiotic interaction|GO:0044764,multi-organism cellular process|GO:0044419,interspecies interaction between organisms|GO:0030260,entry into host cell|GO:0051828,entry into other organism involved in symbiotic interaction|GO:0019058,viral life cy…	GO:0043230,extracellular organelle|GO:0031982,vesicle|GO:0044421,extracellular region part|GO:0043227,membrane-bounded organelle|GO:0016021,integral component of membrane|GO:0016020,membrane|GO:0044464,cell part|GO:0005623,cell|GO:0031988,membrane-bounded vesicle|GO:0071944,cell periphery|GO:0005576,extracellular region|GO:0005886,plasma membrane|GO:0044425,membrane part|GO:1903561,extracellular …	GO:0001618,virus receptor activity|GO:0060089,molecular transducer activity|GO:0005488,binding|GO:0005515,protein binding|GO:0042802,identical protein binding|GO:0004872,receptor activity|GO:0140272,exogenous protein binding|GO:0104005,hijacked molecular function	hsa05144,Malaria|hsa04640,Hematopoietic cell lineage			http://www.uniprot.org/uniprot/P02724	False
VAPA	0.0483829	-4.36936	Q9P0L0	VAPA	GO:0008104,protein localization|GO:0048584,positive regulation of response to stimulus|GO:0048583,regulation of response to stimulus|GO:0006900,membrane budding|GO:0061025,membrane fusion|GO:0061024,membrane organization|GO:0007165,signal transduction|GO:1901576,organic substance biosynthetic process|GO:0071840,cellular component organization or biogenesis|GO:0044710,single-organism metabolic pro…	GO:0005783,endoplasmic reticulum|GO:0005789,endoplasmic reticulum membrane|GO:0042175,nuclear outer membrane-endoplasmic reticulum membrane network|GO:0043229,intracellular organelle|GO:0043228,non-membrane-bounded organelle|GO:0005622,intracellular|GO:0043227,membrane-bounded organelle|GO:0005923,bicellular tight junction|GO:0030054,cell junction|GO:0070971,endoplasmic reticulum exit site|GO:003…	GO:0015631,tubulin binding|GO:0005515,protein binding|GO:0008092,cytoskeletal protein binding|GO:0008017,microtubule binding|GO:0033149,FFAT motif binding|GO:0060089,molecular transducer activity|GO:0044877,macromolecular complex binding|GO:0019904,protein domain specific binding|GO:0004871,signal transducer activity|GO:0032403,protein complex binding|GO:0046983,protein dimerization activity|GO:0…	hsa04979,Cholesterol metabolism			http://www.uniprot.org/uniprot/Q9P0L0	False
CSNK2A1	0.0207222	-5.59268	P68400	CSNK2A1	GO:0080090,regulation of primary metabolic process|GO:0032434,regulation of proteasomal ubiquitin-dependent protein catabolic process|GO:0032435,negative regulation of proteasomal ubiquitin-dependent protein catabolic process|GO:0048584,positive regulation of response to stimulus|GO:0048583,regulation of response to stimulus|GO:0044257,cellular protein catabolic process|GO:0030111,regulation of W…	GO:0031974,membrane-enclosed lumen|GO:0043229,intracellular organelle|GO:0043228,non-membrane-bounded organelle|GO:0000785,chromatin|GO:0000228,nuclear chromosome|GO:0043227,membrane-bounded organelle|GO:0043226,organelle|GO:0005737,cytoplasm|GO:0070822,Sin3-type complex|GO:0070603,SWI/SNF superfamily-type complex|GO:0031519,PcG protein complex|GO:0031981,nuclear lumen|GO:0005634,nucleus|GO:00160…	GO:0035639,purine ribonucleoside triphosphate binding|GO:0031072,heat shock protein binding|GO:0004672,protein kinase activity|GO:0043167,ion binding|GO:1901363,heterocyclic compound binding|GO:0001883,purine nucleoside binding|GO:0001882,nucleoside binding|GO:0043168,anion binding|GO:0000166,nucleotide binding|GO:0004674,protein serine/threonine kinase activity|GO:0016740,transferase activity|GO…	hsa03008,Ribosome biogenesis in eukaryotes|hsa05235,unkown|hsa04137,unkown|hsa04520,Adherens junction|hsa04064,NF-kappa B signaling pathway|hsa04310,Wnt signaling pathway|hsa05162,Measles			http://www.uniprot.org/uniprot/P68400	False
MAPK1IP1L	0.0114888	-6.44363	Q8NDC0	MAPK1IP1L			GO:0005488,binding|GO:0005515,protein binding				http://www.uniprot.org/uniprot/Q8NDC0	False

## Sheet: Sheet1
ID	FoldChange	Log2FoldChange	Uniprot	Genename	Biological Process	Cell Component	Molecular Function	KEGG Pathways	Disease	Drug	UNIPROT_URL	Transcription Factor
SUGT1	198.337	7.63181	Q9Y2Z0	SUGT1	GO:0009893,positive regulation of metabolic process|GO:0019222,regulation of metabolic process|GO:0006955,immune response|GO:1903047,mitotic cell cycle process|GO:0023052,signaling|GO:0007165,signal transduction|GO:0051702,interaction with symbiont|GO:0052203,modulation of catalytic activity in other organism involved in symbiotic interaction|GO:0007067,mitotic nuclear division|GO:0050789,regulat…	GO:0043229,intracellular organelle|GO:0043228,non-membrane-bounded organelle|GO:0043227,membrane-bounded organelle|GO:0043226,organelle|GO:0005737,cytoplasm|GO:0005634,nucleus|GO:0098687,chromosomal region|GO:0005694,chromosome|GO:1902494,catalytic complex|GO:1990234,transferase complex|GO:0000775,chromosome, centromeric region|GO:0000776,kinetochore|GO:0043234,protein complex|GO:0032991,macromol…	GO:0005488,binding|GO:0005515,protein binding	hsa04621,NOD-like receptor signaling pathway			http://www.uniprot.org/uniprot/Q9Y2Z0	False
PRSS1	100.329	6.64859	P07477	PRSS1	GO:0009235,cobalamin metabolic process|GO:0006766,vitamin metabolic process|GO:0006807,nitrogen compound metabolic process|GO:0044281,small molecule metabolic process|GO:0071840,cellular component organization or biogenesis|GO:0044710,single-organism metabolic process|GO:1901360,organic cyclic compound metabolic process|GO:0016043,cellular component organization|GO:0071704,organic substance metab…	GO:0043230,extracellular organelle|GO:0031982,vesicle|GO:0044421,extracellular region part|GO:0043227,membrane-bounded organelle|GO:0072562,blood microparticle|GO:0031988,membrane-bounded vesicle|GO:0005576,extracellular region|GO:0005615,extracellular space|GO:1903561,extracellular vesicle|GO:0065010,extracellular membrane-bounded organelle|GO:0043226,organelle|GO:0070062,extracellular exosome|G…	GO:0004252,serine-type endopeptidase activity|GO:0004175,endopeptidase activity|GO:0017171,serine hydrolase activity|GO:0016787,hydrolase activity|GO:0043169,cation binding|GO:0043167,ion binding|GO:0003824,catalytic activity|GO:0070011,peptidase activity, acting on L-amino acid peptides|GO:0005488,binding|GO:0008233,peptidase activity|GO:0046872,metal ion binding|GO:0008236,serine-type peptidase…	hsa05164,Influenza A|hsa04974,Protein digestion and absorption|hsa04972,Pancreatic secretion|hsa04080,Neuroactive ligand-receptor interaction		D05183,Ulinastatin (JP16); Miraclid (TN)	http://www.uniprot.org/uniprot/P07477	False
SRXN1	45.0533	5.49356	Q9BYN0	SRXN1	GO:0044710,single-organism metabolic process|GO:0050896,response to stimulus|GO:0006950,response to stress|GO:0055114,oxidation-reduction process|GO:0008152,metabolic process|GO:0006979,response to oxidative stress|GO:0044699,single-organism process|GO:0070887,cellular response to chemical stimulus|GO:0009987,cellular process|GO:0009636,response to toxic substance|GO:0051716,cellular response to …	GO:0005737,cytoplasm|GO:0005829,cytosol|GO:0044464,cell part|GO:0005623,cell|GO:0005622,intracellular|GO:0044444,cytoplasmic part|GO:0044424,intracellular part	GO:0035639,purine ribonucleoside triphosphate binding|GO:0005488,binding|GO:0000166,nucleotide binding|GO:1901363,heterocyclic compound binding|GO:1901265,nucleoside phosphate binding|GO:0001882,nucleoside binding|GO:0043168,anion binding|GO:0043167,ion binding|GO:0001883,purine nucleoside binding|GO:0016667,oxidoreductase activity, acting on a sulfur group of donors|GO:0032549,ribonucleoside bin…				http://www.uniprot.org/uniprot/Q9BYN0	False
TANC2	36.0324	5.17122	Q9HCD6	TANC2	GO:0032502,developmental process|GO:0001701,in utero embryonic development|GO:0044707,single-multicellular organism process|GO:0032501,multicellular organismal process|GO:0048856,anatomical structure development|GO:0044767,single-organism developmental process|GO:0009790,embryo development|GO:0009792,embryo development ending in birth or egg hatching|GO:0043009,chordate embryonic development|GO:0…	GO:0043228,non-membrane-bounded organelle|GO:0005623,cell|GO:0044464,cell part|GO:0099572,postsynaptic specialization|GO:0032279,asymmetric synapse|GO:0097458,neuron part|GO:0098794,postsynapse|GO:0014069,postsynaptic density|GO:0099092,postsynaptic density, intracellular component|GO:0099091,postsynaptic specialization, intracellular component|GO:0044456,synapse part|GO:0098984,neuron to neuron …					http://www.uniprot.org/uniprot/Q9HCD6	False
PPP6R1	35.0206	5.13013	Q9UPN7	PPP6R1	GO:0019220,regulation of phosphate metabolic process|GO:0080090,regulation of primary metabolic process|GO:0019222,regulation of metabolic process|GO:0016311,dephosphorylation|GO:0010921,regulation of phosphatase activity|GO:0031323,regulation of cellular metabolic process|GO:0031399,regulation of protein modification process|GO:0050789,regulation of biological process|GO:0044267,cellular protein…	GO:0005737,cytoplasm|GO:0044464,cell part|GO:0005623,cell|GO:0005622,intracellular|GO:0044424,intracellular part|GO:0043229,intracellular organelle|GO:0043227,membrane-bounded organelle|GO:0043226,organelle|GO:0031984,organelle subcompartment|GO:0031090,organelle membrane|GO:0016020,membrane|GO:0044431,Golgi apparatus part|GO:0005794,Golgi apparatus|GO:0098588,bounding membrane of organelle|GO:00…	GO:0019899,enzyme binding|GO:0019903,protein phosphatase binding|GO:0019902,phosphatase binding|GO:0005488,binding|GO:0005515,protein binding|GO:0031267,small GTPase binding|GO:0051020,GTPase binding|GO:0017048,Rho GTPase binding|GO:0017016,Ras GTPase binding				http://www.uniprot.org/uniprot/Q9UPN7	False
HGS	15.9791	3.99811	O14964	HGS	GO:0006887,exocytosis|GO:0019220,regulation of phosphate metabolic process|GO:0080090,regulation of primary metabolic process|GO:0019222,regulation of metabolic process|GO:0051047,positive regulation of secretion|GO:0051049,regulation of transport|GO:0048585,negative regulation of response to stimulus|GO:0048583,regulation of response to stimulus|GO:0061024,membrane organization|GO:0008104,protei…	GO:0016020,membrane|GO:0044421,extracellular region part|GO:0043229,intracellular organelle|GO:0043227,membrane-bounded organelle|GO:0043226,organelle|GO:0010008,endosome membrane|GO:0005737,cytoplasm|GO:0070062,extracellular exosome|GO:0016023,cytoplasmic, membrane-bounded vesicle|GO:0031410,cytoplasmic vesicle|GO:0005771,multivesicular body|GO:0005770,late endosome|GO:0031988,membrane-bounded v…	GO:0043169,cation binding|GO:0043167,ion binding|GO:0005488,binding|GO:0005515,protein binding|GO:0046872,metal ion binding|GO:0019904,protein domain specific binding|GO:0044389,ubiquitin-like protein ligase binding|GO:0019899,enzyme binding	hsa04145,Phagosome|hsa04144,Endocytosis			http://www.uniprot.org/uniprot/O14964	False
HPS1	14.924	3.89957	Q92902	HPS1	GO:0006996,organelle organization|GO:0007033,vacuole organization|GO:0032501,multicellular organismal process|GO:0044707,single-multicellular organism process|GO:0050877,neurological system process|GO:0071840,cellular component organization or biogenesis|GO:0009987,cellular process|GO:0007601,visual perception|GO:0007600,sensory perception|GO:0050953,sensory perception of light stimulus|GO:008017…	GO:0000323,lytic vacuole|GO:0043229,intracellular organelle|GO:0071944,cell periphery|GO:0031226,intrinsic component of plasma membrane|GO:0043226,organelle|GO:0031224,intrinsic component of membrane|GO:0005737,cytoplasm|GO:0031982,vesicle|GO:0016023,cytoplasmic, membrane-bounded vesicle|GO:0031410,cytoplasmic vesicle|GO:0016021,integral component of membrane|GO:0016020,membrane|GO:0044444,cytopl…	GO:0046983,protein dimerization activity|GO:0005488,binding|GO:0005515,protein binding|GO:0005085,guanyl-nucleotide exchange factor activity|GO:0098772,molecular function regulator|GO:0019899,enzyme binding|GO:0051020,GTPase binding				http://www.uniprot.org/uniprot/Q92902	False
KRT10	9.12168	3.1893	P13645	KRT10	GO:0071248,cellular response to metal ion|GO:0030154,cell differentiation|GO:0071241,cellular response to inorganic substance|GO:0070887,cellular response to chemical stimulus|GO:0008544,epidermis development|GO:0007275,multicellular organism development|GO:0044699,single-organism process|GO:0051716,cellular response to stimulus|GO:0048869,cellular developmental process|GO:0048513,animal organ de…	GO:0045095,keratin filament|GO:0043229,intracellular organelle|GO:0043228,non-membrane-bounded organelle|GO:0043227,membrane-bounded organelle|GO:0043226,organelle|GO:0005856,cytoskeleton|GO:0045111,intermediate filament cytoskeleton|GO:0031982,vesicle|GO:0005615,extracellular space|GO:0005634,nucleus|GO:0016020,membrane|GO:0031988,membrane-bounded vesicle|GO:0044430,cytoskeletal part|GO:0005737,…	GO:0005198,structural molecule activity|GO:0030280,structural constituent of epidermis|GO:0046983,protein dimerization activity|GO:0046982,protein heterodimerization activity|GO:0005488,binding|GO:0005515,protein binding	hsa05150,Staphylococcus aureus infection|hsa04915,Estrogen signaling pathway			http://www.uniprot.org/uniprot/P13645	False
HIST1H2BK	8.52905	3.09238	O60814	HIST1H2BK	GO:0034728,nucleosome organization|GO:0071103,DNA conformation change|GO:0022607,cellular component assembly|GO:0019730,antimicrobial humoral response|GO:0070271,protein complex biogenesis|GO:0043933,macromolecular complex subunit organization|GO:0016043,cellular component organization|GO:0031497,chromatin assembly|GO:0034622,cellular macromolecular complex assembly|GO:0071840,cellular component …	GO:0031974,membrane-enclosed lumen|GO:0044815,DNA packaging complex|GO:0043229,intracellular organelle|GO:0043228,non-membrane-bounded organelle|GO:0000785,chromatin|GO:0000786,nucleosome|GO:0000788,nuclear nucleosome|GO:0000228,nuclear chromosome|GO:0043227,membrane-bounded organelle|GO:0043226,organelle|GO:0005615,extracellular space|GO:0031981,nuclear lumen|GO:0005634,nucleus|GO:0005654,nucleo…	GO:0003676,nucleic acid binding|GO:0097159,organic cyclic compound binding|GO:0005488,binding|GO:0005515,protein binding|GO:0003677,DNA binding|GO:0046983,protein dimerization activity|GO:0046982,protein heterodimerization activity|GO:1901363,heterocyclic compound binding	hsa05322,Systemic lupus erythematosus|hsa05203,Viral carcinogenesis|hsa05034,Alcoholism			http://www.uniprot.org/uniprot/O60814	False
ANXA7	6.23994	2.64153	P20073	ANXA7	GO:0022604,regulation of cell morphogenesis|GO:0009992,cellular water homeostasis|GO:0009628,response to abiotic stimulus|GO:0009892,negative regulation of metabolic process|GO:0008152,metabolic process|GO:0019222,regulation of metabolic process|GO:0022603,regulation of anatomical structure morphogenesis|GO:0050801,ion homeostasis|GO:0030154,cell differentiation|GO:0007610,behavior|GO:0051128,reg…	GO:0016020,membrane|GO:0005783,endoplasmic reticulum|GO:0044421,extracellular region part|GO:0005789,endoplasmic reticulum membrane|GO:0042175,nuclear outer membrane-endoplasmic reticulum membrane network|GO:0043229,intracellular organelle|GO:0071944,cell periphery|GO:0043227,membrane-bounded organelle|GO:0043226,organelle|GO:0005737,cytoplasm|GO:0030667,secretory granule membrane|GO:0070062,extr…	GO:0048306,calcium-dependent protein binding|GO:0005488,binding|GO:0003676,nucleic acid binding|GO:1901363,heterocyclic compound binding|GO:0043168,anion binding|GO:0043169,cation binding|GO:0005543,phospholipid binding|GO:0005544,calcium-dependent phospholipid binding|GO:0043167,ion binding|GO:0005509,calcium ion binding|GO:0032403,protein complex binding|GO:0046872,metal ion binding|GO:0005178,…				http://www.uniprot.org/uniprot/P20073	False
YWHAQ	5.55873	2.47476	P27348	YWHAQ	GO:2001235,positive regulation of apoptotic signaling pathway|GO:0008104,protein localization|GO:0032388,positive regulation of intracellular transport|GO:0080090,regulation of primary metabolic process|GO:0019222,regulation of metabolic process|GO:2001233,regulation of apoptotic signaling pathway|GO:0051049,regulation of transport|GO:0032386,regulation of intracellular transport|GO:0048584,posit…	GO:0043229,intracellular organelle|GO:0005924,cell-substrate adherens junction|GO:0005925,focal adhesion|GO:0043227,membrane-bounded organelle|GO:0043226,organelle|GO:0030054,cell junction|GO:0030055,cell-substrate junction|GO:0005737,cytoplasm|GO:0070062,extracellular exosome|GO:0016023,cytoplasmic, membrane-bounded vesicle|GO:0031410,cytoplasmic vesicle|GO:0016020,membrane|GO:0031988,membrane-b…	GO:0008022,protein C-terminus binding|GO:0047485,protein N-terminus binding|GO:0071889,14-3-3 protein binding|GO:0019904,protein domain specific binding|GO:0005515,protein binding|GO:0044325,ion channel binding|GO:0005488,binding|GO:0042802,identical protein binding	hsa04110,Cell cycle|hsa04114,Oocyte meiosis|hsa04390,Hippo signaling pathway|hsa05203,Viral carcinogenesis|hsa05160,Hepatitis C|hsa05161,Hepatitis B|hsa04151,PI3K-Akt signaling pathway			http://www.uniprot.org/uniprot/P27348	False
HIST1H4A	5.05329	2.33722	P62805	HIST1H4D	GO:0080090,regulation of primary metabolic process|GO:0019222,regulation of metabolic process|GO:0060249,anatomical structure homeostasis|GO:0048534,hematopoietic or lymphoid organ development|GO:0031055,chromatin remodeling at centromere|GO:0007165,signal transduction|GO:1901362,organic cyclic compound biosynthetic process|GO:0035574,histone H4-K20 demethylation|GO:0006306,DNA methylation|GO:004…	GO:0031974,membrane-enclosed lumen|GO:0044815,DNA packaging complex|GO:0043229,intracellular organelle|GO:0043228,non-membrane-bounded organelle|GO:0000785,chromatin|GO:0000786,nucleosome|GO:0000228,nuclear chromosome|GO:0043227,membrane-bounded organelle|GO:0043226,organelle|GO:0070062,extracellular exosome|GO:0031981,nuclear lumen|GO:0005634,nucleus|GO:0016020,membrane|GO:0031988,membrane-bound…	GO:0005488,binding|GO:0042393,histone binding|GO:0005515,protein binding|GO:0003824,catalytic activity|GO:0097159,organic cyclic compound binding|GO:0044822,poly(A) RNA binding|GO:0032451,demethylase activity|GO:0032452,histone demethylase activity|GO:0003723,RNA binding|GO:0003676,nucleic acid binding|GO:0003677,DNA binding|GO:0046983,protein dimerization activity|GO:0046982,protein heterodimeri…	hsa05322,Systemic lupus erythematosus|hsa05203,Viral carcinogenesis|hsa05034,Alcoholism			http://www.uniprot.org/uniprot/P62805	False
UFM1	5.01333	2.32577	P61960	UFM1	GO:0048583,regulation of response to stimulus|GO:1990592,protein K69-linked ufmylation|GO:0023052,signaling|GO:0007165,signal transduction|GO:0023051,regulation of signaling|GO:0010646,regulation of cell communication|GO:0050789,regulation of biological process|GO:0044699,single-organism process|GO:0044267,cellular protein metabolic process|GO:0051716,cellular response to stimulus|GO:0030522,intr…	GO:0043231,intracellular membrane-bounded organelle|GO:0005737,cytoplasm|GO:0005622,intracellular|GO:0043230,extracellular organelle|GO:0031982,vesicle|GO:0044421,extracellular region part|GO:0043227,membrane-bounded organelle|GO:0005634,nucleus|GO:0044464,cell part|GO:0005623,cell|GO:0031988,membrane-bounded vesicle|GO:0043229,intracellular organelle|GO:0005576,extracellular region|GO:0044424,in…	GO:0005488,binding|GO:0005515,protein binding				http://www.uniprot.org/uniprot/P61960	False
PPCS	4.54822	2.1853	Q9HAB8	PPCS	GO:1901566,organonitrogen compound biosynthetic process|GO:0055086,nucleobase-containing small molecule metabolic process|GO:0015936,coenzyme A metabolic process|GO:0015937,coenzyme A biosynthetic process|GO:0006732,coenzyme metabolic process|GO:0015939,pantothenate metabolic process|GO:0044249,cellular biosynthetic process|GO:0034641,cellular nitrogen compound metabolic process|GO:0009165,nucleo…	GO:0005737,cytoplasm|GO:0005622,intracellular|GO:0043230,extracellular organelle|GO:0031982,vesicle|GO:0044421,extracellular region part|GO:0043227,membrane-bounded organelle|GO:0005829,cytosol|GO:0044464,cell part|GO:0005623,cell|GO:0031988,membrane-bounded vesicle|GO:0044444,cytoplasmic part|GO:0005576,extracellular region|GO:0044424,intracellular part|GO:1903561,extracellular vesicle|GO:006501…	GO:0003824,catalytic activity|GO:0016881,acid-amino acid ligase activity|GO:0016879,ligase activity, forming carbon-nitrogen bonds|GO:0004632,phosphopantothenate--cysteine ligase activity|GO:0016874,ligase activity|GO:0005488,binding|GO:0005515,protein binding|GO:0046983,protein dimerization activity|GO:0042802,identical protein binding|GO:0042803,protein homodimerization activity|GO:0035639,puri…	hsa01100,Metabolic pathways|hsa00770,Pantothenate and CoA biosynthesis			http://www.uniprot.org/uniprot/Q9HAB8	False
CROCC2	4.41937	2.14384	H7BZ55	CROCC2							http://www.uniprot.org/uniprot/H7BZ55	False
RAD23B	3.06942	1.61797	P54727	RAD23B	GO:0009894,regulation of catabolic process|GO:0044238,primary metabolic process|GO:0080090,regulation of primary metabolic process|GO:0031329,regulation of cellular catabolic process|GO:0006950,response to stress|GO:0031323,regulation of cellular metabolic process|GO:0019953,sexual reproduction|GO:0090304,nucleic acid metabolic process|GO:0042176,regulation of protein catabolic process|GO:0006807…	GO:0031974,membrane-enclosed lumen|GO:0043229,intracellular organelle|GO:0071942,XPC complex|GO:0000109,nucleotide-excision repair complex|GO:0043227,membrane-bounded organelle|GO:0043226,organelle|GO:0005737,cytoplasm|GO:0031981,nuclear lumen|GO:0005634,nucleus|GO:0005654,nucleoplasm|GO:0000502,proteasome complex|GO:0043234,protein complex|GO:0032991,macromolecular complex|GO:0043231,intracellul…	GO:0043566,structure-specific DNA binding|GO:0005515,protein binding|GO:0003684,damaged DNA binding|GO:0097159,organic cyclic compound binding|GO:0031593,polyubiquitin binding|GO:0032182,ubiquitin-like protein binding|GO:0003697,single-stranded DNA binding|GO:0043130,ubiquitin binding|GO:0005488,binding|GO:0003676,nucleic acid binding|GO:0003677,DNA binding|GO:1901363,heterocyclic compound bindin…	hsa04141,Protein processing in endoplasmic reticulum|hsa03420,Nucleotide excision repair			http://www.uniprot.org/uniprot/P54727	False
HSP90AA1	2.67178	1.4178	P07900	HSP90AA1	GO:0008104,protein localization|GO:0006909,phagocytosis|GO:0019222,regulation of metabolic process|GO:0000086,G2/M transition of mitotic cell cycle|GO:0034605,cellular response to heat|GO:0048584,positive regulation of response to stimulus|GO:0048583,regulation of response to stimulus|GO:0009408,response to heat|GO:0061024,membrane organization|GO:0007008,outer mitochondrial membrane organization…	GO:0098590,plasma membrane region|GO:0044421,extracellular region part|GO:0048770,pigment granule|GO:0031974,membrane-enclosed lumen|GO:0030139,endocytic vesicle|GO:0043229,intracellular organelle|GO:0071944,cell periphery|GO:0060205,cytoplasmic membrane-bounded vesicle lumen|GO:0005622,intracellular|GO:0043227,membrane-bounded organelle|GO:0043226,organelle|GO:0005737,cytoplasm|GO:0044433,cytopl…	GO:0016887,ATPase activity|GO:0035639,purine ribonucleoside triphosphate binding|GO:0019899,enzyme binding|GO:0051020,GTPase binding|GO:0044877,macromolecular complex binding|GO:0005488,binding|GO:0003676,nucleic acid binding|GO:0098772,molecular function regulator|GO:1901363,heterocyclic compound binding|GO:0001883,purine nucleoside binding|GO:0001882,nucleoside binding|GO:0043168,anion binding|…	hsa04659,Th17 cell differentiation|hsa05418,Fluid shear stress and atherosclerosis|hsa04612,Antigen processing and presentation|hsa04621,NOD-like receptor signaling pathway|hsa04657,IL-17 signaling pathway|hsa05200,Pathways in cancer|hsa04141,Protein processing in endoplasmic reticulum|hsa04914,Progesterone-mediated oocyte maturation|hsa04915,Estrogen signaling pathway|hsa05215,Prostate cancer|hs…		D09375,Retaspimycin (USAN/INN)|D09376,Retaspimycin hydrochloride (USAN)|D10126,Ganetespib (USAN)|D10646,Luminespib (USAN/INN)|D10647,Luminespib mesylate (USAN)|D10719,Onalespib (USAN/INN)	http://www.uniprot.org/uniprot/P07900	False
SH3BGRL2	2.54097	1.34538	Q9UJC5	SH3BGRL2		GO:0031974,membrane-enclosed lumen|GO:0043229,intracellular organelle|GO:0043227,membrane-bounded organelle|GO:0043226,organelle|GO:0070062,extracellular exosome|GO:0031981,nuclear lumen|GO:0005634,nucleus|GO:0031988,membrane-bounded vesicle|GO:0005654,nucleoplasm|GO:1903561,extracellular vesicle|GO:0031982,vesicle|GO:0043230,extracellular organelle|GO:0043231,intracellular membrane-bounded organ…	GO:0005488,binding|GO:0017124,SH3 domain binding|GO:0005515,protein binding|GO:0019904,protein domain specific binding				http://www.uniprot.org/uniprot/Q9UJC5	False
HBA1	2.39151	1.25792	P69905	HBA2	GO:0015701,bicarbonate transport|GO:0022607,cellular component assembly|GO:0070271,protein complex biogenesis|GO:0043933,macromolecular complex subunit organization|GO:0000302,response to reactive oxygen species|GO:0044248,cellular catabolic process|GO:0006820,anion transport|GO:0042744,hydrogen peroxide catabolic process|GO:0042743,hydrogen peroxide metabolic process|GO:0044281,small molecule me…	GO:0022626,cytosolic ribosome|GO:0022627,cytosolic small ribosomal subunit|GO:0031974,membrane-enclosed lumen|GO:0030139,endocytic vesicle|GO:0043229,intracellular organelle|GO:0043228,non-membrane-bounded organelle|GO:0060205,cytoplasmic membrane-bounded vesicle lumen|GO:0005833,hemoglobin complex|GO:0043227,membrane-bounded organelle|GO:0043226,organelle|GO:0015935,small ribosomal subunit|GO:00…	GO:0005344,oxygen transporter activity|GO:0005488,binding|GO:1901363,heterocyclic compound binding|GO:0016491,oxidoreductase activity|GO:0043169,cation binding|GO:0016684,oxidoreductase activity, acting on peroxide as acceptor|GO:0046914,transition metal ion binding|GO:0043167,ion binding|GO:0005506,iron ion binding|GO:0046872,metal ion binding|GO:0020037,heme binding|GO:0005215,transporter activ…	hsa05143,African trypanosomiasis|hsa05144,Malaria	H00020,Colorectal cancer|H00022,Bladder cancer		http://www.uniprot.org/uniprot/P69905	False
MAP2K3	2.37317	1.24681	P46734	MAP2K3	GO:0019220,regulation of phosphate metabolic process|GO:0080090,regulation of primary metabolic process|GO:0019222,regulation of metabolic process|GO:0048584,positive regulation of response to stimulus|GO:0048583,regulation of response to stimulus|GO:0032147,activation of protein kinase activity|GO:0031349,positive regulation of defense response|GO:0003012,muscle system process|GO:0003013,circula…	GO:0031974,membrane-enclosed lumen|GO:0043229,intracellular organelle|GO:0043227,membrane-bounded organelle|GO:0043226,organelle|GO:0005737,cytoplasm|GO:0031981,nuclear lumen|GO:0005634,nucleus|GO:0016020,membrane|GO:0005654,nucleoplasm|GO:0043231,intracellular membrane-bounded organelle|GO:0043233,organelle lumen|GO:0005829,cytosol|GO:0044464,cell part|GO:0005623,cell|GO:0005622,intracellular|GO…	GO:0035639,purine ribonucleoside triphosphate binding|GO:0019899,enzyme binding|GO:0004672,protein kinase activity|GO:0043167,ion binding|GO:1901363,heterocyclic compound binding|GO:0001883,purine nucleoside binding|GO:0001882,nucleoside binding|GO:0043168,anion binding|GO:0019900,kinase binding|GO:0000166,nucleotide binding|GO:0004674,protein serine/threonine kinase activity|GO:0016740,transfera…	hsa04935,unkown|hsa05135,unkown|hsa05235,unkown|hsa05145,Toxoplasmosis|hsa04620,Toll-like receptor signaling pathway|hsa05014,Amyotrophic lateral sclerosis (ALS)|hsa04912,GnRH signaling pathway|hsa04218,Cellular senescence|hsa04015,Rap1 signaling pathway|hsa04664,Fc epsilon RI signaling pathway|hsa05169,Epstein-Barr virus infection|hsa04010,MAPK signaling pathway|hsa04668,TNF signaling pathway|hs…			http://www.uniprot.org/uniprot/P46734	False
HDDC2	2.355	1.23573	V9GZ04	HDDC2	GO:0016311,dephosphorylation|GO:0009987,cellular process|GO:0044237,cellular metabolic process|GO:0006796,phosphate-containing compound metabolic process|GO:0008152,metabolic process|GO:0006793,phosphorus metabolic process		GO:0016787,hydrolase activity|GO:0016791,phosphatase activity|GO:0016788,hydrolase activity, acting on ester bonds|GO:0042578,phosphoric ester hydrolase activity|GO:0003824,catalytic activity|GO:0002953,5'-deoxynucleotidase activity				http://www.uniprot.org/uniprot/V9GZ04	False
FERMT3	2.31425	1.21054	Q86UX7	FERMT3	GO:0022607,cellular component assembly|GO:0016337,single organismal cell-cell adhesion|GO:0034446,substrate adhesion-dependent cell spreading|GO:0043933,macromolecular complex subunit organization|GO:0050896,response to stimulus|GO:0030155,regulation of cell adhesion|GO:0030154,cell differentiation|GO:0048468,cell development|GO:0007596,blood coagulation|GO:0022407,regulation of cell-cell adhesio…	GO:0015629,actin cytoskeleton|GO:0043229,intracellular organelle|GO:0043228,non-membrane-bounded organelle|GO:0005623,cell|GO:0043227,membrane-bounded organelle|GO:0043226,organelle|GO:0030054,cell junction|GO:0005856,cytoskeleton|GO:0002102,podosome|GO:0031982,vesicle|GO:0016020,membrane|GO:0031988,membrane-bounded vesicle|GO:0044430,cytoskeletal part|GO:0032991,macromolecular complex|GO:0042995…	GO:0005178,integrin binding|GO:0044877,macromolecular complex binding|GO:0005488,binding|GO:0005515,protein binding|GO:0032403,protein complex binding|GO:0005102,receptor binding|GO:0050839,cell adhesion molecule binding	hsa04611,Platelet activation			http://www.uniprot.org/uniprot/Q86UX7	False
S100A8	2.29814	1.20047	P05109	S100A8	GO:0090087,regulation of peptide transport|GO:2001235,positive regulation of apoptotic signaling pathway|GO:0051234,establishment of localization|GO:0080090,regulation of primary metabolic process|GO:0019222,regulation of metabolic process|GO:2001233,regulation of apoptotic signaling pathway|GO:0051049,regulation of transport|GO:0048584,positive regulation of response to stimulus|GO:0048583,regul…	GO:0043229,intracellular organelle|GO:0071944,cell periphery|GO:0043227,membrane-bounded organelle|GO:0043226,organelle|GO:0005856,cytoskeleton|GO:0031982,vesicle|GO:0005615,extracellular space|GO:0005634,nucleus|GO:0016020,membrane|GO:0031988,membrane-bounded vesicle|GO:0005576,extracellular region|GO:0005737,cytoplasm|GO:0005886,plasma membrane|GO:1903561,extracellular vesicle|GO:0070062,extrac…	GO:0050786,RAGE receptor binding|GO:0044877,macromolecular complex binding|GO:0008270,zinc ion binding|GO:0036041,long-chain fatty acid binding|GO:0043168,anion binding|GO:0043169,cation binding|GO:0046914,transition metal ion binding|GO:0043167,ion binding|GO:0005509,calcium ion binding|GO:0005504,fatty acid binding|GO:0046872,metal ion binding|GO:0035662,Toll-like receptor 4 binding|GO:0015631,…	hsa04657,IL-17 signaling pathway			http://www.uniprot.org/uniprot/P05109	False
IRGQ	2.25939	1.17593	Q8WZA9	IRGQ			GO:0043168,anion binding|GO:0005488,binding|GO:0019001,guanyl nucleotide binding|GO:0035639,purine ribonucleoside triphosphate binding|GO:0097367,carbohydrate derivative binding|GO:0043167,ion binding|GO:1901363,heterocyclic compound binding|GO:1901265,nucleoside phosphate binding|GO:0000166,nucleotide binding|GO:0036094,small molecule binding|GO:0032561,guanyl ribonucleotide binding|GO:0032553,r…				http://www.uniprot.org/uniprot/Q8WZA9	False
ACTN4	2.2403	1.16369	O43707	ACTN4	GO:0044238,primary metabolic process|GO:0007599,hemostasis|GO:0080090,regulation of primary metabolic process|GO:0019222,regulation of metabolic process|GO:0034446,substrate adhesion-dependent cell spreading|GO:0051049,regulation of transport|GO:0006907,pinocytosis|GO:0048584,positive regulation of response to stimulus|GO:0048583,regulation of response to stimulus|GO:0007162,negative regulation o…	GO:0032432,actin filament bundle|GO:0015629,actin cytoskeleton|GO:0031974,membrane-enclosed lumen|GO:0030016,myofibril|GO:0030017,sarcomere|GO:0043229,intracellular organelle|GO:0043228,non-membrane-bounded organelle|GO:0060205,cytoplasmic membrane-bounded vesicle lumen|GO:0005924,cell-substrate adherens junction|GO:0005925,focal adhesion|GO:0043227,membrane-bounded organelle|GO:0043226,organelle…	GO:0001012,RNA polymerase II regulatory region DNA binding|GO:0031490,chromatin DNA binding|GO:0044877,macromolecular complex binding|GO:0005488,binding|GO:0003676,nucleic acid binding|GO:0003677,DNA binding|GO:0044325,ion channel binding|GO:1901363,heterocyclic compound binding|GO:0001882,nucleoside binding|GO:0043565,sequence-specific DNA binding|GO:0043566,structure-specific DNA binding|GO:000…	hsa05322,Systemic lupus erythematosus|hsa05203,Viral carcinogenesis|hsa04530,Tight junction|hsa04670,Leukocyte transendothelial migration|hsa05146,Amoebiasis|hsa04510,Focal adhesion|hsa04520,Adherens junction|hsa04810,Regulation of actin cytoskeleton			http://www.uniprot.org/uniprot/O43707	False
FLNA	2.1782	1.12314	Q5HY54	FLNA		GO:0005856,cytoskeleton|GO:0005737,cytoplasm|GO:0015629,actin cytoskeleton|GO:0043232,intracellular non-membrane-bounded organelle|GO:0044464,cell part|GO:0016020,membrane|GO:0071944,cell periphery|GO:0005623,cell|GO:0005622,intracellular|GO:0043229,intracellular organelle|GO:0043228,non-membrane-bounded organelle|GO:0005886,plasma membrane|GO:0044424,intracellular part|GO:0043226,organelle	GO:0008092,cytoskeletal protein binding|GO:0051015,actin filament binding|GO:0003779,actin binding|GO:0044877,macromolecular complex binding|GO:0005488,binding|GO:0005515,protein binding|GO:0032403,protein complex binding				http://www.uniprot.org/uniprot/Q5HY54	False
HBG2	2.15086	1.10491	P69892	HBG2	GO:0051234,establishment of localization|GO:0044699,single-organism process|GO:0032501,multicellular organismal process|GO:0007599,hemostasis|GO:0044707,single-multicellular organism process|GO:0050878,regulation of body fluid levels|GO:0006950,response to stress|GO:0050896,response to stimulus|GO:0007596,blood coagulation|GO:0009611,response to wounding|GO:0042060,wound healing|GO:0015669,gas tr…	GO:0043234,protein complex|GO:0005737,cytoplasm|GO:0032991,macromolecular complex|GO:0005615,extracellular space|GO:0005829,cytosol|GO:0044464,cell part|GO:0005623,cell|GO:0005833,hemoglobin complex|GO:0044444,cytoplasmic part|GO:0044445,cytosolic part|GO:0072562,blood microparticle|GO:0044424,intracellular part|GO:0005622,intracellular|GO:0044421,extracellular region part|GO:0005576,extracellula…	GO:0043169,cation binding|GO:0005344,oxygen transporter activity|GO:0022892,substrate-specific transporter activity|GO:0046914,transition metal ion binding|GO:0020037,heme binding|GO:0046906,tetrapyrrole binding|GO:0005215,transporter activity|GO:0043167,ion binding|GO:0019825,oxygen binding|GO:0005488,binding|GO:0097159,organic cyclic compound binding|GO:0005506,iron ion binding|GO:0046872,metal…				http://www.uniprot.org/uniprot/P69892	False
PDIA3	2.14457	1.10069	P30101	PDIA3	GO:2001235,positive regulation of apoptotic signaling pathway|GO:2001236,regulation of extrinsic apoptotic signaling pathway|GO:0008104,protein localization|GO:2001233,regulation of apoptotic signaling pathway|GO:0051049,regulation of transport|GO:0048584,positive regulation of response to stimulus|GO:2001238,positive regulation of extrinsic apoptotic signaling pathway|GO:0051169,nuclear transpor…	GO:0005783,endoplasmic reticulum|GO:0048770,pigment granule|GO:0031974,membrane-enclosed lumen|GO:0043229,intracellular organelle|GO:0005924,cell-substrate adherens junction|GO:0005925,focal adhesion|GO:0043227,membrane-bounded organelle|GO:0043226,organelle|GO:0030054,cell junction|GO:0030055,cell-substrate junction|GO:0005737,cytoplasm|GO:0012505,endomembrane system|GO:0070062,extracellular exo…	GO:0004175,endopeptidase activity|GO:0004197,cysteine-type endopeptidase activity|GO:0042578,phosphoric ester hydrolase activity|GO:0005488,binding|GO:0003676,nucleic acid binding|GO:0008233,peptidase activity|GO:0016864,intramolecular oxidoreductase activity, transposing S-S bonds|GO:0008234,cysteine-type peptidase activity|GO:0016860,intramolecular oxidoreductase activity|GO:0008081,phosphoric …	hsa04612,Antigen processing and presentation|hsa04141,Protein processing in endoplasmic reticulum|hsa05168,Herpes simplex infection|hsa05169,Epstein-Barr virus infection|hsa05170,Human immunodeficiency virus 1 infection|hsa05163,Human cytomegalovirus infection			http://www.uniprot.org/uniprot/P30101	False
TBCB	2.12659	1.08854	K7EP07	TBCB		GO:0005737,cytoplasm|GO:0044446,intracellular organelle part|GO:0043231,intracellular membrane-bounded organelle|GO:0031981,nuclear lumen|GO:0043233,organelle lumen|GO:0005634,nucleus|GO:0044464,cell part|GO:0031974,membrane-enclosed lumen|GO:0005622,intracellular|GO:0005654,nucleoplasm|GO:0070013,intracellular organelle lumen|GO:0043229,intracellular organelle|GO:0044428,nuclear part|GO:0005623,…					http://www.uniprot.org/uniprot/K7EP07	False
METTL7A	2.10681	1.07506	F8VQX6	METTL7A	GO:0032259,methylation|GO:0008152,metabolic process	GO:0016020,membrane|GO:0043232,intracellular non-membrane-bounded organelle|GO:0016021,integral component of membrane|GO:0005811,lipid particle|GO:0044464,cell part|GO:0005623,cell|GO:0005622,intracellular|GO:0043229,intracellular organelle|GO:0043228,non-membrane-bounded organelle|GO:0044424,intracellular part|GO:0044425,membrane part|GO:0043226,organelle|GO:0031224,intrinsic component of membra…	GO:0008757,S-adenosylmethionine-dependent methyltransferase activity|GO:0003824,catalytic activity|GO:0016740,transferase activity|GO:0016741,transferase activity, transferring one-carbon groups|GO:0008168,methyltransferase activity				http://www.uniprot.org/uniprot/F8VQX6	False
LAP3	2.09859	1.06942	P28838	LAP3	GO:0044238,primary metabolic process|GO:0019538,protein metabolic process|GO:0043170,macromolecule metabolic process|GO:0071704,organic substance metabolic process|GO:0008152,metabolic process|GO:0006508,proteolysis|GO:1901564,organonitrogen compound metabolic process|GO:0006807,nitrogen compound metabolic process	GO:0031974,membrane-enclosed lumen|GO:0043229,intracellular organelle|GO:0005924,cell-substrate adherens junction|GO:0005925,focal adhesion|GO:0043227,membrane-bounded organelle|GO:0043226,organelle|GO:0030054,cell junction|GO:0030055,cell-substrate junction|GO:0005737,cytoplasm|GO:0031984,organelle subcompartment|GO:0070062,extracellular exosome|GO:0031981,nuclear lumen|GO:0005634,nucleus|GO:000…	GO:0004177,aminopeptidase activity|GO:0046914,transition metal ion binding|GO:0016787,hydrolase activity|GO:0003824,catalytic activity|GO:0043169,cation binding|GO:0030145,manganese ion binding|GO:0043167,ion binding|GO:0008238,exopeptidase activity|GO:0070011,peptidase activity, acting on L-amino acid peptides|GO:0005488,binding|GO:0008233,peptidase activity|GO:0046872,metal ion binding|GO:00082…	hsa01100,Metabolic pathways|hsa00480,Glutathione metabolism|hsa00330,Arginine and proline metabolism			http://www.uniprot.org/uniprot/P28838	False
QDPR	2.09806	1.06905	P09417	QDPR	GO:0043436,oxoacid metabolic process|GO:0044281,small molecule metabolic process|GO:0044282,small molecule catabolic process|GO:1901362,organic cyclic compound biosynthetic process|GO:1901360,organic cyclic compound metabolic process|GO:1901361,organic cyclic compound catabolic process|GO:0044712,single-organism catabolic process|GO:0044710,single-organism metabolic process|GO:0048513,animal orga…	GO:0043229,intracellular organelle|GO:0043227,membrane-bounded organelle|GO:0043226,organelle|GO:0005737,cytoplasm|GO:1903561,extracellular vesicle|GO:0031982,vesicle|GO:0005739,mitochondrion|GO:0031988,membrane-bounded vesicle|GO:0097458,neuron part|GO:0043005,neuron projection|GO:0042995,cell projection|GO:0070062,extracellular exosome|GO:0043230,extracellular organelle|GO:0043231,intracellular…	GO:0051287,NAD binding|GO:0005488,binding|GO:0043167,ion binding|GO:1901363,heterocyclic compound binding|GO:1901265,nucleoside phosphate binding|GO:0016491,oxidoreductase activity|GO:0043168,anion binding|GO:0050662,coenzyme binding|GO:0050661,NADP binding|GO:0016646,oxidoreductase activity, acting on the CH-NH group of donors, NAD or NADP as acceptor|GO:0016645,oxidoreductase activity, acting o…	hsa01100,Metabolic pathways|hsa00790,Folate biosynthesis			http://www.uniprot.org/uniprot/P09417	False
RAB1A	2.00142	1.00103	P62820	RAB1A	GO:0008104,protein localization|GO:0080090,regulation of primary metabolic process|GO:0019222,regulation of metabolic process|GO:0034446,substrate adhesion-dependent cell spreading|GO:0048468,cell development|GO:0006900,membrane budding|GO:0061024,membrane organization|GO:0007165,signal transduction|GO:0051656,establishment of organelle localization|GO:0061028,establishment of endothelial barrier…	GO:0005783,endoplasmic reticulum|GO:0044421,extracellular region part|GO:0048770,pigment granule|GO:0005789,endoplasmic reticulum membrane|GO:0042175,nuclear outer membrane-endoplasmic reticulum membrane network|GO:0043229,intracellular organelle|GO:0005622,intracellular|GO:0043227,membrane-bounded organelle|GO:0043226,organelle|GO:0005737,cytoplasm|GO:0070062,extracellular exosome|GO:0016023,cyt…	GO:0035639,purine ribonucleoside triphosphate binding|GO:0005488,binding|GO:0043167,ion binding|GO:1901363,heterocyclic compound binding|GO:1901265,nucleoside phosphate binding|GO:0001882,nucleoside binding|GO:0043168,anion binding|GO:0016462,pyrophosphatase activity|GO:0000166,nucleotide binding|GO:0032561,guanyl ribonucleotide binding|GO:0001883,purine nucleoside binding|GO:0032549,ribonucleosi…	hsa04140,Regulation of autophagy|hsa05130,Pathogenic Escherichia coli infection|hsa05134,Legionellosis			http://www.uniprot.org/uniprot/P62820	False
GBE1	1.96228	0.972528	Q04446	GBE1	GO:0044249,cellular biosynthetic process|GO:0009250,glucan biosynthetic process|GO:0044281,small molecule metabolic process|GO:0034645,cellular macromolecule biosynthetic process|GO:0006091,generation of precursor metabolites and energy|GO:0033692,cellular polysaccharide biosynthetic process|GO:0044699,single-organism process|GO:1901576,organic substance biosynthetic process|GO:0044710,single-org…	GO:0005737,cytoplasm|GO:0005622,intracellular|GO:0043230,extracellular organelle|GO:0031982,vesicle|GO:0044421,extracellular region part|GO:0043227,membrane-bounded organelle|GO:0005829,cytosol|GO:0044464,cell part|GO:0005623,cell|GO:0031988,membrane-bounded vesicle|GO:0044444,cytoplasmic part|GO:0005576,extracellular region|GO:0044424,intracellular part|GO:1903561,extracellular vesicle|GO:006501…	GO:0016787,hydrolase activity|GO:0043169,cation binding|GO:0003844,1,4-alpha-glucan branching enzyme activity|GO:0016798,hydrolase activity, acting on glycosyl bonds|GO:0043167,ion binding|GO:0003824,catalytic activity|GO:0016740,transferase activity|GO:0005488,binding|GO:0016757,transferase activity, transferring glycosyl groups|GO:0004553,hydrolase activity, hydrolyzing O-glycosyl compounds|GO:…	hsa01100,Metabolic pathways|hsa00500,Starch and sucrose metabolism			http://www.uniprot.org/uniprot/Q04446	False
PSMD13	1.93374	0.951397	Q9UNM6	PSMD13	GO:0080090,regulation of primary metabolic process|GO:0019222,regulation of metabolic process|GO:0048585,negative regulation of response to stimulus|GO:0048584,positive regulation of response to stimulus|GO:0048583,regulation of response to stimulus|GO:0031349,positive regulation of defense response|GO:0030111,regulation of Wnt signaling pathway|GO:0000280,nuclear division|GO:0007165,signal trans…	GO:0022624,proteasome accessory complex|GO:0031974,membrane-enclosed lumen|GO:0043229,intracellular organelle|GO:0043227,membrane-bounded organelle|GO:0043226,organelle|GO:0005737,cytoplasm|GO:0005838,proteasome regulatory particle|GO:0070062,extracellular exosome|GO:0031981,nuclear lumen|GO:0005634,nucleus|GO:0016020,membrane|GO:0031988,membrane-bounded vesicle|GO:0005654,nucleoplasm|GO:0032991,…	GO:0005198,structural molecule activity	hsa03050,Proteasome|hsa05169,Epstein-Barr virus infection			http://www.uniprot.org/uniprot/Q9UNM6	False
CD59	1.92204	0.94264	P13987	CD59	GO:0007599,hemostasis|GO:0080090,regulation of primary metabolic process|GO:0019222,regulation of metabolic process|GO:0034110,regulation of homotypic cell-cell adhesion|GO:0048585,negative regulation of response to stimulus|GO:0048584,positive regulation of response to stimulus|GO:0048583,regulation of response to stimulus|GO:0007165,signal transduction|GO:0007166,cell surface receptor signaling…	GO:0009897,external side of plasma membrane|GO:0046658,anchored component of plasma membrane|GO:0071944,cell periphery|GO:0098552,side of membrane|GO:0005924,cell-substrate adherens junction|GO:0005925,focal adhesion|GO:0043227,membrane-bounded organelle|GO:0043226,organelle|GO:0030054,cell junction|GO:0030055,cell-substrate junction|GO:0031982,vesicle|GO:0043209,myelin sheath|GO:0031226,intrinsi…	GO:0001848,complement binding|GO:0005488,binding|GO:0005515,protein binding	hsa04610,Complement and coagulation cascades|hsa04640,Hematopoietic cell lineage			http://www.uniprot.org/uniprot/P13987	False
KPNA6	1.86376	0.898214	O60684	KPNA6	GO:0051169,nuclear transport|GO:0008104,protein localization|GO:0080090,regulation of primary metabolic process|GO:0019222,regulation of metabolic process|GO:1901362,organic cyclic compound biosynthetic process|GO:1901360,organic cyclic compound metabolic process|GO:0010604,positive regulation of macromolecule metabolic process|GO:0070727,cellular macromolecule localization|GO:0048518,positive re…	GO:0005737,cytoplasm|GO:0043231,intracellular membrane-bounded organelle|GO:0005634,nucleus|GO:0016020,membrane|GO:0044464,cell part|GO:0005623,cell|GO:0005622,intracellular|GO:0043229,intracellular organelle|GO:0044424,intracellular part|GO:0043227,membrane-bounded organelle|GO:0043226,organelle|GO:0005635,nuclear envelope|GO:0031974,membrane-enclosed lumen|GO:0031975,envelope|GO:0031981,nuclear…	GO:0008565,protein transporter activity|GO:0022892,substrate-specific transporter activity|GO:0005215,transporter activity|GO:0005488,binding|GO:0005515,protein binding|GO:0042277,peptide binding|GO:0005048,signal sequence binding|GO:0008139,nuclear localization sequence binding|GO:0033218,amide binding|GO:0015197,peptide transporter activity|GO:0061608,nuclear import signal receptor activity|GO:…	hsa05164,Influenza A			http://www.uniprot.org/uniprot/O60684	False
CUL2	1.8313	0.872872	Q13617	CUL2	GO:0009628,response to abiotic stimulus|GO:0080090,regulation of primary metabolic process|GO:0019222,regulation of metabolic process|GO:0000082,G1/S transition of mitotic cell cycle|GO:0007165,signal transduction|GO:0010556,regulation of macromolecule biosynthetic process|GO:1901362,organic cyclic compound biosynthetic process|GO:1901360,organic cyclic compound metabolic process|GO:0051716,cellu…	GO:0031974,membrane-enclosed lumen|GO:0043229,intracellular organelle|GO:0043227,membrane-bounded organelle|GO:0043226,organelle|GO:0005737,cytoplasm|GO:0031981,nuclear lumen|GO:0005634,nucleus|GO:0005654,nucleoplasm|GO:1902494,catalytic complex|GO:1990234,transferase complex|GO:0031461,cullin-RING ubiquitin ligase complex|GO:0031462,Cul2-RING ubiquitin ligase complex|GO:0043234,protein complex|G…	GO:0019787,ubiquitin-like protein transferase activity|GO:0031625,ubiquitin protein ligase binding|GO:0044389,ubiquitin-like protein ligase binding|GO:0061630,ubiquitin protein ligase activity|GO:0019899,enzyme binding|GO:0003824,catalytic activity|GO:0016740,transferase activity|GO:0005488,binding|GO:0005515,protein binding|GO:0004842,ubiquitin-protein transferase activity|GO:0061659,ubiquitin-l…	hsa04066,HIF-1 signaling pathway|hsa05211,Renal cell carcinoma|hsa05200,Pathways in cancer|hsa04120,Ubiquitin mediated proteolysis			http://www.uniprot.org/uniprot/Q13617	False
ATP6V1H	1.78418	0.835262	Q9UI12	ATP6V1H	GO:0008104,protein localization|GO:0050688,regulation of defense response to virus|GO:0019222,regulation of metabolic process|GO:0048583,regulation of response to stimulus|GO:0055072,iron ion homeostasis|GO:0006826,iron ion transport|GO:0007165,signal transduction|GO:0007166,cell surface receptor signaling pathway|GO:0055076,transition metal ion homeostasis|GO:0098771,inorganic ion homeostasis|GO…	GO:0000323,lytic vacuole|GO:0043229,intracellular organelle|GO:0000221,vacuolar proton-transporting V-type ATPase, V1 domain|GO:0031988,membrane-bounded vesicle|GO:0043227,membrane-bounded organelle|GO:0043226,organelle|GO:0005737,cytoplasm|GO:0044446,intracellular organelle part|GO:0031982,vesicle|GO:0098796,membrane protein complex|GO:0005773,vacuole|GO:0098805,whole membrane|GO:0016020,membran…	GO:0036442,hydrogen-exporting ATPase activity|GO:0005488,binding|GO:0016887,ATPase activity|GO:0098772,molecular function regulator|GO:0042625,ATPase coupled ion transmembrane transporter activity|GO:0042626,ATPase activity, coupled to transmembrane movement of substances|GO:0016820,hydrolase activity, acting on acid anhydrides, catalyzing transmembrane movement of substances|GO:0042623,ATPase ac…	hsa05120,Epithelial cell signaling in Helicobacter pylori infection|hsa00190,Oxidative phosphorylation|hsa05323,Rheumatoid arthritis|hsa01100,Metabolic pathways|hsa04721,Synaptic vesicle cycle|hsa04142,Lysosome|hsa04145,Phagosome|hsa05165,Human papillomavirus infection|hsa05152,Tuberculosis|hsa05110,Vibrio cholerae infection|hsa04150,mTOR signaling pathway			http://www.uniprot.org/uniprot/Q9UI12	False
DNM2	1.76201	0.817219	P50570	DNM2	GO:0006909,phagocytosis|GO:0051049,regulation of transport|GO:0006907,pinocytosis|GO:0044281,small molecule metabolic process|GO:0051656,establishment of organelle localization|GO:0051650,establishment of vesicle localization|GO:0051716,cellular response to stimulus|GO:0048589,developmental growth|GO:1990138,neuron projection extension|GO:0048468,cell development|GO:2000649,regulation of sodium i…	GO:0030427,site of polarized growth|GO:0030426,growth cone|GO:0030054,cell junction|GO:0030055,cell-substrate junction|GO:0097060,synaptic membrane|GO:0031984,organelle subcompartment|GO:0031982,vesicle|GO:0016023,cytoplasmic, membrane-bounded vesicle|GO:0016020,membrane|GO:0031988,membrane-bounded vesicle|GO:0005794,Golgi apparatus|GO:0098588,bounding membrane of organelle|GO:0098589,membrane re…	GO:0035639,purine ribonucleoside triphosphate binding|GO:0017124,SH3 domain binding|GO:0019899,enzyme binding|GO:0044877,macromolecular complex binding|GO:0005488,binding|GO:0001664,G-protein coupled receptor binding|GO:0043167,ion binding|GO:1901363,heterocyclic compound binding|GO:0001883,purine nucleoside binding|GO:0001882,nucleoside binding|GO:0043168,anion binding|GO:0019900,kinase binding|…	hsa04961,Endocrine and other factor-regulated calcium reabsorption|hsa05100,Bacterial invasion of epithelial cells|hsa04721,Synaptic vesicle cycle|hsa04072,Phospholipase D signaling pathway|hsa04144,Endocytosis|hsa04666,Fc gamma R-mediated phagocytosis			http://www.uniprot.org/uniprot/P50570	False
HBE1	1.75126	0.808396	P02100	HBE1	GO:0007599,hemostasis|GO:0080090,regulation of primary metabolic process|GO:0019222,regulation of metabolic process|GO:0007596,blood coagulation|GO:1901362,organic cyclic compound biosynthetic process|GO:1901360,organic cyclic compound metabolic process|GO:0010605,negative regulation of macromolecule metabolic process|GO:0009611,response to wounding|GO:0048519,negative regulation of biological pr…	GO:0043234,protein complex|GO:0005737,cytoplasm|GO:0032991,macromolecular complex|GO:0005615,extracellular space|GO:0005829,cytosol|GO:0044464,cell part|GO:0005623,cell|GO:0005833,hemoglobin complex|GO:0044444,cytoplasmic part|GO:0044445,cytosolic part|GO:0072562,blood microparticle|GO:0044424,intracellular part|GO:0005622,intracellular|GO:0044421,extracellular region part|GO:0005576,extracellula…	GO:0043169,cation binding|GO:0005344,oxygen transporter activity|GO:0022892,substrate-specific transporter activity|GO:0046914,transition metal ion binding|GO:0020037,heme binding|GO:0046906,tetrapyrrole binding|GO:0030492,hemoglobin binding|GO:0005215,transporter activity|GO:0031721,hemoglobin alpha binding|GO:0043167,ion binding|GO:0019825,oxygen binding|GO:0005488,binding|GO:0005515,protein bi…				http://www.uniprot.org/uniprot/P02100	False
ARHGAP1	1.7406	0.799584	Q07960	ARHGAP1	GO:0009893,positive regulation of metabolic process|GO:0019222,regulation of metabolic process|GO:0048584,positive regulation of response to stimulus|GO:0048583,regulation of response to stimulus|GO:0023056,positive regulation of signaling|GO:0023052,signaling|GO:0007165,signal transduction|GO:0023051,regulation of signaling|GO:0035556,intracellular signal transduction|GO:0010646,regulation of ce…	GO:0071944,cell periphery|GO:0043227,membrane-bounded organelle|GO:0043226,organelle|GO:0005737,cytoplasm|GO:0001726,ruffle|GO:1903561,extracellular vesicle|GO:0031982,vesicle|GO:0016020,membrane|GO:0031988,membrane-bounded vesicle|GO:0031252,cell leading edge|GO:0005886,plasma membrane|GO:0042995,cell projection|GO:0070062,extracellular exosome|GO:0043230,extracellular organelle|GO:0005829,cytos…	GO:0005070,SH3/SH2 adaptor activity|GO:0030674,protein binding, bridging|GO:0035591,signaling adaptor activity|GO:0030234,enzyme regulator activity|GO:0005096,GTPase activator activity|GO:0017124,SH3 domain binding|GO:0030695,GTPase regulator activity|GO:0008047,enzyme activator activity|GO:0005515,protein binding|GO:0005488,binding|GO:0098772,molecular function regulator|GO:0060589,nucleoside-tr…				http://www.uniprot.org/uniprot/Q07960	False
PTPN11	1.73488	0.794833	Q06124	PTPN11	GO:0033157,regulation of intracellular protein transport|GO:0051169,nuclear transport|GO:0051168,nuclear export|GO:0007599,hemostasis|GO:0030252,growth hormone secretion|GO:0051046,regulation of secretion|GO:0051047,positive regulation of secretion|GO:0051048,negative regulation of secretion|GO:0051049,regulation of transport|GO:0007596,blood coagulation|GO:0030220,platelet formation|GO:0001501,s…	GO:0043234,protein complex|GO:0005737,cytoplasm|GO:0005829,cytosol|GO:0032991,macromolecular complex|GO:0043231,intracellular membrane-bounded organelle|GO:0005634,nucleus|GO:0044464,cell part|GO:0044444,cytoplasmic part|GO:0005739,mitochondrion|GO:0005622,intracellular|GO:0043229,intracellular organelle|GO:0005623,cell|GO:0044424,intracellular part|GO:0043227,membrane-bounded organelle|GO:004322…	GO:0016791,phosphatase activity|GO:0019899,enzyme binding|GO:0042578,phosphoric ester hydrolase activity|GO:0044877,macromolecular complex binding|GO:0005488,binding|GO:0001664,G-protein coupled receptor binding|GO:0005070,SH3/SH2 adaptor activity|GO:0043560,insulin receptor substrate binding|GO:0030971,receptor tyrosine kinase binding|GO:0032403,protein complex binding|GO:1990782,protein tyrosin…	hsa05120,Epithelial cell signaling in Helicobacter pylori infection|hsa05220,Chronic myeloid leukemia|hsa05130,Pathogenic Escherichia coli infection|hsa05205,Proteoglycans in cancer|hsa04650,Natural killer cell mediated cytotoxicity|hsa05211,Renal cell carcinoma|hsa04072,Phospholipase D signaling pathway|hsa04630,Jak-STAT signaling pathway|hsa04670,Leukocyte transendothelial migration|hsa05235,un…			http://www.uniprot.org/uniprot/Q06124	False
GMPR	1.72432	0.786026	P36959	GMPR	GO:0009628,response to abiotic stimulus|GO:0044249,cellular biosynthetic process|GO:0034641,cellular nitrogen compound metabolic process|GO:0006807,nitrogen compound metabolic process|GO:0044281,small molecule metabolic process|GO:0072521,purine-containing compound metabolic process|GO:0072522,purine-containing compound biosynthetic process|GO:1901362,organic cyclic compound biosynthetic process|…	GO:0043234,protein complex|GO:0005737,cytoplasm|GO:0032991,macromolecular complex|GO:1902494,catalytic complex|GO:0005829,cytosol|GO:0044464,cell part|GO:0005623,cell|GO:1990204,oxidoreductase complex|GO:0044444,cytoplasmic part|GO:1902560,GMP reductase complex|GO:0044424,intracellular part|GO:0005622,intracellular	GO:0005488,binding|GO:0043169,cation binding|GO:0003920,GMP reductase activity|GO:0043167,ion binding|GO:0003824,catalytic activity|GO:0016657,oxidoreductase activity, acting on NAD(P)H, nitrogenous group as acceptor|GO:0016651,oxidoreductase activity, acting on NAD(P)H|GO:0046872,metal ion binding|GO:0016491,oxidoreductase activity	hsa01100,Metabolic pathways|hsa00230,Purine metabolism			http://www.uniprot.org/uniprot/P36959	False
SGTA	1.67345	0.742825	O43765	SGTA	GO:0009896,positive regulation of catabolic process|GO:0009894,regulation of catabolic process|GO:0051716,cellular response to stimulus|GO:0032436,positive regulation of proteasomal ubiquitin-dependent protein catabolic process|GO:0009893,positive regulation of metabolic process|GO:0032434,regulation of proteasomal ubiquitin-dependent protein catabolic process|GO:0010498,proteasomal protein catab…	GO:0005737,cytoplasm|GO:0005829,cytosol|GO:0016020,membrane|GO:0044464,cell part|GO:0005623,cell|GO:0005622,intracellular|GO:0044444,cytoplasmic part|GO:0044424,intracellular part|GO:0043231,intracellular membrane-bounded organelle|GO:0005634,nucleus|GO:0043229,intracellular organelle|GO:0043227,membrane-bounded organelle|GO:0043226,organelle|GO:0008021,synaptic vesicle|GO:0019898,extrinsic compo…	GO:0070628,proteasome binding|GO:1904288,BAT3 complex binding|GO:0044877,macromolecular complex binding|GO:0005488,binding|GO:0005515,protein binding|GO:0032403,protein complex binding|GO:0043621,protein self-association|GO:0042802,identical protein binding|GO:0005198,structural molecule activity|GO:0032947,protein complex scaffold activity				http://www.uniprot.org/uniprot/O43765	False
HNRNPK	1.66812	0.738222	P61978	HNRNPK	GO:0080090,regulation of primary metabolic process|GO:0019222,regulation of metabolic process|GO:0051049,regulation of transport|GO:0007165,signal transduction|GO:0048260,positive regulation of receptor-mediated endocytosis|GO:1901362,organic cyclic compound biosynthetic process|GO:0071840,cellular component organization or biogenesis|GO:0051716,cellular response to stimulus|GO:0010604,positive r…	GO:0042995,cell projection|GO:0015629,actin cytoskeleton|GO:0005924,cell-substrate adherens junction|GO:0031974,membrane-enclosed lumen|GO:0043229,intracellular organelle|GO:0043228,non-membrane-bounded organelle|GO:0000785,chromatin|GO:0000228,nuclear chromosome|GO:0005925,focal adhesion|GO:0043227,membrane-bounded organelle|GO:0043226,organelle|GO:0030054,cell junction|GO:0030055,cell-substrate…	GO:0001012,RNA polymerase II regulatory region DNA binding|GO:0001159,core promoter proximal region DNA binding|GO:0001077,transcriptional activator activity, RNA polymerase II core promoter proximal region sequence-specific binding|GO:0005488,binding|GO:0003676,nucleic acid binding|GO:0003677,DNA binding|GO:1901363,heterocyclic compound binding|GO:0043565,sequence-specific DNA binding|GO:0043566…	hsa05206,MicroRNAs in cancer|hsa03040,Spliceosome|hsa05203,Viral carcinogenesis			http://www.uniprot.org/uniprot/P61978	False
RNPEP	1.66621	0.736573	Q9H4A4	RNPEP	GO:0006633,fatty acid biosynthetic process|GO:0006631,fatty acid metabolic process|GO:0006636,unsaturated fatty acid biosynthetic process|GO:0044237,cellular metabolic process|GO:0019752,carboxylic acid metabolic process|GO:0044248,cellular catabolic process|GO:0044249,cellular biosynthetic process|GO:0034641,cellular nitrogen compound metabolic process|GO:0003013,circulatory system process|GO:00…	GO:0043229,intracellular organelle|GO:0071944,cell periphery|GO:0043227,membrane-bounded organelle|GO:0043226,organelle|GO:0005737,cytoplasm|GO:0070062,extracellular exosome|GO:0016023,cytoplasmic, membrane-bounded vesicle|GO:0031410,cytoplasmic vesicle|GO:0016020,membrane|GO:0031988,membrane-bounded vesicle|GO:0005615,extracellular space|GO:0030141,secretory granule|GO:0012505,endomembrane syste…	GO:0004177,aminopeptidase activity|GO:0042277,peptide binding|GO:0046914,transition metal ion binding|GO:0016787,hydrolase activity|GO:0016801,hydrolase activity, acting on ether bonds|GO:0033218,amide binding|GO:0016803,ether hydrolase activity|GO:0043169,cation binding|GO:0003824,catalytic activity|GO:0043167,ion binding|GO:0004301,epoxide hydrolase activity|GO:0008238,exopeptidase activity|GO:…			D00087,Ubenimex (JP16/INN); Bestatin (TN)	http://www.uniprot.org/uniprot/Q9H4A4	False
TUBA1B	1.65698	0.72856	P68363	TUBA1B	GO:0022607,cellular component assembly|GO:0006457,protein folding|GO:0070271,protein complex biogenesis|GO:0043933,macromolecular complex subunit organization|GO:0006458,'de novo' protein folding|GO:0000226,microtubule cytoskeleton organization|GO:0070887,cellular response to chemical stimulus|GO:0034622,cellular macromolecular complex assembly|GO:0044699,single-organism process|GO:0044267,cellul…	GO:0043229,intracellular organelle|GO:0043228,non-membrane-bounded organelle|GO:0005874,microtubule|GO:0043226,organelle|GO:0005856,cytoskeleton|GO:0031982,vesicle|GO:0043209,myelin sheath|GO:0043227,membrane-bounded organelle|GO:0031988,membrane-bounded vesicle|GO:0044430,cytoskeletal part|GO:0005737,cytoplasm|GO:0015630,microtubule cytoskeleton|GO:0005881,cytoplasmic microtubule|GO:0032991,macr…	GO:0005200,structural constituent of cytoskeleton|GO:0044389,ubiquitin-like protein ligase binding|GO:0035639,purine ribonucleoside triphosphate binding|GO:0019899,enzyme binding|GO:0005488,binding|GO:0003676,nucleic acid binding|GO:0000166,nucleotide binding|GO:1901363,heterocyclic compound binding|GO:0001883,purine nucleoside binding|GO:0001882,nucleoside binding|GO:0043168,anion binding|GO:001…	hsa04530,Tight junction|hsa04210,Apoptosis|hsa05130,Pathogenic Escherichia coli infection|hsa04145,Phagosome|hsa04540,Gap junction			http://www.uniprot.org/uniprot/P68363	False
DBNL	1.64924	0.721803	F2Z3E3	DBNL	GO:0032502,developmental process|GO:0044707,single-multicellular organism process|GO:0050808,synapse organization|GO:0030030,cell projection organization|GO:0030031,cell projection assembly|GO:0030154,cell differentiation|GO:0048468,cell development|GO:0022607,cellular component assembly|GO:0031175,neuron projection development|GO:0009653,anatomical structure morphogenesis|GO:0007275,multicellula…		GO:0008092,cytoskeletal protein binding|GO:0051015,actin filament binding|GO:0003779,actin binding|GO:0044877,macromolecular complex binding|GO:0005488,binding|GO:0005515,protein binding|GO:0032403,protein complex binding				http://www.uniprot.org/uniprot/F2Z3E3	False
SH3BGRL3	1.63669	0.710784	Q9H299	SH3BGRL3	GO:0044707,single-multicellular organism process|GO:0009893,positive regulation of metabolic process|GO:0019222,regulation of metabolic process|GO:0033043,regulation of organelle organization|GO:0043933,macromolecular complex subunit organization|GO:1901879,regulation of protein depolymerization|GO:0030036,actin cytoskeleton organization|GO:0051128,regulation of cellular component organization|GO…	GO:0043229,intracellular organelle|GO:0043227,membrane-bounded organelle|GO:0043226,organelle|GO:0005737,cytoplasm|GO:1903561,extracellular vesicle|GO:0031982,vesicle|GO:0005634,nucleus|GO:0031988,membrane-bounded vesicle|GO:0030027,lamellipodium|GO:0031252,cell leading edge|GO:0042995,cell projection|GO:0070062,extracellular exosome|GO:0043230,extracellular organelle|GO:0043231,intracellular mem…	GO:0016491,oxidoreductase activity|GO:0009055,electron carrier activity|GO:0030215,semaphorin receptor binding|GO:0005515,protein binding|GO:0003824,catalytic activity|GO:0015035,protein disulfide oxidoreductase activity|GO:0030234,enzyme regulator activity|GO:0005096,GTPase activator activity|GO:0030695,GTPase regulator activity|GO:0008047,enzyme activator activity|GO:0016667,oxidoreductase acti…				http://www.uniprot.org/uniprot/Q9H299	False
VPS25	1.63139	0.706098	Q9BRG1	VPS25	GO:0008104,protein localization|GO:0080090,regulation of primary metabolic process|GO:0019222,regulation of metabolic process|GO:0061024,membrane organization|GO:1901362,organic cyclic compound biosynthetic process|GO:1901360,organic cyclic compound metabolic process|GO:0070727,cellular macromolecule localization|GO:0044419,interspecies interaction between organisms|GO:0019058,viral life cycle|GO…	GO:0098796,membrane protein complex|GO:0044421,extracellular region part|GO:0031974,membrane-enclosed lumen|GO:0043229,intracellular organelle|GO:0043228,non-membrane-bounded organelle|GO:0043227,membrane-bounded organelle|GO:0043226,organelle|GO:0010008,endosome membrane|GO:0005737,cytoplasm|GO:0070062,extracellular exosome|GO:0031981,nuclear lumen|GO:0005730,nucleolus|GO:0005634,nucleus|GO:0016…	GO:0047485,protein N-terminus binding|GO:0005198,structural molecule activity|GO:0005488,binding|GO:0005515,protein binding|GO:0046983,protein dimerization activity|GO:0042802,identical protein binding|GO:0042803,protein homodimerization activity	hsa04144,Endocytosis			http://www.uniprot.org/uniprot/Q9BRG1	False
WBP2	1.62446	0.699957	Q969T9	WBP2	GO:0008104,protein localization|GO:0035065,regulation of histone acetylation|GO:0035066,positive regulation of histone acetylation|GO:0006473,protein acetylation|GO:0006475,internal protein amino acid acetylation|GO:0031056,regulation of histone modification|GO:0031058,positive regulation of histone modification|GO:1901362,organic cyclic compound biosynthetic process|GO:0071840,cellular component…	GO:0031974,membrane-enclosed lumen|GO:0043229,intracellular organelle|GO:0043228,non-membrane-bounded organelle|GO:0000785,chromatin|GO:0000228,nuclear chromosome|GO:0043227,membrane-bounded organelle|GO:0043226,organelle|GO:0031981,nuclear lumen|GO:0005634,nucleus|GO:0044454,nuclear chromosome part|GO:0005694,chromosome|GO:0000790,nuclear chromatin|GO:0032991,macromolecular complex|GO:0043231,in…	GO:0001012,RNA polymerase II regulatory region DNA binding|GO:0031490,chromatin DNA binding|GO:0001076,transcription factor activity, RNA polymerase II transcription factor binding|GO:0044877,macromolecular complex binding|GO:0005488,binding|GO:0003676,nucleic acid binding|GO:0003677,DNA binding|GO:1901363,heterocyclic compound binding|GO:0043565,sequence-specific DNA binding|GO:0043566,structure…				http://www.uniprot.org/uniprot/Q969T9	False
GMPPB	1.58365	0.663256	Q9Y5P6	GMPPB	GO:0019673,GDP-mannose metabolic process|GO:0009298,GDP-mannose biosynthetic process|GO:0044723,single-organism carbohydrate metabolic process|GO:0034641,cellular nitrogen compound metabolic process|GO:0009165,nucleotide biosynthetic process|GO:0006807,nitrogen compound metabolic process|GO:0044281,small molecule metabolic process|GO:0034645,cellular macromolecule biosynthetic process|GO:1901576,…	GO:0043231,intracellular membrane-bounded organelle|GO:0005737,cytoplasm|GO:0005622,intracellular|GO:0043230,extracellular organelle|GO:0031982,vesicle|GO:0044421,extracellular region part|GO:0043227,membrane-bounded organelle|GO:0044464,cell part|GO:0044444,cytoplasmic part|GO:0005739,mitochondrion|GO:0031988,membrane-bounded vesicle|GO:0043229,intracellular organelle|GO:0005576,extracellular re…	GO:0035639,purine ribonucleoside triphosphate binding|GO:0005488,binding|GO:0043167,ion binding|GO:1901363,heterocyclic compound binding|GO:1901265,nucleoside phosphate binding|GO:0001882,nucleoside binding|GO:0043168,anion binding|GO:0000166,nucleotide binding|GO:0032561,guanyl ribonucleotide binding|GO:0016740,transferase activity|GO:0001883,purine nucleoside binding|GO:0032549,ribonucleoside b…	hsa01100,Metabolic pathways|hsa00051,Fructose and mannose metabolism|hsa00520,Amino sugar and nucleotide sugar metabolism			http://www.uniprot.org/uniprot/Q9Y5P6	False
TPM3	1.56877	0.649631	P06753	TPM3	GO:0006928,movement of cell or subcellular component|GO:0003012,muscle system process|GO:0060322,head development|GO:0007275,multicellular organism development|GO:0044699,single-organism process|GO:0007417,central nervous system development|GO:0030029,actin filament-based process|GO:0033275,actin-myosin filament sliding|GO:0048513,animal organ development|GO:0032502,developmental process|GO:00325…	GO:0032432,actin filament bundle|GO:0015629,actin cytoskeleton|GO:0030016,myofibril|GO:0030017,sarcomere|GO:0043229,intracellular organelle|GO:0043228,non-membrane-bounded organelle|GO:0043227,membrane-bounded organelle|GO:0043226,organelle|GO:0042641,actomyosin|GO:0005856,cytoskeleton|GO:0001725,stress fiber|GO:0042995,cell projection|GO:0031982,vesicle|GO:0031988,membrane-bounded vesicle|GO:004…	GO:0003779,actin binding|GO:0005488,binding|GO:0005515,protein binding|GO:0008092,cytoskeletal protein binding|GO:0051015,actin filament binding|GO:0005198,structural molecule activity|GO:0008307,structural constituent of muscle|GO:0044877,macromolecular complex binding|GO:0032403,protein complex binding	hsa04260,Cardiac muscle contraction|hsa05216,Thyroid cancer|hsa05200,Pathways in cancer|hsa05410,Hypertrophic cardiomyopathy (HCM)|hsa05414,Dilated cardiomyopathy|hsa04261,Adrenergic signaling in cardiomyocytes			http://www.uniprot.org/uniprot/P06753	False
USP9X	1.56839	0.649283	Q93008	USP9X	GO:0048675,axon extension|GO:0044238,primary metabolic process|GO:0080090,regulation of primary metabolic process|GO:0019222,regulation of metabolic process|GO:0048588,developmental cell growth|GO:0048468,cell development|GO:0007292,female gamete generation|GO:0030509,BMP signaling pathway|GO:0060322,head development|GO:0007165,signal transduction|GO:0007166,cell surface receptor signaling pathwa…	GO:0005737,cytoplasm|GO:0045177,apical part of cell|GO:0016020,membrane|GO:0044464,cell part|GO:0005829,cytosol|GO:0044463,cell projection part|GO:0030427,site of polarized growth|GO:0030426,growth cone|GO:0005623,cell|GO:0005622,intracellular|GO:0097458,neuron part|GO:0044444,cytoplasmic part|GO:0043005,neuron projection|GO:0044424,intracellular part|GO:0042995,cell projection|GO:0150034,distal …	GO:0016787,hydrolase activity|GO:0004175,endopeptidase activity|GO:0019783,ubiquitin-like protein-specific protease activity|GO:0005515,protein binding|GO:0004197,cysteine-type endopeptidase activity|GO:0008234,cysteine-type peptidase activity|GO:0046332,SMAD binding|GO:0003824,catalytic activity|GO:0036459,thiol-dependent ubiquitinyl hydrolase activity|GO:0070011,peptidase activity, acting on L-…				http://www.uniprot.org/uniprot/Q93008	False
EPB41	1.5633	0.644591	P11171	EPB41	GO:0030036,actin cytoskeleton organization|GO:0003013,circulatory system process|GO:0071840,cellular component organization or biogenesis|GO:0032092,positive regulation of protein binding|GO:0016043,cellular component organization|GO:0065007,biological regulation|GO:0044699,single-organism process|GO:0044093,positive regulation of molecular function|GO:0065009,regulation of molecular function|GO:…	GO:0015629,actin cytoskeleton|GO:0019898,extrinsic component of membrane|GO:0043229,intracellular organelle|GO:0043228,non-membrane-bounded organelle|GO:0005622,intracellular|GO:0043227,membrane-bounded organelle|GO:0043226,organelle|GO:0005856,cytoskeleton|GO:0005634,nucleus|GO:0016020,membrane|GO:0005737,cytoplasm|GO:0044430,cytoskeletal part|GO:0005794,Golgi apparatus|GO:0014731,spectrin-assoc…	GO:0043168,anion binding|GO:0005200,structural constituent of cytoskeleton|GO:0005515,protein binding|GO:0008092,cytoskeletal protein binding|GO:0035091,phosphatidylinositol binding|GO:0005543,phospholipid binding|GO:0005545,1-phosphatidylinositol binding|GO:0005198,structural molecule activity|GO:0003779,actin binding|GO:0005516,calmodulin binding|GO:0008289,lipid binding|GO:0005488,binding|GO:0…	hsa04530,Tight junction			http://www.uniprot.org/uniprot/P11171	False
SEC14L2	1.5621	0.643488	C9JZI9	SEC14L2	GO:0006810,transport|GO:0051179,localization|GO:0051234,establishment of localization	GO:0044464,cell part|GO:0005623,cell|GO:0005622,intracellular|GO:0005737,cytoplasm|GO:0043231,intracellular membrane-bounded organelle|GO:0005829,cytosol|GO:0044444,cytoplasmic part|GO:0043226,organelle|GO:0043229,intracellular organelle|GO:0044424,intracellular part|GO:0043227,membrane-bounded organelle|GO:0005634,nucleus|GO:0044446,intracellular organelle part|GO:0031981,nuclear lumen|GO:004323…	GO:0005215,transporter activity				http://www.uniprot.org/uniprot/C9JZI9	False
AP2S1	1.55585	0.637705	M0R0N4	AP2S1	GO:0033036,macromolecule localization|GO:0034613,cellular protein localization|GO:0016192,vesicle-mediated transport|GO:0046907,intracellular transport|GO:0070727,cellular macromolecule localization|GO:0006886,intracellular protein transport|GO:0006810,transport|GO:0045184,establishment of protein localization|GO:0008104,protein localization|GO:0071702,organic substance transport|GO:0015031,prote…	GO:0030139,endocytic vesicle|GO:0043229,intracellular organelle|GO:0071944,cell periphery|GO:0030117,membrane coat|GO:0005905,clathrin-coated pit|GO:0030131,clathrin adaptor complex|GO:0030119,AP-type membrane coat adaptor complex|GO:0030132,clathrin coat of coated pit|GO:0030135,coated vesicle|GO:0043226,organelle|GO:0030136,clathrin-coated vesicle|GO:0030665,clathrin-coated vesicle membrane|GO:…	GO:0008565,protein transporter activity|GO:0005215,transporter activity|GO:0022892,substrate-specific transporter activity|GO:0015197,peptide transporter activity|GO:0030674,protein binding, bridging|GO:0038024,cargo receptor activity|GO:0030276,clathrin binding|GO:0005488,binding|GO:0005515,protein binding|GO:0098748,endocytic adaptor activity|GO:0035615,clathrin adaptor activity|GO:0060090,bind…	hsa04721,Synaptic vesicle cycle|hsa05016,Huntington's disease|hsa04961,Endocrine and other factor-regulated calcium reabsorption|hsa04144,Endocytosis			http://www.uniprot.org/uniprot/M0R0N4	False
UBA5	1.55364	0.63565	Q9GZZ9	UBA5	GO:0048583,regulation of response to stimulus|GO:1990592,protein K69-linked ufmylation|GO:0023052,signaling|GO:0007165,signal transduction|GO:0023051,regulation of signaling|GO:0010646,regulation of cell communication|GO:0050789,regulation of biological process|GO:0044699,single-organism process|GO:0044267,cellular protein metabolic process|GO:0051716,cellular response to stimulus|GO:0030522,intr…	GO:0005737,cytoplasm|GO:0043231,intracellular membrane-bounded organelle|GO:0005829,cytosol|GO:0044464,cell part|GO:0044444,cytoplasmic part|GO:0005623,cell|GO:0043226,organelle|GO:0043229,intracellular organelle|GO:0044424,intracellular part|GO:0005622,intracellular|GO:0043227,membrane-bounded organelle|GO:0005634,nucleus|GO:0005794,Golgi apparatus|GO:0012505,endomembrane system	GO:0035639,purine ribonucleoside triphosphate binding|GO:0005488,binding|GO:0043167,ion binding|GO:1901363,heterocyclic compound binding|GO:1901265,nucleoside phosphate binding|GO:0001882,nucleoside binding|GO:0043168,anion binding|GO:0043169,cation binding|GO:0008641,small protein activating enzyme activity|GO:0000166,nucleotide binding|GO:0001883,purine nucleoside binding|GO:0032549,ribonucleos…				http://www.uniprot.org/uniprot/Q9GZZ9	False
EIF4EBP1	1.5295	0.613056	Q13541	EIF4EBP1	GO:0080090,regulation of primary metabolic process|GO:0019222,regulation of metabolic process|GO:0000082,G1/S transition of mitotic cell cycle|GO:0007165,signal transduction|GO:0007166,cell surface receptor signaling pathway|GO:0007167,enzyme linked receptor protein signaling pathway|GO:0007169,transmembrane receptor protein tyrosine kinase signaling pathway|GO:0071840,cellular component organiza…	GO:0031974,membrane-enclosed lumen|GO:0043229,intracellular organelle|GO:0043227,membrane-bounded organelle|GO:0043226,organelle|GO:0005737,cytoplasm|GO:0031981,nuclear lumen|GO:0005634,nucleus|GO:0005654,nucleoplasm|GO:0043234,protein complex|GO:0032991,macromolecular complex|GO:0043231,intracellular membrane-bounded organelle|GO:0043233,organelle lumen|GO:0005829,cytosol|GO:0044464,cell part|GO…	GO:0051721,protein phosphatase 2A binding|GO:0045182,translation regulator activity|GO:0030371,translation repressor activity|GO:0019899,enzyme binding|GO:0019903,protein phosphatase binding|GO:0019902,phosphatase binding|GO:0005488,binding|GO:0005515,protein binding|GO:0008190,eukaryotic initiation factor 4E binding|GO:0031369,translation initiation factor binding	hsa05231,Choline metabolism in cancer|hsa04218,Cellular senescence|hsa01521,EGFR tyrosine kinase inhibitor resistance|hsa04012,ErbB signaling pathway|hsa04211,Longevity regulating pathway|hsa04910,Insulin signaling pathway|hsa05168,Herpes simplex infection|hsa03013,RNA transport|hsa05221,Acute myeloid leukemia|hsa04066,HIF-1 signaling pathway|hsa05165,Human papillomavirus infection|hsa05163,Human…			http://www.uniprot.org/uniprot/Q13541	False
ABCB6	1.51469	0.599018	Q9NP58	ABCB6	GO:0032502,developmental process|GO:0044707,single-multicellular organism process|GO:0008152,metabolic process|GO:1901566,organonitrogen compound biosynthetic process|GO:0050801,ion homeostasis|GO:0006778,porphyrin-containing compound metabolic process|GO:0006779,porphyrin-containing compound biosynthetic process|GO:0042592,homeostatic process|GO:0044249,cellular biosynthetic process|GO:0034641,c…	GO:0005783,endoplasmic reticulum|GO:0005794,Golgi apparatus|GO:0044421,extracellular region part|GO:0098573,intrinsic component of mitochondrial membrane|GO:0031090,organelle membrane|GO:0019867,outer membrane|GO:0098533,ATPase dependent transmembrane transport complex|GO:0031307,integral component of mitochondrial outer membrane|GO:0031306,intrinsic component of mitochondrial outer membrane|GO:0…	GO:0035639,purine ribonucleoside triphosphate binding|GO:0005488,binding|GO:0016887,ATPase activity|GO:0043167,ion binding|GO:1901363,heterocyclic compound binding|GO:0001883,purine nucleoside binding|GO:0001882,nucleoside binding|GO:0043168,anion binding|GO:0051184,cofactor transporter activity|GO:0042626,ATPase activity, coupled to transmembrane movement of substances|GO:0016820,hydrolase activ…	hsa02010,ABC transporters			http://www.uniprot.org/uniprot/Q9NP58	False
FN3KRP	1.50324	0.588076	Q9HA64	FN3KRP	GO:0016310,phosphorylation|GO:0009987,cellular process|GO:0044237,cellular metabolic process|GO:0006796,phosphate-containing compound metabolic process|GO:0008152,metabolic process|GO:0006793,phosphorus metabolic process|GO:0044267,cellular protein metabolic process|GO:1901564,organonitrogen compound metabolic process|GO:0044260,cellular macromolecule metabolic process|GO:0044238,primary metaboli…	GO:0005737,cytoplasm|GO:0005829,cytosol|GO:0044464,cell part|GO:0005623,cell|GO:0005622,intracellular|GO:0044444,cytoplasmic part|GO:0044424,intracellular part	GO:0016772,transferase activity, transferring phosphorus-containing groups|GO:0016740,transferase activity|GO:0016301,kinase activity|GO:0003824,catalytic activity|GO:0016773,phosphotransferase activity, alcohol group as acceptor|GO:0140096,catalytic activity, acting on a protein|GO:0102193,protein-ribulosamine 3-kinase activity				http://www.uniprot.org/uniprot/Q9HA64	False
SVIP	0.668059	-0.581952	Q8NHG7	SVIP	GO:0033157,regulation of intracellular protein transport|GO:1903061,positive regulation of protein lipidation|GO:0008104,protein localization|GO:0080090,regulation of primary metabolic process|GO:0032434,regulation of proteasomal ubiquitin-dependent protein catabolic process|GO:0032435,negative regulation of proteasomal ubiquitin-dependent protein catabolic process|GO:0051049,regulation of transp…	GO:0005783,endoplasmic reticulum|GO:0005789,endoplasmic reticulum membrane|GO:0042175,nuclear outer membrane-endoplasmic reticulum membrane network|GO:0043229,intracellular organelle|GO:0071944,cell periphery|GO:0005623,cell|GO:0000153,cytoplasmic ubiquitin ligase complex|GO:0043227,membrane-bounded organelle|GO:0043226,organelle|GO:0031224,intrinsic component of membrane|GO:0031225,anchored comp…	GO:0051117,ATPase binding|GO:0019899,enzyme binding|GO:0005488,binding|GO:0005515,protein binding|GO:0043621,protein self-association	hsa04141,Protein processing in endoplasmic reticulum			http://www.uniprot.org/uniprot/Q8NHG7	False
PAFAH1B2	0.662779	-0.593401	P68402	PAFAH1B2	GO:0009896,positive regulation of catabolic process|GO:0032106,positive regulation of response to extracellular stimulus|GO:0009894,regulation of catabolic process|GO:0016239,positive regulation of macroautophagy|GO:0009893,positive regulation of metabolic process|GO:0031329,regulation of cellular catabolic process|GO:0032107,regulation of response to nutrient levels|GO:0006950,response to stress…	GO:0031974,membrane-enclosed lumen|GO:0043229,intracellular organelle|GO:0043228,non-membrane-bounded organelle|GO:0043227,membrane-bounded organelle|GO:0043226,organelle|GO:0005737,cytoplasm|GO:0070062,extracellular exosome|GO:0031981,nuclear lumen|GO:0005730,nucleolus|GO:0005634,nucleus|GO:0016020,membrane|GO:0031988,membrane-bounded vesicle|GO:0005576,extracellular region|GO:0005886,plasma mem…	GO:0005488,binding|GO:0016787,hydrolase activity|GO:0016407,acetyltransferase activity|GO:0052689,carboxylic ester hydrolase activity|GO:0016788,hydrolase activity, acting on ester bonds|GO:0003824,catalytic activity|GO:0016740,transferase activity|GO:0003847,1-alkyl-2-acetylglycerophosphocholine esterase activity|GO:0016747,transferase activity, transferring acyl groups other than amino-acyl gro…	hsa01100,Metabolic pathways|hsa00565,Ether lipid metabolism			http://www.uniprot.org/uniprot/P68402	False
STAM	0.66097	-0.597342	Q92783	STAM	GO:0008104,protein localization|GO:0051046,regulation of secretion|GO:0051047,positive regulation of secretion|GO:0051049,regulation of transport|GO:0048585,negative regulation of response to stimulus|GO:0048584,positive regulation of response to stimulus|GO:0048583,regulation of response to stimulus|GO:0061024,membrane organization|GO:0007165,signal transduction|GO:0007166,cell surface receptor …	GO:0043229,intracellular organelle|GO:0043227,membrane-bounded organelle|GO:0043226,organelle|GO:0010008,endosome membrane|GO:0005737,cytoplasm|GO:0031090,organelle membrane|GO:0098805,whole membrane|GO:0016020,membrane|GO:0031901,early endosome membrane|GO:0098588,bounding membrane of organelle|GO:0012505,endomembrane system|GO:0043231,intracellular membrane-bounded organelle|GO:0005829,cytosol|…	GO:0005070,SH3/SH2 adaptor activity|GO:0030674,protein binding, bridging|GO:0035591,signaling adaptor activity|GO:0005488,binding|GO:0005515,protein binding|GO:0060090,binding, bridging|GO:0044389,ubiquitin-like protein ligase binding|GO:0019899,enzyme binding	hsa04144,Endocytosis|hsa04630,Jak-STAT signaling pathway			http://www.uniprot.org/uniprot/Q92783	False
PPP6R3	0.660769	-0.597782	E9PKG4	PPP6R3	GO:0019220,regulation of phosphate metabolic process|GO:0080090,regulation of primary metabolic process|GO:0019222,regulation of metabolic process|GO:0016311,dephosphorylation|GO:0010921,regulation of phosphatase activity|GO:0031323,regulation of cellular metabolic process|GO:0031399,regulation of protein modification process|GO:0006807,nitrogen compound metabolic process|GO:0050789,regulation of…		GO:0019899,enzyme binding|GO:0019903,protein phosphatase binding|GO:0019902,phosphatase binding|GO:0005488,binding|GO:0005515,protein binding				http://www.uniprot.org/uniprot/E9PKG4	False
PSMB3	0.66011	-0.599222	P49720	PSMB3	GO:0080090,regulation of primary metabolic process|GO:0019222,regulation of metabolic process|GO:0048585,negative regulation of response to stimulus|GO:0048584,positive regulation of response to stimulus|GO:0048583,regulation of response to stimulus|GO:0031349,positive regulation of defense response|GO:0030111,regulation of Wnt signaling pathway|GO:0007165,signal transduction|GO:0007166,cell surf…	GO:0015629,actin cytoskeleton|GO:0031974,membrane-enclosed lumen|GO:0043229,intracellular organelle|GO:0043228,non-membrane-bounded organelle|GO:0005622,intracellular|GO:0043227,membrane-bounded organelle|GO:0043226,organelle|GO:0005856,cytoskeleton|GO:0070062,extracellular exosome|GO:0031981,nuclear lumen|GO:0005634,nucleus|GO:0005739,mitochondrion|GO:0031988,membrane-bounded vesicle|GO:0005654,…	GO:0016787,hydrolase activity|GO:0004175,endopeptidase activity|GO:0004298,threonine-type endopeptidase activity|GO:0003824,catalytic activity|GO:0070003,threonine-type peptidase activity|GO:0070011,peptidase activity, acting on L-amino acid peptides|GO:0005488,binding|GO:0005515,protein binding|GO:0008233,peptidase activity|GO:0140096,catalytic activity, acting on a protein	hsa03050,Proteasome			http://www.uniprot.org/uniprot/P49720	False
PSMA4	0.659905	-0.599669	P25789	PSMA4	GO:0080090,regulation of primary metabolic process|GO:0019222,regulation of metabolic process|GO:0048585,negative regulation of response to stimulus|GO:0048584,positive regulation of response to stimulus|GO:0048583,regulation of response to stimulus|GO:0031349,positive regulation of defense response|GO:0030111,regulation of Wnt signaling pathway|GO:0007165,signal transduction|GO:0007166,cell surf…	GO:0035770,ribonucleoprotein granule|GO:0019773,proteasome core complex, alpha-subunit complex|GO:0031974,membrane-enclosed lumen|GO:0043229,intracellular organelle|GO:0043228,non-membrane-bounded organelle|GO:0036464,cytoplasmic ribonucleoprotein granule|GO:0030529,intracellular ribonucleoprotein complex|GO:0043227,membrane-bounded organelle|GO:0043226,organelle|GO:0005737,cytoplasm|GO:0070062,e…	GO:0016787,hydrolase activity|GO:0004175,endopeptidase activity|GO:0004298,threonine-type endopeptidase activity|GO:0003824,catalytic activity|GO:0070003,threonine-type peptidase activity|GO:0070011,peptidase activity, acting on L-amino acid peptides|GO:0005488,binding|GO:0005515,protein binding|GO:0008233,peptidase activity|GO:0140096,catalytic activity, acting on a protein	hsa03050,Proteasome			http://www.uniprot.org/uniprot/P25789	False
YBX3	0.659357	-0.600868	P16989	YBX3	GO:2001234,negative regulation of apoptotic signaling pathway|GO:0048639,positive regulation of developmental growth|GO:0080090,regulation of primary metabolic process|GO:0019222,regulation of metabolic process|GO:2001233,regulation of apoptotic signaling pathway|GO:0048585,negative regulation of response to stimulus|GO:0048583,regulation of response to stimulus|GO:0006139,nucleobase-containing c…	GO:0005737,cytoplasm|GO:0005844,polysome|GO:0005622,intracellular|GO:0032991,macromolecular complex|GO:0043231,intracellular membrane-bounded organelle|GO:0043296,apical junction complex|GO:0005634,nucleus|GO:0044464,cell part|GO:0044444,cytoplasmic part|GO:0005623,cell|GO:0043226,organelle|GO:0044424,intracellular part|GO:0043229,intracellular organelle|GO:0005911,cell-cell junction|GO:0070160,o…	GO:0001012,RNA polymerase II regulatory region DNA binding|GO:0019899,enzyme binding|GO:0031267,small GTPase binding|GO:0051020,GTPase binding|GO:0005488,binding|GO:0003676,nucleic acid binding|GO:0003677,DNA binding|GO:1901363,heterocyclic compound binding|GO:0043565,sequence-specific DNA binding|GO:0043566,structure-specific DNA binding|GO:0003714,transcription corepressor activity|GO:0003712,t…	hsa04530,Tight junction			http://www.uniprot.org/uniprot/P16989	False
ENO2	0.658719	-0.602266	P09104	ENO2	GO:0009167,purine ribonucleoside monophosphate metabolic process|GO:0061621,canonical glycolysis|GO:0061620,glycolytic process through glucose-6-phosphate|GO:0044281,small molecule metabolic process|GO:0009161,ribonucleoside monophosphate metabolic process|GO:1901360,organic cyclic compound metabolic process|GO:0044712,single-organism catabolic process|GO:0044710,single-organism metabolic process…	GO:0071944,cell periphery|GO:0043227,membrane-bounded organelle|GO:0043226,organelle|GO:0005737,cytoplasm|GO:0031982,vesicle|GO:0043209,myelin sheath|GO:0005615,extracellular space|GO:0016020,membrane|GO:0031988,membrane-bounded vesicle|GO:0097458,neuron part|GO:0005576,extracellular region|GO:0043025,neuronal cell body|GO:0043234,protein complex|GO:1902494,catalytic complex|GO:0044297,cell body|…	GO:0043169,cation binding|GO:0043167,ion binding|GO:0016835,carbon-oxygen lyase activity|GO:0016836,hydro-lyase activity|GO:0000287,magnesium ion binding|GO:0004634,phosphopyruvate hydratase activity|GO:0003824,catalytic activity|GO:0005488,binding|GO:0046872,metal ion binding|GO:0016829,lyase activity|GO:0005515,protein binding	hsa01100,Metabolic pathways|hsa01200,Carbon metabolism|hsa04066,HIF-1 signaling pathway|hsa01230,Biosynthesis of amino acids|hsa00010,Glycolysis / Gluconeogenesis|hsa03018,RNA degradation	H00013,Small cell lung cancer|H00043,Neuroblastoma		http://www.uniprot.org/uniprot/P09104	False
S100A6	0.652712	-0.61548	P06703	S100A6	GO:0042127,regulation of cell proliferation|GO:0044707,single-multicellular organism process|GO:0030030,cell projection organization|GO:0048146,positive regulation of fibroblast proliferation|GO:0048145,regulation of fibroblast proliferation|GO:0048144,fibroblast proliferation|GO:0048468,cell development|GO:0032501,multicellular organismal process|GO:0023052,signaling|GO:0007165,signal transducti…	GO:0019897,extrinsic component of plasma membrane|GO:0016020,membrane|GO:0009898,cytoplasmic side of plasma membrane|GO:0019898,extrinsic component of membrane|GO:0043229,intracellular organelle|GO:0071944,cell periphery|GO:0098552,side of membrane|GO:0043227,membrane-bounded organelle|GO:0043226,organelle|GO:0005737,cytoplasm|GO:0001726,ruffle|GO:0042995,cell projection|GO:0031982,vesicle|GO:003…	GO:0022891,substrate-specific transmembrane transporter activity|GO:0043169,cation binding|GO:0022892,substrate-specific transporter activity|GO:0005515,protein binding|GO:0046914,transition metal ion binding|GO:0044548,S100 protein binding|GO:0005215,transporter activity|GO:0008092,cytoskeletal protein binding|GO:0005488,binding|GO:0043167,ion binding|GO:0015075,ion transmembrane transporter act…				http://www.uniprot.org/uniprot/P06703	False
CSNK1A1	0.652691	-0.615528	P48729	CSNK1A1	GO:0022604,regulation of cell morphogenesis|GO:0048856,anatomical structure development|GO:0006909,phagocytosis|GO:0022603,regulation of anatomical structure morphogenesis|GO:0090263,positive regulation of canonical Wnt signaling pathway|GO:0016310,phosphorylation|GO:0048584,positive regulation of response to stimulus|GO:0048583,regulation of response to stimulus|GO:1903047,mitotic cell cycle pro…	GO:0044464,cell part|GO:0031974,membrane-enclosed lumen|GO:0043229,intracellular organelle|GO:0043228,non-membrane-bounded organelle|GO:0005929,cilium|GO:0005622,intracellular|GO:0043227,membrane-bounded organelle|GO:0043226,organelle|GO:0016607,nuclear speck|GO:0016604,nuclear body|GO:0031981,nuclear lumen|GO:0005813,centrosome|GO:0005634,nucleus|GO:0016020,membrane|GO:0005815,microtubule organi…	GO:0035639,purine ribonucleoside triphosphate binding|GO:0004672,protein kinase activity|GO:0043167,ion binding|GO:1901363,heterocyclic compound binding|GO:0001883,purine nucleoside binding|GO:0001882,nucleoside binding|GO:0043168,anion binding|GO:0000166,nucleotide binding|GO:0004674,protein serine/threonine kinase activity|GO:0016740,transferase activity|GO:1901265,nucleoside phosphate binding|…	hsa04340,Hedgehog signaling pathway|hsa05226,Gastric cancer|hsa05225,Hepatocellular carcinoma|hsa05224,Breast cancer|hsa05165,Human papillomavirus infection|hsa04310,Wnt signaling pathway			http://www.uniprot.org/uniprot/P48729	False
LSM3	0.648438	-0.62496	P62310	LSM3	GO:0090304,nucleic acid metabolic process|GO:0034641,cellular nitrogen compound metabolic process|GO:0006807,nitrogen compound metabolic process|GO:0044237,cellular metabolic process|GO:1901360,organic cyclic compound metabolic process|GO:1901361,organic cyclic compound catabolic process|GO:0006139,nucleobase-containing compound metabolic process|GO:1901575,organic substance catabolic process|GO:…	GO:0005737,cytoplasm|GO:0005829,cytosol|GO:0005622,intracellular|GO:0032991,macromolecular complex|GO:0043231,intracellular membrane-bounded organelle|GO:0071013,catalytic step 2 spliceosome|GO:0044464,cell part|GO:0044444,cytoplasmic part|GO:0005623,cell|GO:0043226,organelle|GO:0044446,intracellular organelle part|GO:0043229,intracellular organelle|GO:0044428,nuclear part|GO:0044422,organelle pa…	GO:0003676,nucleic acid binding|GO:0097159,organic cyclic compound binding|GO:0044822,poly(A) RNA binding|GO:0003723,RNA binding|GO:0005515,protein binding|GO:1901363,heterocyclic compound binding|GO:0005488,binding	hsa03040,Spliceosome|hsa03018,RNA degradation			http://www.uniprot.org/uniprot/P62310	False
FAH	0.643807	-0.635301	P16930	FAH	GO:0009065,glutamine family amino acid catabolic process|GO:0019752,carboxylic acid metabolic process|GO:0009063,cellular amino acid catabolic process|GO:0009074,aromatic amino acid family catabolic process|GO:0034641,cellular nitrogen compound metabolic process|GO:0006807,nitrogen compound metabolic process|GO:0044281,small molecule metabolic process|GO:0044282,small molecule catabolic process|G…	GO:0005737,cytoplasm|GO:0005622,intracellular|GO:0043230,extracellular organelle|GO:0031982,vesicle|GO:0044421,extracellular region part|GO:0043227,membrane-bounded organelle|GO:0005829,cytosol|GO:0044464,cell part|GO:0005623,cell|GO:0031988,membrane-bounded vesicle|GO:0044444,cytoplasmic part|GO:0005576,extracellular region|GO:0044424,intracellular part|GO:1903561,extracellular vesicle|GO:006501…	GO:0016823,hydrolase activity, acting on acid carbon-carbon bonds, in ketonic substances|GO:0016787,hydrolase activity|GO:0016822,hydrolase activity, acting on acid carbon-carbon bonds|GO:0043169,cation binding|GO:0043167,ion binding|GO:0004334,fumarylacetoacetase activity|GO:0003824,catalytic activity|GO:0005488,binding|GO:0005515,protein binding|GO:0046872,metal ion binding	hsa01100,Metabolic pathways|hsa00350,Tyrosine metabolism			http://www.uniprot.org/uniprot/P16930	False
PSMG4	0.640528	-0.642667	Q5JS54	PSMG4	GO:0022607,cellular component assembly|GO:0071822,protein complex subunit organization|GO:0070271,protein complex biogenesis|GO:0043933,macromolecular complex subunit organization|GO:0006461,protein complex assembly|GO:0016043,cellular component organization|GO:0065003,macromolecular complex assembly|GO:0044085,cellular component biogenesis|GO:0043248,proteasome assembly|GO:0034622,cellular macro…						http://www.uniprot.org/uniprot/Q5JS54	False
SERPINB1	0.628716	-0.669519	P30740	SERPINB1	GO:0009892,negative regulation of metabolic process|GO:0080090,regulation of primary metabolic process|GO:0019222,regulation of metabolic process|GO:0031324,negative regulation of cellular metabolic process|GO:0031323,regulation of cellular metabolic process|GO:0043086,negative regulation of catalytic activity|GO:0044267,cellular protein metabolic process|GO:0051248,negative regulation of protein…	GO:0005737,cytoplasm|GO:0005622,intracellular|GO:0043230,extracellular organelle|GO:0031982,vesicle|GO:0044421,extracellular region part|GO:0043227,membrane-bounded organelle|GO:0016020,membrane|GO:0044464,cell part|GO:0005623,cell|GO:0031988,membrane-bounded vesicle|GO:0005576,extracellular region|GO:0005615,extracellular space|GO:0044424,intracellular part|GO:1903561,extracellular vesicle|GO:00…	GO:0004866,endopeptidase inhibitor activity|GO:0061135,endopeptidase regulator activity|GO:0061134,peptidase regulator activity|GO:0030414,peptidase inhibitor activity|GO:0004867,serine-type endopeptidase inhibitor activity|GO:0004857,enzyme inhibitor activity|GO:0098772,molecular function regulator|GO:0030234,enzyme regulator activity|GO:0005515,protein binding|GO:0005488,binding	hsa05146,Amoebiasis			http://www.uniprot.org/uniprot/P30740	False
MAP2K1	0.628093	-0.67095	Q02750	MAP2K1	GO:0051049,regulation of transport|GO:0098779,mitophagy in response to mitochondrial depolarization|GO:0051656,establishment of organelle localization|GO:0051650,establishment of vesicle localization|GO:0051716,cellular response to stimulus|GO:0000165,MAPK cascade|GO:0030855,epithelial cell differentiation|GO:0060541,respiratory system development|GO:0031103,axon regeneration|GO:0031102,neuron pr…	GO:0042995,cell projection|GO:0016020,membrane|GO:0005783,endoplasmic reticulum|GO:0044421,extracellular region part|GO:0030425,dendrite|GO:0030424,axon|GO:0043229,intracellular organelle|GO:0043228,non-membrane-bounded organelle|GO:0005924,cell-substrate adherens junction|GO:0005815,microtubule organizing center|GO:0005874,microtubule|GO:0043226,organelle|GO:0030054,cell junction|GO:0030055,cell…	GO:0005488,binding|GO:0008022,protein C-terminus binding|GO:0016791,phosphatase activity|GO:0019207,kinase regulator activity|GO:0035639,purine ribonucleoside triphosphate binding|GO:0019209,kinase activator activity|GO:0019899,enzyme binding|GO:0042578,phosphoric ester hydrolase activity|GO:0060089,molecular transducer activity|GO:0051020,GTPase binding|GO:0019900,kinase binding|GO:0008047,enzym…	hsa04550,Signaling pathways regulating pluripotency of stem cells|hsa05219,Bladder cancer|hsa04510,Focal adhesion|hsa05135,unkown|hsa04022,cGMP-PKG signaling pathway|hsa04650,Natural killer cell mediated cytotoxicity|hsa05210,Colorectal cancer|hsa04726,Serotonergic synapse|hsa05216,Thyroid cancer|hsa05218,Melanoma|hsa04024,cAMP signaling pathway|hsa05215,Prostate cancer|hsa04140,Regulation of aut…		D09666,Selumetinib (USAN/INN)|D10024,Selumetinib sulfate (JAN/USAN)|D10175,Trametinib (USAN)|D10176,Trametinib dimethyl sulfoxide (JAN/USAN); Mekinist (TN)|D10426,Pimasertib (USAN/INN)|D10486,Pimasertib hydrochloride (USAN)|D10604,Binimetinib (JAN/USAN)	http://www.uniprot.org/uniprot/Q02750	False
ACYP1	0.622025	-0.684955	P07311	ACYP1	GO:0009987,cellular process|GO:0044237,cellular metabolic process|GO:0006796,phosphate-containing compound metabolic process|GO:0008152,metabolic process|GO:0006793,phosphorus metabolic process	GO:0043230,extracellular organelle|GO:0031982,vesicle|GO:0044421,extracellular region part|GO:0043227,membrane-bounded organelle|GO:0031988,membrane-bounded vesicle|GO:0005576,extracellular region|GO:1903561,extracellular vesicle|GO:0065010,extracellular membrane-bounded organelle|GO:0043226,organelle|GO:0070062,extracellular exosome	GO:0016787,hydrolase activity|GO:0016818,hydrolase activity, acting on acid anhydrides, in phosphorus-containing anhydrides|GO:0016817,hydrolase activity, acting on acid anhydrides|GO:0003824,catalytic activity|GO:0003998,acylphosphatase activity	hsa00620,Pyruvate metabolism|hsa01100,Metabolic pathways			http://www.uniprot.org/uniprot/P07311	False
MPST	0.6179	-0.694554	P25325	MPST	GO:0044707,single-multicellular organism process|GO:0061008,hepaticobiliary system development|GO:0044237,cellular metabolic process|GO:0021510,spinal cord development|GO:0019752,carboxylic acid metabolic process|GO:0044248,cellular catabolic process|GO:0044249,cellular biosynthetic process|GO:0034641,cellular nitrogen compound metabolic process|GO:0006807,nitrogen compound metabolic process|GO:0…	GO:0044464,cell part|GO:0031975,envelope|GO:0043229,intracellular organelle|GO:0045202,synapse|GO:0043227,membrane-bounded organelle|GO:0043226,organelle|GO:0030054,cell junction|GO:0005737,cytoplasm|GO:0042995,cell projection|GO:0031090,organelle membrane|GO:0016020,membrane|GO:0044444,cytoplasmic part|GO:0005739,mitochondrion|GO:0031988,membrane-bounded vesicle|GO:0097458,neuron part|GO:0043005…	GO:0016784,3-mercaptopyruvate sulfurtransferase activity|GO:0016782,transferase activity, transferring sulfur-containing groups|GO:0016783,sulfurtransferase activity|GO:0003824,catalytic activity|GO:0016740,transferase activity|GO:0005488,binding|GO:0005515,protein binding|GO:0004792,thiosulfate sulfurtransferase activity|GO:0042802,identical protein binding	hsa00920,Sulfur metabolism|hsa00270,Cysteine and methionine metabolism|hsa01100,Metabolic pathways|hsa04122,Sulfur relay system			http://www.uniprot.org/uniprot/P25325	False
KRAS	0.617786	-0.69482	P01116	KRAS	GO:0007599,hemostasis|GO:0007596,blood coagulation|GO:0051716,cellular response to stimulus|GO:0000165,MAPK cascade|GO:0060541,respiratory system development|GO:0035176,social behavior|GO:0048468,cell development|GO:0045859,regulation of protein kinase activity|GO:0097485,neuron projection guidance|GO:0046483,heterocycle metabolic process|GO:0042325,regulation of phosphorylation|GO:0042327,positi…	GO:0019897,extrinsic component of plasma membrane|GO:0009898,cytoplasmic side of plasma membrane|GO:0019898,extrinsic component of membrane|GO:0043229,intracellular organelle|GO:0071944,cell periphery|GO:0098552,side of membrane|GO:0005924,cell-substrate adherens junction|GO:0005925,focal adhesion|GO:0043227,membrane-bounded organelle|GO:0043226,organelle|GO:0030054,cell junction|GO:0030055,cell-…	GO:0035639,purine ribonucleoside triphosphate binding|GO:0044877,macromolecular complex binding|GO:0005488,binding|GO:0000166,nucleotide binding|GO:1901363,heterocyclic compound binding|GO:1901265,nucleoside phosphate binding|GO:0001882,nucleoside binding|GO:0043168,anion binding|GO:0043167,ion binding|GO:0032561,guanyl ribonucleotide binding|GO:0001883,purine nucleoside binding|GO:0032549,ribonu…	hsa04550,Signaling pathways regulating pluripotency of stem cells|hsa05219,Bladder cancer|hsa04929,unkown|hsa05212,Pancreatic cancer|hsa04650,Natural killer cell mediated cytotoxicity|hsa05210,Colorectal cancer|hsa04915,Estrogen signaling pathway|hsa05216,Thyroid cancer|hsa05218,Melanoma|hsa05214,Glioma|hsa05215,Prostate cancer|hsa04140,Regulation of autophagy|hsa04722,Neurotrophin signaling path…	H00019,Pancreatic cancer|H00020,Colorectal cancer		http://www.uniprot.org/uniprot/P01116	False
EEF2	0.60545	-0.72392	P13639	EEF2	GO:0080090,regulation of primary metabolic process|GO:0019222,regulation of metabolic process|GO:0044710,single-organism metabolic process|GO:0044711,single-organism biosynthetic process|GO:0010604,positive regulation of macromolecule metabolic process|GO:0010608,posttranscriptional regulation of gene expression|GO:0043043,peptide biosynthetic process|GO:0002244,hematopoietic progenitor cell diff…	GO:0016234,inclusion body|GO:0016235,aggresome|GO:0043229,intracellular organelle|GO:0071944,cell periphery|GO:0030529,intracellular ribonucleoprotein complex|GO:0043227,membrane-bounded organelle|GO:0043226,organelle|GO:0005737,cytoplasm|GO:0031982,vesicle|GO:0005634,nucleus|GO:0016020,membrane|GO:0031988,membrane-bounded vesicle|GO:0005886,plasma membrane|GO:0032991,macromolecular complex|GO:19…	GO:0035639,purine ribonucleoside triphosphate binding|GO:0019899,enzyme binding|GO:0005488,binding|GO:0003676,nucleic acid binding|GO:0043167,ion binding|GO:1901363,heterocyclic compound binding|GO:0001883,purine nucleoside binding|GO:0001882,nucleoside binding|GO:0043168,anion binding|GO:0016462,pyrophosphatase activity|GO:0000166,nucleotide binding|GO:0032561,guanyl ribonucleotide binding|GO:19…	hsa04152,AMPK signaling pathway|hsa04921,Oxytocin signaling pathway			http://www.uniprot.org/uniprot/P13639	False
ALDOC	0.602865	-0.730092	P09972	ALDOC	GO:0009167,purine ribonucleoside monophosphate metabolic process|GO:0061621,canonical glycolysis|GO:0061620,glycolytic process through glucose-6-phosphate|GO:0044281,small molecule metabolic process|GO:0009161,ribonucleoside monophosphate metabolic process|GO:1901360,organic cyclic compound metabolic process|GO:0044712,single-organism catabolic process|GO:0044710,single-organism metabolic process…	GO:0043229,intracellular organelle|GO:0043228,non-membrane-bounded organelle|GO:0043227,membrane-bounded organelle|GO:0043226,organelle|GO:0005856,cytoskeleton|GO:0031982,vesicle|GO:0005739,mitochondrion|GO:0031988,membrane-bounded vesicle|GO:0005737,cytoplasm|GO:1903561,extracellular vesicle|GO:0070062,extracellular exosome|GO:0043230,extracellular organelle|GO:0043231,intracellular membrane-bou…	GO:0005515,protein binding|GO:0008092,cytoskeletal protein binding|GO:0016829,lyase activity|GO:0016830,carbon-carbon lyase activity|GO:0016832,aldehyde-lyase activity|GO:0003824,catalytic activity|GO:0005488,binding|GO:0004332,fructose-bisphosphate aldolase activity	hsa01200,Carbon metabolism|hsa01100,Metabolic pathways|hsa00030,Pentose phosphate pathway|hsa04066,HIF-1 signaling pathway|hsa00051,Fructose and mannose metabolism|hsa01230,Biosynthesis of amino acids|hsa00010,Glycolysis / Gluconeogenesis			http://www.uniprot.org/uniprot/P09972	False
CFL1	0.595474	-0.74789	P23528	CFL1	GO:0006909,phagocytosis|GO:0048584,positive regulation of response to stimulus|GO:0048583,regulation of response to stimulus|GO:0016358,dendrite development|GO:0008064,regulation of actin polymerization or depolymerization|GO:0007163,establishment or maintenance of cell polarity|GO:0007165,signal transduction|GO:0007166,cell surface receptor signaling pathway|GO:0007167,enzyme linked receptor pro…	GO:0098590,plasma membrane region|GO:0015629,actin cytoskeleton|GO:0044421,extracellular region part|GO:0031974,membrane-enclosed lumen|GO:0043229,intracellular organelle|GO:0043228,non-membrane-bounded organelle|GO:0005924,cell-substrate adherens junction|GO:0005925,focal adhesion|GO:0043227,membrane-bounded organelle|GO:0043226,organelle|GO:0030054,cell junction|GO:0030055,cell-substrate juncti…	GO:0003779,actin binding|GO:0005488,binding|GO:0005515,protein binding|GO:0008092,cytoskeletal protein binding|GO:0043168,anion binding|GO:0035091,phosphatidylinositol binding|GO:0005543,phospholipid binding|GO:0008289,lipid binding|GO:0051015,actin filament binding|GO:0043167,ion binding|GO:1902936,phosphatidylinositol bisphosphate binding|GO:0019903,protein phosphatase binding|GO:0019902,phosph…	hsa05133,Pertussis|hsa04360,Axon guidance|hsa05170,Human immunodeficiency virus 1 infection|hsa04666,Fc gamma R-mediated phagocytosis|hsa04810,Regulation of actin cytoskeleton			http://www.uniprot.org/uniprot/P23528	False
WIPI2	0.59321	-0.753385	Q9Y4P8	WIPI2	GO:0009991,response to extracellular stimulus|GO:0022607,cellular component assembly|GO:0008152,metabolic process|GO:0006950,response to stress|GO:0016236,macroautophagy|GO:1903008,organelle disassembly|GO:0031667,response to nutrient levels|GO:0044248,cellular catabolic process|GO:0044249,cellular biosynthetic process|GO:0008104,protein localization|GO:0042157,lipoprotein metabolic process|GO:00…	GO:0031974,membrane-enclosed lumen|GO:0019898,extrinsic component of membrane|GO:0034045,pre-autophagosomal structure membrane|GO:0043229,intracellular organelle|GO:0043227,membrane-bounded organelle|GO:0043226,organelle|GO:0005737,cytoplasm|GO:0031090,organelle membrane|GO:0031981,nuclear lumen|GO:0005773,vacuole|GO:0005634,nucleus|GO:0016020,membrane|GO:0005776,autophagosome|GO:0005654,nucleopl…	GO:0043168,anion binding|GO:0080025,phosphatidylinositol-3,5-bisphosphate binding|GO:0035091,phosphatidylinositol binding|GO:0005543,phospholipid binding|GO:0032266,phosphatidylinositol-3-phosphate binding|GO:0043167,ion binding|GO:1902936,phosphatidylinositol bisphosphate binding|GO:0005515,protein binding|GO:0008289,lipid binding|GO:1901981,phosphatidylinositol phosphate binding|GO:0005488,bind…	hsa04140,Regulation of autophagy|hsa04136,unkown			http://www.uniprot.org/uniprot/Q9Y4P8	False
CHORDC1	0.587938	-0.766265	Q9UHD1	CHORDC1	GO:0043549,regulation of kinase activity|GO:0019220,regulation of phosphate metabolic process|GO:0080090,regulation of primary metabolic process|GO:0019222,regulation of metabolic process|GO:0034605,cellular response to heat|GO:0048583,regulation of response to stimulus|GO:0071840,cellular component organization or biogenesis|GO:0051716,cellular response to stimulus|GO:0010605,negative regulation…		GO:0043169,cation binding|GO:0046914,transition metal ion binding|GO:0031072,heat shock protein binding|GO:0043167,ion binding|GO:0008270,zinc ion binding|GO:0005515,protein binding|GO:0046872,metal ion binding|GO:0051879,Hsp90 protein binding|GO:0005488,binding|GO:0035639,purine ribonucleoside triphosphate binding|GO:1901363,heterocyclic compound binding|GO:1901265,nucleoside phosphate binding|G…				http://www.uniprot.org/uniprot/Q9UHD1	False
PURA	0.552241	-0.856631	Q00577	PURA	GO:0080090,regulation of primary metabolic process|GO:0019222,regulation of metabolic process|GO:1901362,organic cyclic compound biosynthetic process|GO:0071840,cellular component organization or biogenesis|GO:0010605,negative regulation of macromolecule metabolic process|GO:0010608,posttranscriptional regulation of gene expression|GO:0043043,peptide biosynthetic process|GO:0006260,DNA replicatio…	GO:0031974,membrane-enclosed lumen|GO:0000781,chromosome, telomeric region|GO:0043229,intracellular organelle|GO:0005662,DNA replication factor A complex|GO:0000784,nuclear chromosome, telomeric region|GO:0000228,nuclear chromosome|GO:0043227,membrane-bounded organelle|GO:0043226,organelle|GO:0005737,cytoplasm|GO:0031981,nuclear lumen|GO:0097458,neuron part|GO:0005634,nucleus|GO:0044454,nuclear c…	GO:0005488,binding|GO:0003676,nucleic acid binding|GO:0003677,DNA binding|GO:1901363,heterocyclic compound binding|GO:0043565,sequence-specific DNA binding|GO:0043566,structure-specific DNA binding|GO:0000900,translation repressor activity, nucleic acid binding|GO:0008134,transcription factor binding|GO:0003690,double-stranded DNA binding|GO:0003691,double-stranded telomeric DNA binding|GO:000369…				http://www.uniprot.org/uniprot/Q00577	False
LDHB	0.547531	-0.868988	P07195	LDHB	GO:0019674,NAD metabolic process|GO:0006732,coenzyme metabolic process|GO:0006733,oxidoreduction coenzyme metabolic process|GO:0019752,carboxylic acid metabolic process|GO:1901615,organic hydroxy compound metabolic process|GO:0034641,cellular nitrogen compound metabolic process|GO:0006807,nitrogen compound metabolic process|GO:0046496,nicotinamide nucleotide metabolic process|GO:0006090,pyruvate …	GO:0043229,intracellular organelle|GO:0043227,membrane-bounded organelle|GO:0043226,organelle|GO:0005737,cytoplasm|GO:0031982,vesicle|GO:0043209,myelin sheath|GO:0098805,whole membrane|GO:0016020,membrane|GO:0005739,mitochondrion|GO:0031988,membrane-bounded vesicle|GO:0098589,membrane region|GO:1903561,extracellular vesicle|GO:0070062,extracellular exosome|GO:0043230,extracellular organelle|GO:00…	GO:0005488,binding|GO:0050662,coenzyme binding|GO:0016614,oxidoreductase activity, acting on CH-OH group of donors|GO:0005515,protein binding|GO:0016616,oxidoreductase activity, acting on the CH-OH group of donors, NAD or NADP as acceptor|GO:0019900,kinase binding|GO:0051287,NAD binding|GO:0019899,enzyme binding|GO:0000166,nucleotide binding|GO:0036094,small molecule binding|GO:0003824,catalytic …	hsa00270,Cysteine and methionine metabolism|hsa00620,Pyruvate metabolism|hsa01100,Metabolic pathways|hsa05230,Central carbon metabolism in cancer|hsa04066,HIF-1 signaling pathway|hsa00640,Propanoate metabolism|hsa00010,Glycolysis / Gluconeogenesis|hsa04922,Glucagon signaling pathway	H00010,Multiple myeloma|H00023,Testicular cancer|H00035,Ewing's sarcoma|H00043,Neuroblastoma		http://www.uniprot.org/uniprot/P07195	False
CUL5	0.540388	-0.887932	Q93034	CUL5	GO:0009628,response to abiotic stimulus|GO:0000082,G1/S transition of mitotic cell cycle|GO:0044257,cellular protein catabolic process|GO:0060322,head development|GO:0007165,signal transduction|GO:0098771,inorganic ion homeostasis|GO:0051716,cellular response to stimulus|GO:0045786,negative regulation of cell cycle|GO:0070647,protein modification by small protein conjugation or removal|GO:0044419…	GO:0043229,intracellular organelle|GO:0071944,cell periphery|GO:0043227,membrane-bounded organelle|GO:0043226,organelle|GO:0005737,cytoplasm|GO:0005634,nucleus|GO:0016020,membrane|GO:1902494,catalytic complex|GO:1990234,transferase complex|GO:0005886,plasma membrane|GO:0031461,cullin-RING ubiquitin ligase complex|GO:0031466,Cul5-RING ubiquitin ligase complex|GO:0043234,protein complex|GO:0032991,…	GO:0005261,cation channel activity|GO:0005262,calcium channel activity|GO:0019899,enzyme binding|GO:0060089,molecular transducer activity|GO:0004872,receptor activity|GO:0044389,ubiquitin-like protein ligase binding|GO:0019787,ubiquitin-like protein transferase activity|GO:0015085,calcium ion transmembrane transporter activity|GO:0061630,ubiquitin protein ligase activity|GO:0072509,divalent inorg…	hsa05170,Human immunodeficiency virus 1 infection|hsa04120,Ubiquitin mediated proteolysis			http://www.uniprot.org/uniprot/Q93034	False
HSPH1	0.528149	-0.920984	Q92598	HSPH1	GO:2001234,negative regulation of apoptotic signaling pathway|GO:1903037,regulation of leukocyte cell-cell adhesion|GO:0043549,regulation of kinase activity|GO:0019220,regulation of phosphate metabolic process|GO:0080090,regulation of primary metabolic process|GO:0019222,regulation of metabolic process|GO:2001233,regulation of apoptotic signaling pathway|GO:0048585,negative regulation of response…	GO:0031974,membrane-enclosed lumen|GO:0030139,endocytic vesicle|GO:0043229,intracellular organelle|GO:0043228,non-membrane-bounded organelle|GO:0060205,cytoplasmic membrane-bounded vesicle lumen|GO:0005622,intracellular|GO:0005874,microtubule|GO:0043226,organelle|GO:0005856,cytoskeleton|GO:0044433,cytoplasmic vesicle part|GO:0031983,vesicle lumen|GO:0031982,vesicle|GO:0031981,nuclear lumen|GO:001…	GO:0035639,purine ribonucleoside triphosphate binding|GO:0005488,binding|GO:0043167,ion binding|GO:1901363,heterocyclic compound binding|GO:1901265,nucleoside phosphate binding|GO:0001882,nucleoside binding|GO:0043168,anion binding|GO:0000166,nucleotide binding|GO:0001883,purine nucleoside binding|GO:0032549,ribonucleoside binding|GO:0017076,purine nucleotide binding|GO:0005524,ATP binding|GO:001…	hsa04141,Protein processing in endoplasmic reticulum			http://www.uniprot.org/uniprot/Q92598	False
IGBP1	0.523619	-0.933412	P78318	IGBP1	GO:2001234,negative regulation of apoptotic signaling pathway|GO:0019220,regulation of phosphate metabolic process|GO:0080090,regulation of primary metabolic process|GO:0019222,regulation of metabolic process|GO:2001233,regulation of apoptotic signaling pathway|GO:0006470,protein dephosphorylation|GO:0048585,negative regulation of response to stimulus|GO:0048583,regulation of response to stimulus…	GO:0005856,cytoskeleton|GO:0043234,protein complex|GO:0015630,microtubule cytoskeleton|GO:0043228,non-membrane-bounded organelle|GO:0043232,intracellular non-membrane-bounded organelle|GO:0005829,cytosol|GO:0044464,cell part|GO:0044444,cytoplasmic part|GO:0005623,cell|GO:0005737,cytoplasm|GO:0044446,intracellular organelle part|GO:0043229,intracellular organelle|GO:0044430,cytoskeletal part|GO:00…	GO:0051721,protein phosphatase 2A binding|GO:0031434,mitogen-activated protein kinase kinase binding|GO:0019888,protein phosphatase regulator activity|GO:0019208,phosphatase regulator activity|GO:0019899,enzyme binding|GO:0019901,protein kinase binding|GO:0019900,kinase binding|GO:0019903,protein phosphatase binding|GO:0019902,phosphatase binding|GO:0044877,macromolecular complex binding|GO:00199…	hsa04140,Regulation of autophagy|hsa04136,unkown			http://www.uniprot.org/uniprot/P78318	False
TPI1	0.517926	-0.949182	P60174	TPI1	GO:0009167,purine ribonucleoside monophosphate metabolic process|GO:0061621,canonical glycolysis|GO:0061620,glycolytic process through glucose-6-phosphate|GO:0044281,small molecule metabolic process|GO:0009161,ribonucleoside monophosphate metabolic process|GO:1901360,organic cyclic compound metabolic process|GO:0044712,single-organism catabolic process|GO:0044710,single-organism metabolic process…	GO:0043229,intracellular organelle|GO:0043227,membrane-bounded organelle|GO:0043226,organelle|GO:0005737,cytoplasm|GO:0031982,vesicle|GO:0005634,nucleus|GO:0031988,membrane-bounded vesicle|GO:1903561,extracellular vesicle|GO:0005615,extracellular space|GO:0043230,extracellular organelle|GO:0043231,intracellular membrane-bounded organelle|GO:0070062,extracellular exosome|GO:0005829,cytosol|GO:0044…	GO:0031625,ubiquitin protein ligase binding|GO:0044389,ubiquitin-like protein ligase binding|GO:0016853,isomerase activity|GO:0019899,enzyme binding|GO:0003824,catalytic activity|GO:0005488,binding|GO:0005515,protein binding|GO:0016860,intramolecular oxidoreductase activity|GO:0016861,intramolecular oxidoreductase activity, interconverting aldoses and ketoses|GO:0004807,triose-phosphate isomerase…	hsa00562,Inositol phosphate metabolism|hsa01100,Metabolic pathways|hsa01200,Carbon metabolism|hsa00051,Fructose and mannose metabolism|hsa01230,Biosynthesis of amino acids|hsa00010,Glycolysis / Gluconeogenesis			http://www.uniprot.org/uniprot/P60174	False
PNPO	0.508316	-0.976203	Q9NVS9	PNPO	GO:0050688,regulation of defense response to virus|GO:0019222,regulation of metabolic process|GO:0048584,positive regulation of response to stimulus|GO:0048583,regulation of response to stimulus|GO:0098779,mitophagy in response to mitochondrial depolarization|GO:0044281,small molecule metabolic process|GO:0044283,small molecule biosynthetic process|GO:1901362,organic cyclic compound biosynthetic …	GO:0031974,membrane-enclosed lumen|GO:0043229,intracellular organelle|GO:0043227,membrane-bounded organelle|GO:0043226,organelle|GO:0005737,cytoplasm|GO:0070062,extracellular exosome|GO:0031981,nuclear lumen|GO:0005634,nucleus|GO:0031988,membrane-bounded vesicle|GO:0005654,nucleoplasm|GO:1903561,extracellular vesicle|GO:0031982,vesicle|GO:0043230,extracellular organelle|GO:0043231,intracellular m…	GO:0043168,anion binding|GO:0050662,coenzyme binding|GO:0016638,oxidoreductase activity, acting on the CH-NH2 group of donors|GO:0097367,carbohydrate derivative binding|GO:0097159,organic cyclic compound binding|GO:0016641,oxidoreductase activity, acting on the CH-NH2 group of donors, oxygen as acceptor|GO:0004733,pyridoxamine-phosphate oxidase activity|GO:0000166,nucleotide binding|GO:0036094,sm…	hsa00750,Vitamin B6 metabolism|hsa01100,Metabolic pathways			http://www.uniprot.org/uniprot/Q9NVS9	False
DCAF11	0.500617	-0.998221	Q8TEB1	DCAF11	GO:0071704,organic substance metabolic process|GO:0044267,cellular protein metabolic process|GO:0044238,primary metabolic process|GO:0044260,cellular macromolecule metabolic process|GO:0032446,protein modification by small protein conjugation|GO:0019538,protein metabolic process|GO:0009987,cellular process|GO:0070647,protein modification by small protein conjugation or removal|GO:0006464,cellular…	GO:0031974,membrane-enclosed lumen|GO:0043229,intracellular organelle|GO:0043227,membrane-bounded organelle|GO:0043226,organelle|GO:0031981,nuclear lumen|GO:0005634,nucleus|GO:0080008,Cul4-RING E3 ubiquitin ligase complex|GO:0005654,nucleoplasm|GO:1902494,catalytic complex|GO:1990234,transferase complex|GO:0031461,cullin-RING ubiquitin ligase complex|GO:0043234,protein complex|GO:0032991,macromol…	GO:0005488,binding|GO:0005515,protein binding				http://www.uniprot.org/uniprot/Q8TEB1	False
AIDA	0.493444	-1.01904	Q96BJ3	AIDA	GO:0043549,regulation of kinase activity|GO:0019220,regulation of phosphate metabolic process|GO:0080090,regulation of primary metabolic process|GO:0019222,regulation of metabolic process|GO:0048585,negative regulation of response to stimulus|GO:0048583,regulation of response to stimulus|GO:0007165,signal transduction|GO:0023014,signal transduction by protein phosphorylation|GO:0044710,single-org…	GO:0005737,cytoplasm|GO:0044464,cell part|GO:0005623,cell|GO:0005622,intracellular|GO:0044424,intracellular part|GO:0016020,membrane	GO:0019904,protein domain specific binding|GO:0005515,protein binding|GO:0005488,binding|GO:0043168,anion binding|GO:0035091,phosphatidylinositol binding|GO:0005543,phospholipid binding|GO:0008289,lipid binding|GO:0043167,ion binding				http://www.uniprot.org/uniprot/Q96BJ3	False
HDHD2	0.492557	-1.02164	Q9H0R4	HDHD2	GO:0016311,dephosphorylation|GO:0009987,cellular process|GO:0044237,cellular metabolic process|GO:0006796,phosphate-containing compound metabolic process|GO:0008152,metabolic process|GO:0006793,phosphorus metabolic process	GO:0043230,extracellular organelle|GO:0031982,vesicle|GO:0044421,extracellular region part|GO:0043227,membrane-bounded organelle|GO:0031988,membrane-bounded vesicle|GO:0005576,extracellular region|GO:1903561,extracellular vesicle|GO:0065010,extracellular membrane-bounded organelle|GO:0043226,organelle|GO:0070062,extracellular exosome|GO:0005615,extracellular space	GO:0043169,cation binding|GO:0019899,enzyme binding|GO:0043167,ion binding|GO:0005488,binding|GO:0005515,protein binding|GO:0046872,metal ion binding|GO:0016787,hydrolase activity|GO:0016791,phosphatase activity|GO:0016788,hydrolase activity, acting on ester bonds|GO:0042578,phosphoric ester hydrolase activity|GO:0003824,catalytic activity				http://www.uniprot.org/uniprot/Q9H0R4	False
EIF4B	0.490105	-1.02884	E7EX17	EIF4B	GO:0022607,cellular component assembly|GO:0070271,protein complex biogenesis|GO:0043933,macromolecular complex subunit organization|GO:0044249,cellular biosynthetic process|GO:0034641,cellular nitrogen compound metabolic process|GO:0006807,nitrogen compound metabolic process|GO:0034645,cellular macromolecule biosynthetic process|GO:0034622,cellular macromolecular complex assembly|GO:1901576,organ…	GO:0005623,cell|GO:0044464,cell part|GO:0044297,cell body|GO:0030425,dendrite|GO:0097458,neuron part|GO:0036477,somatodendritic compartment|GO:0043005,neuron projection|GO:0043025,neuronal cell body|GO:0005737,cytoplasm|GO:0044424,intracellular part|GO:0005829,cytosol|GO:0044444,cytoplasmic part|GO:0005622,intracellular|GO:0045202,synapse|GO:0120038,plasma membrane bounded cell projection part|GO…	GO:0097159,organic cyclic compound binding|GO:0000166,nucleotide binding|GO:0036094,small molecule binding|GO:0005488,binding|GO:0003676,nucleic acid binding|GO:1901363,heterocyclic compound binding|GO:1901265,nucleoside phosphate binding|GO:0003723,RNA binding	hsa05205,Proteoglycans in cancer|hsa03013,RNA transport|hsa04150,mTOR signaling pathway|hsa04151,PI3K-Akt signaling pathway			http://www.uniprot.org/uniprot/E7EX17	False
GPHN	0.479613	-1.06006	Q9NQX3	GPHN	GO:0006777,Mo-molybdopterin cofactor biosynthetic process|GO:0050808,synapse organization|GO:0006732,coenzyme metabolic process|GO:0006807,nitrogen compound metabolic process|GO:0061024,membrane organization|GO:0022607,cellular component assembly|GO:0009108,coenzyme biosynthetic process|GO:0044281,small molecule metabolic process|GO:0051641,cellular localization|GO:1901576,organic substance biosy…	GO:0098590,plasma membrane region|GO:0043229,intracellular organelle|GO:0043228,non-membrane-bounded organelle|GO:0045202,synapse|GO:0005622,intracellular|GO:0043226,organelle|GO:0030054,cell junction|GO:0097060,synaptic membrane|GO:0098805,whole membrane|GO:0016020,membrane|GO:0098794,postsynapse|GO:0044456,synapse part|GO:0044459,plasma membrane part|GO:0005856,cytoskeleton|GO:0098589,membrane …	GO:0035639,purine ribonucleoside triphosphate binding|GO:0005488,binding|GO:0043167,ion binding|GO:1901363,heterocyclic compound binding|GO:1901265,nucleoside phosphate binding|GO:0001882,nucleoside binding|GO:0061599,molybdopterin molybdotransferase activity|GO:0061598,molybdopterin adenylyltransferase activity|GO:0000166,nucleotide binding|GO:0016740,transferase activity|GO:0001883,purine nucle…	hsa01100,Metabolic pathways|hsa00790,Folate biosynthesis|hsa04727,GABAergic synapse			http://www.uniprot.org/uniprot/Q9NQX3	False
RIC8A	0.462598	-1.11217	H0YE35	RIC8A	GO:0009893,positive regulation of metabolic process|GO:0019222,regulation of metabolic process|GO:0023052,signaling|GO:0007165,signal transduction|GO:0043087,regulation of GTPase activity|GO:0050789,regulation of biological process|GO:0044699,single-organism process|GO:0051716,cellular response to stimulus|GO:0043547,positive regulation of GTPase activity|GO:0051345,positive regulation of hydrola…	GO:0005737,cytoplasm|GO:0016020,membrane|GO:0044464,cell part|GO:0005623,cell|GO:0005622,intracellular|GO:0071944,cell periphery|GO:0005886,plasma membrane|GO:0044424,intracellular part	GO:0005085,guanyl-nucleotide exchange factor activity|GO:0030234,enzyme regulator activity|GO:0005096,GTPase activator activity|GO:0030695,GTPase regulator activity|GO:0001965,G-protein alpha-subunit binding|GO:0008047,enzyme activator activity|GO:0005515,protein binding|GO:0098772,molecular function regulator|GO:0060589,nucleoside-triphosphatase regulator activity|GO:0005488,binding				http://www.uniprot.org/uniprot/H0YE35	False
DTYMK	0.450646	-1.14993	P23919	DTYMK	GO:0009211,pyrimidine deoxyribonucleoside triphosphate metabolic process|GO:0009212,pyrimidine deoxyribonucleoside triphosphate biosynthetic process|GO:0009219,pyrimidine deoxyribonucleotide metabolic process|GO:0009165,nucleotide biosynthetic process|GO:0044281,small molecule metabolic process|GO:1901362,organic cyclic compound biosynthetic process|GO:1901360,organic cyclic compound metabolic pr…	GO:0031970,organelle envelope lumen|GO:0031974,membrane-enclosed lumen|GO:0031975,envelope|GO:0043229,intracellular organelle|GO:0043227,membrane-bounded organelle|GO:0043226,organelle|GO:0005737,cytoplasm|GO:0005740,mitochondrial envelope|GO:0005739,mitochondrion|GO:0005759,mitochondrial matrix|GO:0005758,mitochondrial intermembrane space|GO:0031967,organelle envelope|GO:0043231,intracellular me…	GO:0019201,nucleotide kinase activity|GO:0019205,nucleobase-containing compound kinase activity|GO:0035639,purine ribonucleoside triphosphate binding|GO:0005488,binding|GO:0004798,thymidylate kinase activity|GO:0009041,uridylate kinase activity|GO:0043167,ion binding|GO:1901363,heterocyclic compound binding|GO:0001883,purine nucleoside binding|GO:0001882,nucleoside binding|GO:0043168,anion bindin…	hsa01100,Metabolic pathways|hsa00240,Pyrimidine metabolism			http://www.uniprot.org/uniprot/P23919	False
HINT1	0.438723	-1.18862	P49773	HINT1	GO:0080090,regulation of primary metabolic process|GO:0019222,regulation of metabolic process|GO:0048584,positive regulation of response to stimulus|GO:0048583,regulation of response to stimulus|GO:0050848,regulation of calcium-mediated signaling|GO:0009166,nucleotide catabolic process|GO:0007165,signal transduction|GO:1901362,organic cyclic compound biosynthetic process|GO:1901360,organic cyclic…	GO:0031974,membrane-enclosed lumen|GO:0043229,intracellular organelle|GO:0043228,non-membrane-bounded organelle|GO:0043227,membrane-bounded organelle|GO:0043226,organelle|GO:0005856,cytoskeleton|GO:0070062,extracellular exosome|GO:0031981,nuclear lumen|GO:0005634,nucleus|GO:0016020,membrane|GO:0031988,membrane-bounded vesicle|GO:0005654,nucleoplasm|GO:0005576,extracellular region|GO:0044451,nucle…	GO:0016787,hydrolase activity|GO:0019900,kinase binding|GO:0019901,protein kinase binding|GO:0005080,protein kinase C binding|GO:0019899,enzyme binding|GO:0000166,nucleotide binding|GO:0036094,small molecule binding|GO:0003824,catalytic activity|GO:0005488,binding|GO:0005515,protein binding|GO:0097159,organic cyclic compound binding|GO:1901363,heterocyclic compound binding|GO:1901265,nucleoside p…				http://www.uniprot.org/uniprot/P49773	False
PDCD5	0.438575	-1.1891	O14737	PDCD5	GO:2001235,positive regulation of apoptotic signaling pathway|GO:0008104,protein localization|GO:0032388,positive regulation of intracellular transport|GO:0080090,regulation of primary metabolic process|GO:0019222,regulation of metabolic process|GO:2001233,regulation of apoptotic signaling pathway|GO:0051049,regulation of transport|GO:0032386,regulation of intracellular transport|GO:0048584,posit…	GO:0043231,intracellular membrane-bounded organelle|GO:0005737,cytoplasm|GO:0005622,intracellular|GO:0043230,extracellular organelle|GO:0031982,vesicle|GO:0044421,extracellular region part|GO:0043227,membrane-bounded organelle|GO:0005634,nucleus|GO:0044464,cell part|GO:0005623,cell|GO:0031988,membrane-bounded vesicle|GO:0043229,intracellular organelle|GO:0005576,extracellular region|GO:0044424,in…	GO:1901681,sulfur compound binding|GO:0043168,anion binding|GO:0015631,tubulin binding|GO:0005515,protein binding|GO:0048487,beta-tubulin binding|GO:0097367,carbohydrate derivative binding|GO:0097159,organic cyclic compound binding|GO:0030234,enzyme regulator activity|GO:0008092,cytoskeletal protein binding|GO:0008201,heparin binding|GO:0005539,glycosaminoglycan binding|GO:0043167,ion binding|GO:…				http://www.uniprot.org/uniprot/O14737	False
CTPS1	0.432169	-1.21033	P17812	CTPS1	GO:0009218,pyrimidine ribonucleotide metabolic process|GO:0009165,nucleotide biosynthetic process|GO:0009163,nucleoside biosynthetic process|GO:0046134,pyrimidine nucleoside biosynthetic process|GO:1901362,organic cyclic compound biosynthetic process|GO:0046131,pyrimidine ribonucleoside metabolic process|GO:0046132,pyrimidine ribonucleoside biosynthetic process|GO:0044710,single-organism metaboli…	GO:0005737,cytoplasm|GO:0005829,cytosol|GO:0016020,membrane|GO:0044464,cell part|GO:0005623,cell|GO:0005622,intracellular|GO:0044444,cytoplasmic part|GO:0044424,intracellular part|GO:0097268,cytoophidium	GO:0035639,purine ribonucleoside triphosphate binding|GO:0005488,binding|GO:0043167,ion binding|GO:1901363,heterocyclic compound binding|GO:1901265,nucleoside phosphate binding|GO:0001882,nucleoside binding|GO:0043168,anion binding|GO:0000166,nucleotide binding|GO:0016879,ligase activity, forming carbon-nitrogen bonds|GO:0003883,CTP synthase activity|GO:0001883,purine nucleoside binding|GO:003254…	hsa01100,Metabolic pathways|hsa00240,Pyrimidine metabolism			http://www.uniprot.org/uniprot/P17812	False
UBE2M	0.407859	-1.29386	P61081	UBE2M	GO:0048584,positive regulation of response to stimulus|GO:0048583,regulation of response to stimulus|GO:0031349,positive regulation of defense response|GO:0043523,regulation of neuron apoptotic process|GO:0007165,signal transduction|GO:0007166,cell surface receptor signaling pathway|GO:0007167,enzyme linked receptor protein signaling pathway|GO:0031347,regulation of defense response|GO:0051716,ce…	GO:0005737,cytoplasm|GO:0005622,intracellular|GO:0043230,extracellular organelle|GO:0031982,vesicle|GO:0044421,extracellular region part|GO:0043227,membrane-bounded organelle|GO:0005829,cytosol|GO:0044464,cell part|GO:0005623,cell|GO:0031988,membrane-bounded vesicle|GO:0044444,cytoplasmic part|GO:0005576,extracellular region|GO:0044424,intracellular part|GO:1903561,extracellular vesicle|GO:006501…	GO:0044389,ubiquitin-like protein ligase binding|GO:0018169,ribosomal S6-glutamic acid ligase activity|GO:0035639,purine ribonucleoside triphosphate binding|GO:0019899,enzyme binding|GO:0016881,acid-amino acid ligase activity|GO:0005488,binding|GO:0000166,nucleotide binding|GO:1901363,heterocyclic compound binding|GO:0001883,purine nucleoside binding|GO:0001882,nucleoside binding|GO:0019787,ubiqu…	hsa04120,Ubiquitin mediated proteolysis			http://www.uniprot.org/uniprot/P61081	False
AKR1E2	0.400328	-1.32074	Q96JD6	AKR1E2	GO:0009896,positive regulation of catabolic process|GO:0032106,positive regulation of response to extracellular stimulus|GO:0009894,regulation of catabolic process|GO:0016239,positive regulation of macroautophagy|GO:0009893,positive regulation of metabolic process|GO:0031329,regulation of cellular catabolic process|GO:0032101,regulation of response to external stimulus|GO:0031325,positive regulat…	GO:0005737,cytoplasm|GO:0005622,intracellular|GO:0043230,extracellular organelle|GO:0031982,vesicle|GO:0044421,extracellular region part|GO:0043227,membrane-bounded organelle|GO:0044464,cell part|GO:0005623,cell|GO:0031988,membrane-bounded vesicle|GO:0005576,extracellular region|GO:0044424,intracellular part|GO:1903561,extracellular vesicle|GO:0065010,extracellular membrane-bounded organelle|GO:0…	GO:0016614,oxidoreductase activity, acting on CH-OH group of donors|GO:0016616,oxidoreductase activity, acting on the CH-OH group of donors, NAD or NADP as acceptor|GO:0003824,catalytic activity|GO:0050571,1,5-anhydro-D-fructose reductase activity|GO:0016491,oxidoreductase activity|GO:0004033,aldo-keto reductase (NADP) activity|GO:0004032,alditol:NADP+ 1-oxidoreductase activity|GO:0008106,alcohol…				http://www.uniprot.org/uniprot/Q96JD6	False
NPEPPS	0.397576	-1.3307	H0YDG0	NPEPPS	GO:0044238,primary metabolic process|GO:0019538,protein metabolic process|GO:0043170,macromolecule metabolic process|GO:0071704,organic substance metabolic process|GO:0008152,metabolic process|GO:0006508,proteolysis|GO:1901564,organonitrogen compound metabolic process|GO:0006807,nitrogen compound metabolic process						http://www.uniprot.org/uniprot/H0YDG0	False
CLIC2	0.390112	-1.35804	O15247	CLIC2	GO:0051049,regulation of transport|GO:0032386,regulation of intracellular transport|GO:0051282,regulation of sequestering of calcium ion|GO:0051283,negative regulation of sequestering of calcium ion|GO:0032845,negative regulation of homeostatic process|GO:0032844,regulation of homeostatic process|GO:0006820,anion transport|GO:0006821,chloride transport|GO:0007165,signal transduction|GO:0098771,in…	GO:0034707,chloride channel complex|GO:0043229,intracellular organelle|GO:0034702,ion channel complex|GO:0043227,membrane-bounded organelle|GO:0043226,organelle|GO:0031224,intrinsic component of membrane|GO:0005737,cytoplasm|GO:0016021,integral component of membrane|GO:0016020,membrane|GO:1902495,transmembrane transporter complex|GO:1990351,transporter complex|GO:0043234,protein complex|GO:003299…	GO:0005488,binding|GO:0016491,oxidoreductase activity|GO:0004364,glutathione transferase activity|GO:0008509,anion transmembrane transporter activity|GO:0016765,transferase activity, transferring alkyl or aryl (other than methyl) groups|GO:0016740,transferase activity|GO:0015103,inorganic anion transmembrane transporter activity|GO:0022803,passive transmembrane transporter activity|GO:0016684,oxi…				http://www.uniprot.org/uniprot/O15247	False
VPS4A	0.375461	-1.41327	Q9UN37	VPS4A	GO:0044238,primary metabolic process|GO:0051046,regulation of secretion|GO:0051047,positive regulation of secretion|GO:0051049,regulation of transport|GO:1903774,positive regulation of viral budding via host ESCRT complex|GO:1903772,regulation of viral budding via host ESCRT complex|GO:0061025,membrane fusion|GO:0061024,membrane organization|GO:0007009,plasma membrane organization|GO:0008104,prot…	GO:0016020,membrane|GO:0000323,lytic vacuole|GO:0044421,extracellular region part|GO:0044464,cell part|GO:0043229,intracellular organelle|GO:0043228,non-membrane-bounded organelle|GO:0032991,macromolecular complex|GO:0005774,vacuolar membrane|GO:0043227,membrane-bounded organelle|GO:0043226,organelle|GO:0010008,endosome membrane|GO:0005856,cytoskeleton|GO:0005764,lysosome|GO:0005819,spindle|GO:00…	GO:0008022,protein C-terminus binding|GO:0035639,purine ribonucleoside triphosphate binding|GO:0005488,binding|GO:0016887,ATPase activity|GO:0043167,ion binding|GO:1901363,heterocyclic compound binding|GO:1901265,nucleoside phosphate binding|GO:0001882,nucleoside binding|GO:0043168,anion binding|GO:0042623,ATPase activity, coupled|GO:0008568,microtubule-severing ATPase activity|GO:0000166,nucleot…	hsa04144,Endocytosis|hsa04217,Necroptosis			http://www.uniprot.org/uniprot/Q9UN37	False
GAPVD1	0.327577	-1.61009	F8W9S7	GAPVD1	GO:0051336,regulation of hydrolase activity|GO:0044700,single organism signaling|GO:0051716,cellular response to stimulus|GO:0009987,cellular process|GO:0019222,regulation of metabolic process|GO:0050896,response to stimulus|GO:0050790,regulation of catalytic activity|GO:0044763,single-organism cellular process|GO:0050794,regulation of cellular process|GO:0065007,biological regulation|GO:0023052,…	GO:0005737,cytoplasm|GO:0005829,cytosol|GO:0044464,cell part|GO:0005623,cell|GO:0005622,intracellular|GO:0044444,cytoplasmic part|GO:0044424,intracellular part|GO:0016020,membrane|GO:0071944,cell periphery|GO:0005886,plasma membrane					http://www.uniprot.org/uniprot/F8W9S7	False
GSTT1	0.317214	-1.65647	P30711	GSTT1	GO:0006805,xenobiotic metabolic process|GO:0034641,cellular nitrogen compound metabolic process|GO:0006807,nitrogen compound metabolic process|GO:0044281,small molecule metabolic process|GO:0070887,cellular response to chemical stimulus|GO:1901566,organonitrogen compound biosynthetic process|GO:0044699,single-organism process|GO:1901576,organic substance biosynthetic process|GO:0044710,single-org…	GO:0005737,cytoplasm|GO:0005622,intracellular|GO:0043230,extracellular organelle|GO:0031982,vesicle|GO:0044421,extracellular region part|GO:0043227,membrane-bounded organelle|GO:0005829,cytosol|GO:0044464,cell part|GO:0005623,cell|GO:0031988,membrane-bounded vesicle|GO:0044444,cytoplasmic part|GO:0005576,extracellular region|GO:0044424,intracellular part|GO:1903561,extracellular vesicle|GO:006501…	GO:0004364,glutathione transferase activity|GO:0003824,catalytic activity|GO:0016209,antioxidant activity|GO:0016765,transferase activity, transferring alkyl or aryl (other than methyl) groups|GO:0016740,transferase activity|GO:0016684,oxidoreductase activity, acting on peroxide as acceptor|GO:0004601,peroxidase activity|GO:0004602,glutathione peroxidase activity|GO:0016491,oxidoreductase activit…	hsa00980,Metabolism of xenobiotics by cytochrome P450|hsa00983,Drug metabolism - other enzymes|hsa00982,Drug metabolism - cytochrome P450|hsa05204,Chemical carcinogenesis|hsa01100,Metabolic pathways|hsa01524,Platinum drug resistance|hsa05200,Pathways in cancer|hsa05418,Fluid shear stress and atherosclerosis|hsa05225,Hepatocellular carcinoma|hsa00480,Glutathione metabolism			http://www.uniprot.org/uniprot/P30711	False
NUTF2	0.281131	-1.83068	P61970	NUTF2	GO:0034504,protein localization to nucleus|GO:0033157,regulation of intracellular protein transport|GO:0051169,nuclear transport|GO:0051168,nuclear export|GO:0032388,positive regulation of intracellular transport|GO:0060341,regulation of cellular localization|GO:0006611,protein export from nucleus|GO:1903651,positive regulation of cytoplasmic transport|GO:0032386,regulation of intracellular trans…	GO:0016020,membrane|GO:0044421,extracellular region part|GO:0031975,envelope|GO:0042175,nuclear outer membrane-endoplasmic reticulum membrane network|GO:0043229,intracellular organelle|GO:0043227,membrane-bounded organelle|GO:0043226,organelle|GO:0031224,intrinsic component of membrane|GO:0005737,cytoplasm|GO:0046930,pore complex|GO:0031982,vesicle|GO:0005634,nucleus|GO:0005635,nuclear envelope|G…	GO:0005215,transporter activity|GO:0008536,Ran GTPase binding|GO:0019899,enzyme binding|GO:0017016,Ras GTPase binding|GO:0031267,small GTPase binding|GO:0051020,GTPase binding|GO:0005488,binding|GO:0005515,protein binding|GO:0005487,nucleocytoplasmic transporter activity|GO:0008565,protein transporter activity|GO:0022892,substrate-specific transporter activity|GO:0005198,structural molecule activ…				http://www.uniprot.org/uniprot/P61970	False
HBB	0.280017	-1.83641	P68871	HBB	GO:0007599,hemostasis|GO:0019222,regulation of metabolic process|GO:0007596,blood coagulation|GO:0006820,anion transport|GO:0003013,circulatory system process|GO:0003014,renal system process|GO:0044281,small molecule metabolic process|GO:0003018,vascular process in circulatory system|GO:0071840,cellular component organization or biogenesis|GO:0044712,single-organism catabolic process|GO:0044710,s…	GO:0031974,membrane-enclosed lumen|GO:0030139,endocytic vesicle|GO:0043229,intracellular organelle|GO:0060205,cytoplasmic membrane-bounded vesicle lumen|GO:0031988,membrane-bounded vesicle|GO:0043227,membrane-bounded organelle|GO:0043226,organelle|GO:0005737,cytoplasm|GO:0031983,vesicle lumen|GO:0070062,extracellular exosome|GO:0071682,endocytic vesicle lumen|GO:0016023,cytoplasmic, membrane-boun…	GO:0005344,oxygen transporter activity|GO:0005488,binding|GO:1901363,heterocyclic compound binding|GO:0016491,oxidoreductase activity|GO:0043169,cation binding|GO:0016684,oxidoreductase activity, acting on peroxide as acceptor|GO:0046914,transition metal ion binding|GO:0043167,ion binding|GO:0005506,iron ion binding|GO:0046872,metal ion binding|GO:0020037,heme binding|GO:0005215,transporter activ…	hsa05143,African trypanosomiasis|hsa05144,Malaria	H00020,Colorectal cancer|H00022,Bladder cancer		http://www.uniprot.org/uniprot/P68871	False
RAB35	0.268183	-1.89871	Q15286	RAB35	GO:0042221,response to chemical|GO:0032502,developmental process|GO:1990090,cellular response to nerve growth factor stimulus|GO:0008104,protein localization|GO:0030030,cell projection organization|GO:0044699,single-organism process|GO:0030154,cell differentiation|GO:0048468,cell development|GO:0048227,plasma membrane to endosome transport|GO:0023052,signaling|GO:0007165,signal transduction|GO:00…	GO:0098590,plasma membrane region|GO:0005783,endoplasmic reticulum|GO:0048770,pigment granule|GO:0005789,endoplasmic reticulum membrane|GO:0030139,endocytic vesicle|GO:0042175,nuclear outer membrane-endoplasmic reticulum membrane network|GO:0043229,intracellular organelle|GO:0071944,cell periphery|GO:0005905,clathrin-coated pit|GO:0005622,intracellular|GO:0030135,coated vesicle|GO:0043226,organel…	GO:0035639,purine ribonucleoside triphosphate binding|GO:0005488,binding|GO:0043167,ion binding|GO:1901363,heterocyclic compound binding|GO:1901265,nucleoside phosphate binding|GO:0001882,nucleoside binding|GO:0043168,anion binding|GO:0016462,pyrophosphatase activity|GO:0097367,carbohydrate derivative binding|GO:0005543,phospholipid binding|GO:0005546,phosphatidylinositol-4,5-bisphosphate binding…	hsa04144,Endocytosis			http://www.uniprot.org/uniprot/Q15286	False
XK	0.249409	-2.00342	P51811	XK	GO:0030003,cellular cation homeostasis|GO:0048468,cell development|GO:0006820,anion transport|GO:0055074,calcium ion homeostasis|GO:0098771,inorganic ion homeostasis|GO:0090066,regulation of anatomical structure size|GO:0010960,magnesium ion homeostasis|GO:0031344,regulation of cell projection organization|GO:0071840,cellular component organization or biogenesis|GO:0007517,muscle organ developmen…	GO:0016021,integral component of membrane|GO:0016020,membrane|GO:0005623,cell|GO:0044425,membrane part|GO:0031224,intrinsic component of membrane|GO:0044464,cell part|GO:0071944,cell periphery|GO:0005886,plasma membrane	GO:0005215,transporter activity|GO:0005488,binding|GO:0005515,protein binding				http://www.uniprot.org/uniprot/P51811	False
PRDX2	0.247625	-2.01377	A6NIW5	PRDX2	GO:0008152,metabolic process|GO:0044710,single-organism metabolic process|GO:0044699,single-organism process|GO:0055114,oxidation-reduction process|GO:0000305,response to oxygen radical|GO:0000303,response to superoxide|GO:0000302,response to reactive oxygen species|GO:0042592,homeostatic process|GO:0006801,superoxide metabolic process|GO:0070887,cellular response to chemical stimulus|GO:0098754,…	GO:0005623,cell	GO:0003824,catalytic activity|GO:0016209,antioxidant activity|GO:0016491,oxidoreductase activity|GO:0051920,peroxiredoxin activity|GO:0008379,thioredoxin peroxidase activity|GO:0016684,oxidoreductase activity, acting on peroxide as acceptor|GO:0004601,peroxidase activity				http://www.uniprot.org/uniprot/A6NIW5	False
CRLF3	0.231592	-2.11034	Q8IUI8	CRLF3	GO:0080090,regulation of primary metabolic process|GO:0019222,regulation of metabolic process|GO:0048584,positive regulation of response to stimulus|GO:0048583,regulation of response to stimulus|GO:0007165,signal transduction|GO:1901576,organic substance biosynthetic process|GO:1901362,organic cyclic compound biosynthetic process|GO:0071840,cellular component organization or biogenesis|GO:0051716…	GO:0005737,cytoplasm|GO:0016020,membrane|GO:0044464,cell part|GO:0005623,cell|GO:0005622,intracellular|GO:0071944,cell periphery|GO:0005886,plasma membrane|GO:0044424,intracellular part|GO:0005829,cytosol|GO:0044444,cytoplasmic part|GO:0043231,intracellular membrane-bounded organelle|GO:0005634,nucleus|GO:0043229,intracellular organelle|GO:0043226,organelle|GO:0043227,membrane-bounded organelle	GO:0005488,binding|GO:0005515,protein binding|GO:0042802,identical protein binding|GO:0003676,nucleic acid binding|GO:0097159,organic cyclic compound binding|GO:0003677,DNA binding|GO:1901363,heterocyclic compound binding				http://www.uniprot.org/uniprot/Q8IUI8	False
CA1	0.212628	-2.2336	P00915	CA1	GO:0044710,single-organism metabolic process|GO:0006810,transport|GO:0044699,single-organism process|GO:0006730,one-carbon metabolic process|GO:0009987,cellular process|GO:0015701,bicarbonate transport|GO:0044237,cellular metabolic process|GO:0015711,organic anion transport|GO:0044765,single-organism transport|GO:0006820,anion transport|GO:0044763,single-organism cellular process|GO:0044281,small…	GO:0005737,cytoplasm|GO:0005622,intracellular|GO:0043230,extracellular organelle|GO:0031982,vesicle|GO:0044421,extracellular region part|GO:0043227,membrane-bounded organelle|GO:0005829,cytosol|GO:0044464,cell part|GO:0005623,cell|GO:0031988,membrane-bounded vesicle|GO:0044444,cytoplasmic part|GO:0005576,extracellular region|GO:0044424,intracellular part|GO:1903561,extracellular vesicle|GO:006501…	GO:0005488,binding|GO:0016787,hydrolase activity|GO:0046872,metal ion binding|GO:0046914,transition metal ion binding|GO:0043169,cation binding|GO:0016835,carbon-oxygen lyase activity|GO:0016836,hydro-lyase activity|GO:0052689,carboxylic ester hydrolase activity|GO:0043167,ion binding|GO:0003824,catalytic activity|GO:0016788,hydrolase activity, acting on ester bonds|GO:0005515,protein binding|GO:…	hsa01100,Metabolic pathways|hsa00910,Nitrogen metabolism		D00218,Acetazolamide (JP16/USP/INN); Diamox (TN)|D00518,Diclofenamide (JP16/INN); Dichlorphenamide (USP); Daranide (TN)|D00652,Brinzolamide (JAN/USP/INN); Azopt (TN)|D00653,Dorzolamide hydrochloride (JP16/USP); Trusopt (TN)|D00655,Methazolamide (JAN/USP/INN); Neptazane (TN)|D01196,Acetazolamide sodium (JAN); Diamox (TN)|D01822,Clofenamide (JAN/INN)|D02441,Ethoxzolamide; Cardrase (TN)|D03845,Sezol…	http://www.uniprot.org/uniprot/P00915	False
PCBD2	0.165565	-2.59453	Q9H0N5	PCBD2	GO:0080090,regulation of primary metabolic process|GO:0019222,regulation of metabolic process|GO:0051289,protein homotetramerization|GO:2000112,regulation of cellular macromolecule biosynthetic process|GO:0042558,pteridine-containing compound metabolic process|GO:1901362,organic cyclic compound biosynthetic process|GO:1901360,organic cyclic compound metabolic process|GO:0044710,single-organism me…	GO:0005737,cytoplasm|GO:0043231,intracellular membrane-bounded organelle|GO:0005634,nucleus|GO:0044464,cell part|GO:0044444,cytoplasmic part|GO:0005739,mitochondrion|GO:0005622,intracellular|GO:0043229,intracellular organelle|GO:0005623,cell|GO:0044424,intracellular part|GO:0043227,membrane-bounded organelle|GO:0043226,organelle	GO:0004505,phenylalanine 4-monooxygenase activity|GO:0008124,4-alpha-hydroxytetrahydrobiopterin dehydratase activity|GO:0016836,hydro-lyase activity|GO:0016705,oxidoreductase activity, acting on paired donors, with incorporation or reduction of molecular oxygen|GO:0004497,monooxygenase activity|GO:0003824,catalytic activity|GO:0005488,binding|GO:0005515,protein binding|GO:0016714,oxidoreductase a…	hsa01100,Metabolic pathways|hsa00790,Folate biosynthesis			http://www.uniprot.org/uniprot/Q9H0N5	False
AP2M1	0.139237	-2.84438	Q96CW1	AP2M1	GO:0002495,antigen processing and presentation of peptide antigen via MHC class II|GO:0008104,protein localization|GO:0050688,regulation of defense response to virus|GO:0048585,negative regulation of response to stimulus|GO:0048583,regulation of response to stimulus|GO:0061024,membrane organization|GO:0007009,plasma membrane organization|GO:0007165,signal transduction|GO:0007166,cell surface rece…	GO:0098796,membrane protein complex|GO:0000323,lytic vacuole|GO:0044464,cell part|GO:0030139,endocytic vesicle|GO:0043229,intracellular organelle|GO:0071944,cell periphery|GO:0030117,membrane coat|GO:0005905,clathrin-coated pit|GO:0005773,vacuole|GO:0030131,clathrin adaptor complex|GO:0030119,AP-type membrane coat adaptor complex|GO:0005774,vacuolar membrane|GO:0030135,coated vesicle|GO:0043226,o…	GO:0030674,protein binding, bridging|GO:0042277,peptide binding|GO:0005048,signal sequence binding|GO:0005215,transporter activity|GO:0008289,lipid binding|GO:0070325,lipoprotein particle receptor binding|GO:0098748,endocytic adaptor activity|GO:0005488,binding|GO:0005515,protein binding|GO:0033218,amide binding|GO:0030276,clathrin binding|GO:0005102,receptor binding|GO:0050750,low-density lipopr…	hsa04721,Synaptic vesicle cycle|hsa05016,Huntington's disease|hsa04961,Endocrine and other factor-regulated calcium reabsorption|hsa04144,Endocytosis			http://www.uniprot.org/uniprot/Q96CW1	False
HBG1	0.100059	-3.32107	P69891	HBG1	GO:0051234,establishment of localization|GO:0044699,single-organism process|GO:0032501,multicellular organismal process|GO:0007599,hemostasis|GO:0044707,single-multicellular organism process|GO:0050878,regulation of body fluid levels|GO:0006950,response to stress|GO:0050896,response to stimulus|GO:0007596,blood coagulation|GO:0009611,response to wounding|GO:0042060,wound healing|GO:0015669,gas tr…	GO:0043234,protein complex|GO:0005737,cytoplasm|GO:0032991,macromolecular complex|GO:0005829,cytosol|GO:0044464,cell part|GO:0005623,cell|GO:0005833,hemoglobin complex|GO:0044444,cytoplasmic part|GO:0044445,cytosolic part|GO:0044424,intracellular part|GO:0005622,intracellular|GO:0031838,haptoglobin-hemoglobin complex	GO:0043169,cation binding|GO:0005344,oxygen transporter activity|GO:0022892,substrate-specific transporter activity|GO:0046914,transition metal ion binding|GO:0020037,heme binding|GO:0046906,tetrapyrrole binding|GO:0005215,transporter activity|GO:0043167,ion binding|GO:0019825,oxygen binding|GO:0005488,binding|GO:0097159,organic cyclic compound binding|GO:0005506,iron ion binding|GO:0046872,metal…				http://www.uniprot.org/uniprot/P69891	False
EHBP1L1	0.0927104	-3.43112	Q8N3D4	EHBP1L1	GO:0006996,organelle organization|GO:0007010,cytoskeleton organization|GO:0030029,actin filament-based process|GO:0009987,cellular process|GO:0016043,cellular component organization|GO:0030036,actin cytoskeleton organization|GO:0071840,cellular component organization or biogenesis	GO:0016020,membrane|GO:0005768,endosome|GO:0005737,cytoplasm|GO:0031982,vesicle|GO:0031410,cytoplasmic vesicle|GO:0044464,cell part|GO:0005623,cell|GO:0005622,intracellular|GO:0044444,cytoplasmic part|GO:0097708,intracellular vesicle|GO:0044424,intracellular part|GO:0043227,membrane-bounded organelle|GO:0043226,organelle|GO:0012505,endomembrane system|GO:0043229,intracellular organelle|GO:0099512…					http://www.uniprot.org/uniprot/Q8N3D4	False
GYPA	0.0781724	-3.6772	P02724	GYPA	GO:0046718,viral entry into host cell|GO:0040011,locomotion|GO:0009987,cellular process|GO:0052192,movement in environment of other organism involved in symbiotic interaction|GO:0044764,multi-organism cellular process|GO:0044419,interspecies interaction between organisms|GO:0030260,entry into host cell|GO:0051828,entry into other organism involved in symbiotic interaction|GO:0019058,viral life cy…	GO:0043230,extracellular organelle|GO:0031982,vesicle|GO:0044421,extracellular region part|GO:0043227,membrane-bounded organelle|GO:0016021,integral component of membrane|GO:0016020,membrane|GO:0044464,cell part|GO:0005623,cell|GO:0031988,membrane-bounded vesicle|GO:0071944,cell periphery|GO:0005576,extracellular region|GO:0005886,plasma membrane|GO:0044425,membrane part|GO:1903561,extracellular …	GO:0001618,virus receptor activity|GO:0060089,molecular transducer activity|GO:0005488,binding|GO:0005515,protein binding|GO:0042802,identical protein binding|GO:0004872,receptor activity|GO:0140272,exogenous protein binding|GO:0104005,hijacked molecular function	hsa05144,Malaria|hsa04640,Hematopoietic cell lineage			http://www.uniprot.org/uniprot/P02724	False
VAPA	0.0483829	-4.36936	Q9P0L0	VAPA	GO:0008104,protein localization|GO:0048584,positive regulation of response to stimulus|GO:0048583,regulation of response to stimulus|GO:0006900,membrane budding|GO:0061025,membrane fusion|GO:0061024,membrane organization|GO:0007165,signal transduction|GO:1901576,organic substance biosynthetic process|GO:0071840,cellular component organization or biogenesis|GO:0044710,single-organism metabolic pro…	GO:0005783,endoplasmic reticulum|GO:0005789,endoplasmic reticulum membrane|GO:0042175,nuclear outer membrane-endoplasmic reticulum membrane network|GO:0043229,intracellular organelle|GO:0043228,non-membrane-bounded organelle|GO:0005622,intracellular|GO:0043227,membrane-bounded organelle|GO:0005923,bicellular tight junction|GO:0030054,cell junction|GO:0070971,endoplasmic reticulum exit site|GO:003…	GO:0015631,tubulin binding|GO:0005515,protein binding|GO:0008092,cytoskeletal protein binding|GO:0008017,microtubule binding|GO:0033149,FFAT motif binding|GO:0060089,molecular transducer activity|GO:0044877,macromolecular complex binding|GO:0019904,protein domain specific binding|GO:0004871,signal transducer activity|GO:0032403,protein complex binding|GO:0046983,protein dimerization activity|GO:0…	hsa04979,Cholesterol metabolism			http://www.uniprot.org/uniprot/Q9P0L0	False
CSNK2A1	0.0207222	-5.59268	P68400	CSNK2A1	GO:0080090,regulation of primary metabolic process|GO:0032434,regulation of proteasomal ubiquitin-dependent protein catabolic process|GO:0032435,negative regulation of proteasomal ubiquitin-dependent protein catabolic process|GO:0048584,positive regulation of response to stimulus|GO:0048583,regulation of response to stimulus|GO:0044257,cellular protein catabolic process|GO:0030111,regulation of W…	GO:0031974,membrane-enclosed lumen|GO:0043229,intracellular organelle|GO:0043228,non-membrane-bounded organelle|GO:0000785,chromatin|GO:0000228,nuclear chromosome|GO:0043227,membrane-bounded organelle|GO:0043226,organelle|GO:0005737,cytoplasm|GO:0070822,Sin3-type complex|GO:0070603,SWI/SNF superfamily-type complex|GO:0031519,PcG protein complex|GO:0031981,nuclear lumen|GO:0005634,nucleus|GO:00160…	GO:0035639,purine ribonucleoside triphosphate binding|GO:0031072,heat shock protein binding|GO:0004672,protein kinase activity|GO:0043167,ion binding|GO:1901363,heterocyclic compound binding|GO:0001883,purine nucleoside binding|GO:0001882,nucleoside binding|GO:0043168,anion binding|GO:0000166,nucleotide binding|GO:0004674,protein serine/threonine kinase activity|GO:0016740,transferase activity|GO…	hsa03008,Ribosome biogenesis in eukaryotes|hsa05235,unkown|hsa04137,unkown|hsa04520,Adherens junction|hsa04064,NF-kappa B signaling pathway|hsa04310,Wnt signaling pathway|hsa05162,Measles			http://www.uniprot.org/uniprot/P68400	False
MAPK1IP1L	0.0114888	-6.44363	Q8NDC0	MAPK1IP1L			GO:0005488,binding|GO:0005515,protein binding				http://www.uniprot.org/uniprot/Q8NDC0	False
